1 The causal connections between gut microbiota and chronic pain and pain  
2 phenotypes through the gut-brain axis: A Mendelian randomization study  
3 and mediation analysis

4

5 Jia Chen<sup>#ab</sup>, MD, Xuemei Luo<sup>#ab</sup>, BD, Luyao Wang<sup>ab</sup>, MD, Yiping Luo<sup>ab</sup>,  
6 MD, Xia Deng<sup>ab</sup>, MD, Yuan Tian<sup>ab</sup>, MD, Qiao Lu<sup>ab</sup>, BD, Genwen Sun<sup>ab</sup>,  
7 MD, Michael Maes<sup>\*ab</sup>, MD, PhD, Xu Zhang<sup>\*ab</sup>, PhD

8

9 a:Sichuan Provincial Center for Mental Health, Sichuan Provincial  
10 People's Hospital, School of Medicine, University of Electronic Science  
11 and Technology of China, Chengdu 610072, China.

12 b:Key Laboratory of Psychosomatic Medicine, Chinese Academy of  
13 Medical Sciences, Chengdu, 610072, China.

14 #:Co-first author

15 \*:First Corresponding author (Xu Zhang)

16 Email:26867455@qq.com

17 \* : Co-Corresponding author (Michael Maes)

18 Email:dr.michaelmaes@hotmail.com

19

20 Author contributions

21 Xu Zhang, Michael Maes, Xuemei Luo, and Jia Chen contributed to study  
22 design, data acquisition and analysis, manuscript drafting and revision,

23 and the supervision of the research. Luyao Wang, Yiping Luo, Yuan Tian  
24 and Xia Deng contributed to the data analysis and manuscript revision,  
25 Qiao Lu and Genwen Sun contributed to the manuscript revision. All  
26 authors reviewed and approved the paper for publication.

27

## 28 Acknowledgements

29 We wish to acknowledge the participants and investigators of the UK  
30 Biobank, FINRISK 2002 study, Enhancing NeuroImaging Genetics  
31 through Meta-Analysis Consortium, the Integrative Epidemiology Unit  
32 (IEU, <https://gwas.mrcieu.ac.uk/>), the GWAS Catalog  
33 (<https://www.ebi.ac.uk/gwas/>).

34

## 35 Funding

36 No funding was received for this research.

37

## 38 Declaration of competing interest

39 None declared.

40

## 41 Competing interests

42 The authors declare that the research was conducted in the absence of any  
43 commercial or financial relationships that could be construed as a  
44 potential conflict of interest.

45

46 Data availability

47 All relevant data are within the manuscript and its Supplementary

48 Material.

49

50

51 Abstract

52 Recent studies have increasingly highlighted a potential link between gut  
53 microbiota (GM) and chronic pain. However, existing research has  
54 yielded mixed results, leaving many questions unanswered. We employed  
55 a two-sample Mendelian randomization design to investigate whether  
56 GM directly influences multisite chronic pain (MCP) and eight  
57 phenotypes. We then used a combination of meta-analysis, genetic  
58 colocalization analysis, and Bayesian weighted mendelian randomization  
59 to further strengthen the evidence for causal relationship. Additionally,  
60 we examined how GM might be associated with human brain structures.  
61 Finally, we used mediation analysis to explore whether the structure and  
62 function of specific brain regions play a role in the relationship between  
63 GM and MCP and the pain phenotypes.

64 We observed a significant causal association between 13 GM and chronic  
65 pain. Eight GM protected against pain phenotypes, whereas seven  
66 increased risk. The results indicate that GM could potentially affect the  
67 area, thickness, and volume of brain region cortices involved in sensory,  
68 emotional, and cognitive aspects of pain. Importantly, our findings  
69 indicated that the causal effect between the Genus *Odoribacter* and  
70 neck/shoulder pain could be mediated by the mean optical density in the  
71 left Fornix cres+Stria terminalis. In conclusion, different pain phenotypes  
72 were causally associated with different GM among European ancestry.

73 Core GM may influence chronic pain by affecting complex brain  
74 networks. Notably, we constructed a basic gut-brain axis model for  
75 neck/shoulder pain, involving the Genus *Odoribacter*, left Fornix  
76 cres+Stria terminalis, and neck/shoulder pain.

77

78 Key words: chronic pain, pain phenotype, Gut microbiota, Gut-brain axis,  
79 Brain imaging, metagenomics

80

81

## 82 Introduction

83 Chronic pain (CP) is a major public health issue with significant global  
84 attention. About 30% global population experiences CP [34]. While  
85 various causes exist, CP can be idiopathic (with unknown origin) or  
86 difficult to categorize pathophysiologically [82]. Notably, CP shows a  
87 genetic link, with pain phenotypes exhibiting heritability [49].

88 The gut microbiota (GM) is the human body's most complex and densely  
89 populated microbial ecosystem [33,76]. Recent research highlights its  
90 emerging role in the pathophysiology and regulation of pain [62-63]. The  
91 gut-brain axis (GBA) is a complex network of communication channels  
92 between the gut and brain [66], disruptions in which might be linked to  
93 neurological diseases including pain [27, 66].

94 Preclinical studies have demonstrated a link between GM and visceral  
95 pain [25,53]. Probiotics can lessen visceral pain [80] and might even  
96 affect the development of brain regions involved in pain processing [45].  
97 Animal studies further suggest that GM influences various chronic pain  
98 conditions, including pain caused by inflammation and nerve damage [40,  
99 62]. Other findings hint at a possible connection to nociceptive pain,  
100 complex regional pain syndrome, and headaches [50]. This suggests that  
101 GM might directly or indirectly regulate neuronal excitability in the  
102 peripheral nervous system [61-62, 74].

103 Despite these findings, the causal effect of GM on pain remains unclear

104 due to potential biases. Mendelian randomization (MR) has been  
105 employed to investigate the relationship between GM and specific pain  
106 conditions, including colorectal cancer [39], irritable bowel syndrome  
107 [42], intervertebral disc degeneration [22], osteoarthritis [38,94],  
108 ankylosing spondylitis [90], and back pain [29,78]. Not only are the  
109 conclusions of the above-mentioned studies inconsistent, but also pain  
110 with unclear pathophysiology is more common in clinical practice. This  
111 underscores the need to examine pain phenotypes.

112 While the microbiota's role in pain is gaining traction, many questions  
113 remain unanswered. In chronic pain, key questions include whether the  
114 GM plays a role in chronic pain and different pain phenotypes? How can  
115 GBA models be constructed for chronic pain and different pain  
116 phenotypes? MR can analyze the potential causal relationship between  
117 GM and pain by using genetic variations as instrumental variables (IVs)  
118 [37]. Furthermore, mediation analysis [67] can help decompose the  
119 impact of GM on pain.

120 In this study, we aimed to (1) identify potential positive GM affecting  
121 multisite chronic pain (MCP) and eight pain phenotypes, (2) analyze the  
122 effect of potential positive GM on brain structure, and (3) develop a basic  
123 GBA model for MCP and pain phenotypes to provide practical  
124 suggestions for clinical practice.

125

## 126 Materials and methods

### 127 1.1 Study design

128 This study investigated the potential cause-and-effect link between GM  
129 and chronic pain using a two-sample MR approach. We utilized data on  
130 four relevant GM features and assessed their association with both MCP  
131 and eight specific pain phenotypes. We further evaluated the relationship  
132 between positive exposure and outcomes using meta-analysis and genetic  
133 colocalization analysis. Subsequently, we examined the relationship  
134 between potential positive GM and brain imaging-derived phenotypes,  
135 and brain structure. Finally, we explored whether the structure and  
136 function of specific brain regions impacted the relationship between  
137 positive GM and MCP, as well as the eight pain phenotypes, through  
138 mediation analysis.

139

#### 140 1. Data sources and instruments

141 To minimize bias caused by sample overlap, we obtained exposure (GM)  
142 and outcome (MCP and pain phenotype) data from independent sources.  
143 Table 1 summarizes the data sources and sample sizes. Ethical approval  
144 for the original studies was publicly confirmed, and this analysis did not  
145 require separate ethical approval.

146

#### 147 2.1 MCP



148 We obtained data on MCP from the UK Biobank Consortium, a large  
149 collection of genetic and health information. This database includes  
150 genome-wide association studies (GWAS) for a large population of  
151 European ancestry (387,649 individuals) [31]. MCP referred to chronic  
152 pain lasting 3 months or more in the head, face, neck/shoulder, back,  
153 stomach/abdomen, hip, and knee.

154

## 155 2.2 Eight pain phenotypes

156 Data on eight individual pain conditions were collected from UK Biobank  
157 participants (ranging from 151,922 to 226,683 participants depending on  
158 the specific pain type) [49]. A validated questionnaire was utilized to  
159 assess participants' experiences with pain in the past month that impacted  
160 their daily activities, including pain in the head, face, neck/shoulder pain,  
161 back, stomach/abdomen, hips, knees, and all over the body. We excluded  
162 participants who chose "prefer not to say" and focused on pain in seven  
163 specific locations (head, neck/shoulder, back, abdomen, face, knee, and  
164 hip). Individuals who reported pain in a specific location were classified  
165 as cases, regardless of other pain selections. Participants who reported  
166 "none of the above" were classified as controls. We also included "pain  
167 all over the body" as a potential indicator of chronic widespread pain,  
168 which is a distinct condition from localized chronic pain.

169

170 2.3 GM

171 Data 1: MiBioGen consortium study (14,306 Europeans): This study used  
172 16S rRNA gene sequencing and analyzed 211 microbial taxa (9 phyla, 16  
173 classes, 20 orders, 35 families, 131 genera) from European  
174 participants[36].

175 Data 2: German single-country GWAS study (8,956 Germans): This study  
176 analyzed gut bacteria using 16S rRNA gene sequencing[65]. We  
177 examined 233 different bacterial groups (4 phyla, 8 classes, 6 orders, 10  
178 families, 29 genera; 65, 62, and 49 at 97% OTU, 99% OTU, and ASV  
179 levels) to understand their abundance. Additionally, we analyzed the  
180 presence or absence of 198 bacterial features (2 classes, 1 order, 2  
181 families, 17 genera; 65, 62, and 49 on 97% OTU, 99% OTU, and ASV  
182 levels), based on taxonomic annotation or ASV/OTU clustering.

183 Data 3: Dutch Microbiome Project study (7,738 individuals): This study  
184 used shotgun metagenomic sequencing[44] and analyzed 207 microbial  
185 taxa (5 phyla, 10 classes, 13 orders, 26 families, 48 genera, and 105  
186 species) and 205 functional pathways.

187 Data 4: FINRISK 2002 study (5,959 individuals): This study used  
188 shotgun metagenomic sequencing [60] and analyzed 471 distinct Genome  
189 Taxonomy Database (GTDB) taxa (11 phyla, 19 classes, 24 orders, 62  
190 families, 146 genera, and 209 species).

191

## 192 2.4 Brain

### 193 2.4.1 Brain imaging-derived phenotypes

194 Summary statistics for brain imaging-derived (BID) phenotypes were  
195 obtained from a large GWAS conducted by Smith et al. [70] using data  
196 from the UK Biobank, which included 39,691 European individuals. This  
197 dataset comprises nearly 4,000 BID phenotypes encompassing brain  
198 structure, function, connectivity, and microstructure.

199

### 200 2.4.2 Human brain cortical data

201 We leveraged brain magnetic resonance imaging (MRI) data from a  
202 large-scale analysis (genome-wide association meta-analysis) involving  
203 over 51,000 individuals of European descent across 60 separate studies.  
204 This analysis was conducted by a research group within the Enhancing  
205 NeuroImaging Genetics through Meta-Analysis (ENIGMA) Consortium.  
206 The study focused on two key aspects of the brain's outer layer (cortex):  
207 the total surface area (SA) and average thickness (TH). Additionally, they  
208 examined 34 specific regions within the cortex known to have distinct  
209 functions, as defined by the Desikan-Killiany atlas [24]. For further  
210 details, please refer to the original ENIGMA study. In our analysis, we  
211 specifically used data on the SA and TH of these brain regions,  
212 accounting for overall brain size and genetic background.

213

#### 214 2.4.3 Brain-wide volumes

215 Researchers developed a technique called genomic principal component  
216 analysis (PCA), which allowed them to analyze brain scans and identify  
217 general underlying patterns in brain structures (morphometry) across the  
218 entire brain; the analysis takes into account the potential underlying  
219 genetic influences [21]. This technique was applied to genetic data  
220 associated with 83 distinct brain volume measurements in over 36,000  
221 UK Biobank participants. Unlike traditional methods that focus on  
222 genetic similarity between individuals, Genomic PCA identifies key  
223 genetic components that capture the overall variation in brain volume  
224 across different brain regions.

225

#### 226 3. Genetic variants selection criteria

227 We identified genetic variations (single nucleotide polymorphisms, SNPs)  
228 that strongly influence GM using strict criteria, including a very low  
229 P-value ( $<1 \times 10^{-5}$ ) [78], a 10000-kb window around a leading SNP, and  
230 minimal linkage disequilibrium (LD,  $r^2 < 0.001$ , kb=10000) with other  
231 nearby SNPs to minimize confounding effects. Additionally, the chosen  
232 SNPs had a minor allele frequency (MAF)  $> 0.01$  to ensure adequate  
233 statistical power. After this initial filtering, we further ensured that the  
234 variations were reflective of the effects of exposure on outcome; any  
235 SNPs with F-statistics  $< 10$  or failure to harmonize, including those

236 harboring incompatible alleles or palindromic characteristics with  
237 intermediate allele frequencies, were excluded. Correct inference  
238 direction from exposure to outcome was identified using the Steiger  
239 filtering approach, to lessen the influence of reverse association. Finally,  
240 we used the NHGRI-EBI Catalog (<https://www.ebi.ac.uk/gwas/>) to  
241 retrieve these SNPs and excluded SNPs related to confounding factors  
242 and outcomes (education, living habits, smoking, diet) [97]. Figure 1  
243 summarizes this selection process.

244

#### 245 4. Statistical analyses

246 We used R version 4.2.0 for all statistical analyses. We employed various  
247 statistical methodologies to evaluate the causal influence of GM on  
248 chronic pain phenotypes. Commonly used approaches included the  
249 multiplicative random effects–inverse-variance weighted (MRE-IVW)  
250 [56], weighted mode (WM) [26], weighted median (WME) [8], and  
251 MR-Egger regression [7]. Additionally, we incorporated more recent  
252 methods like contamination mixture (ConMix) [14], MR-robust adjusted  
253 profile score (MR-RAPS)[96], debiased inverse-variance weighted  
254 (dIVW) method [94], and cML-MA [93] to enhance the robustness of our  
255 findings. False discovery rate (FDR) correction was applied to strengthen  
256 the statistical power of the results. Given the potential bias in IVW  
257 estimation when pleiotropic IVs were utilized [13], several sensitivity

258 analyses were conducted to address pleiotropy in the causal estimates,  
259 including Cochran's Q statistic for heterogeneity ( $P > 0.05$ ) [9], MR-Egger  
260 regression for horizontal pleiotropy [7] and its intercept term ( $P > 0.05$ ),  
261 MR-PRESSO [84] for further evaluation of horizontal pleiotropy,  
262 leave-one-out analysis to evaluate the influence of individual SNPs on the  
263 observed associations, and power calculations using a non-centrality  
264 parameter-based approach [11] and publicly available mRnd web tool  
265 (<http://cnsgenomics.com/shiny/mRnd/>). Any results with evidence of  
266 confounding by pleiotropy were excluded (Online Methods). We also  
267 limited our analysis to pairs of variables supported by at least three  
268 genetic variants.

269 We used meta-analysis to identify the positive GM, which were then  
270 subjected to mediation analysis. To verify whether the screened positive  
271 GM and pain phenotype share the same causal variation in a given region  
272 (50 kb above and below each SNP), we employed genetic colocalization  
273 analysis (coloc). Furthermore, Bayesian weighted MR (BWMR) was  
274 implemented to strengthen the evidence for a causal relationship between  
275 the identified positive GM and pain phenotypes [95]. We also examined  
276 the impact of these potential positive GM on specific brain regions within  
277 the cerebral cortex.

278 To assess the potential mediating role of the intermediary effect (IE) on  
279 the relationship between the exposure (a) and the outcome (c'), we

280 conducted a mediation analysis using an interactive mediation framework  
281 and Sobel tests (<http://quantpsy.org/sobel/sobel.htm>) (Figure 1(b-2)). The  
282 IVW method was employed to estimate the causal effects, including IE  
283 ( $a*b$ ), direct effect (DE;  $c' - (a*b)$ ), and total effect (TE;  $c'$ ). Statistical  
284 significance was determined by a two-sided P-value threshold of 0.05.  
285 We employed FDR correction to account for multiple comparisons when  
286 evaluating statistical significance. Associations with an FDR of  $<0.05$   
287 were considered statistically significant. However, we expanded the  
288 p-value of the meta-analysis to 0.1 when no p-value was less than 0.05.  
289 We acknowledge the exploratory nature of this study and report both raw  
290 P and FDR values.

291

## 292 5 Results

### 293 5.1 Preliminary results of MR: GM on MCP and eight pain phenotypes

#### 294 5.1.1 GM on MCP

295 We observed that 4 taxa (2 orders and 2 families) were related to MCP in  
296 Data 1, 8 taxa (2 genera, 2 OTU97, 2 OTU99, and 2 TestASV) were  
297 related to MCP in Data 2, 11 taxa (1 phylum, 1 class, 1 order, 2 families,  
298 2 genera, and 4 species) were related to MCP in Data 3, and 18 taxa (1  
299 class, 2 orders, 1 family, 7 genera, and 7 unclassified) were related to  
300 MCP in Data 4. (see Supplementary 1)

301

### 302 5.1.2 GM on Headache

303 We observed that 7 taxa (1 phylum, 1 class, 1 order, 2 families, and 2  
304 genera) were related to headache in Data 1, 9 taxa (1 class, 1 order, 1  
305 family, 1 OTU97, 1 OTU99, and 4 TestASV) were related to headache in  
306 Data 2, 7 taxa (1 order, 1 family, 2 genera, and 3 species) were related to  
307 headache in Data 3, and 17 taxa (1 order, 2 families, 6 genera, 2 species,  
308 and 6 unclassified) were related to headache in Data 4.(see  
309 Supplementary 2)

310

### 311 5.1.3 GM on Facial Pain

312 We observed that 6 taxa (1 order, 2 families, and 3 genera) were related to  
313 facial pain in Data 1, 9 taxa (1 genus, 4 OTU97, 3 OTU99, and 1  
314 TestASV) were related to facial pain in Data 2, 5 taxa (1 family, 1 genus,  
315 and 3 species) were related to facial pain in Data 3, and 22 taxa (2 phyla,  
316 1 order, 2 families, 9 genera, 2 species, and 7 unclassified) were related to  
317 facial pain in Data 4. (see Supplementary 3)

318

### 319 5.1.4 GM on Neck/Shoulder Pain

320 We observed that 4 taxa (1 phylum, 2 families, and 1 genus) were related  
321 to neck/shoulder pain in Data 1, 5 taxa (1 class, 1 family, 1 OTU97, 1  
322 OTU99, and 1 TestASV) were related to neck/shoulder pain in Data 2, 5  
323 taxa (1 class, 1 order, 1 family, 1 genus, and 1 species) were related to



324 neck/shoulder pain in Data 3, and 20 taxa (1 family, 10 genera, 2 species,  
325 and 7 unclassified) were related to neck/shoulder pain in Data 4.(see  
326 Supplementary 4)

327

#### 328 5.1.5 GM on Abdominal Pain

329 We observed that 8 taxa (1 class, 2 orders, 2 families, and 3 genera) were  
330 related to abdominal pain in Data 1, 8 taxa (1 class, 1 genus, 3 OTU97, 2  
331 OTU99, and 1 TestASV) were related to abdominal pain in Data 2, 3 taxa  
332 (3 species) were related to abdominal pain in Data 3, and 19 taxa (2  
333 orders, 1 family, 9 genera, 3 species, and 4 unclassified) were related to  
334 abdominal pain in Data 4. (see Supplementary 5)

335

#### 336 5.1.6 GM on Back Pain

337 We observed that 5 taxa (1 phylum, 1 class, 1 order, and 2 genera) were  
338 related to back pain in Data 1, 6 taxa (1 family, 1 genus, 2 OTU97, and 2  
339 OTU99) were related to back pain in Data 2, 3 taxa (1 order, 1 family, and  
340 1 species) were related to back pain in Data 3, and 16 taxa (2 classes, 2  
341 families, 7 genera, 1 species, and 4 unclassified) were related to back pain  
342 in Data 4. (see Supplementary 6)

343

#### 344 5.1.7 GM on Hip Pain

345 We observed that 7 taxa (1 family and 6 genera) were related to hip pain

346 in Data 1, 8 taxa (3 OTU97, 3 OTU99, and 2 TestASV) were related to  
347 hip pain in Data 2, 8 taxa (1 family, 4 genera, and 3 species) were related  
348 to hip pain in Data 3, and 17 taxa (2 orders, 2 families, 8 genera, and 5  
349 unclassified) were related to hip pain in Data 4. (see Supplementary 7)

350

#### 351 5.1.8 GM on Knee Pain

352 We observed that 11 taxa (2 phyla, 2 classes, 3 orders, and 4 genera) were  
353 related to knee pain in Data 1, 3 taxa (3 OTU99) were related to knee  
354 pain in Data 2, 5 taxa (1 family and 4 genera) were related to knee pain in  
355 Data 3, and 21 taxa (2 orders, 5 families, 9 genera, and 5 unclassified)  
356 were related to knee pain in Data 4. (see Supplementary 8)

357

#### 358 5.1.9 GM on Pain All Over the Body

359 We observed that 5 taxa (5 genera) were related to pain all over the body  
360 in Data 1, 11 taxa (1 class, 1 order, 1 family, 2 OTU97, 5 OTU99, and 1  
361 TestASV) were related to pain all over the body in Data 2, 10 taxa (1  
362 class, 2 orders, 3 families, 2 genera, and 2 species) were related to pain all  
363 over the body in Data 3, and 21 taxa (11 genera, 3 species, and 7  
364 unclassified) were related to pain all over the body in Data 4. (see  
365 Supplementary 9)

366 After adjusting the p-values by FDR, Genus *Odoribacter* was still  
367 significantly associated with neck/shoulder pain ( $P_{IVW} = 1.203 \times 10^{-4}$ ,

368  $P_{\text{FDR}} = 0.048$ ).

369

370 5.2 Results of meta-analysis: GM on MCP and eight pain phenotypes

371 In the second step, we conducted a meta-analysis based on the

372 preliminary results from Section 5.1 in this exploratory study (see Table 2,

373 Figure 2 and 3).

374 **MCP:** The abundance of Genus *Adlercreutzia* ( $P_{\text{IVW}} = 3.71\text{E-}02$ ,  $P_{\text{Meta}} =$

375  $2.24\text{E-}02$ ) was positively associated with MCP, while that of Phylum

376 *Verrucomicrobia* ( $P_{\text{IVW}} = 1.90\text{E-}02$ ,  $P_{\text{Meta}} = 1.12\text{E-}02$ ) was negatively

377 associated with MCP.

378 **Headache:** The abundance of Phylum *Verrucomicrobia* ( $P_{\text{IVW}} = 2.02\text{E-}02$ ,

379  $P_{\text{Meta}} = 2.32\text{E-}02$ ) was negatively associated with headache.

380 **Facial Pain:** The abundances of Genus *Alistipes* ( $P_{\text{IVW}} = 1.17\text{E-}02$ ,  $P_{\text{Meta}} =$

381  $4.68\text{E-}02$ ) and Genus *Bifidobacterium* ( $P_{\text{IVW}} = 1.43\text{E-}02$ ,  $P_{\text{Meta}} = 4.48\text{E-}02$ )

382 were positively associated with facial pain.

383 **Neck/Shoulder Pain:** The abundances of Class *Alphaproteobacteria*

384 ( $P_{\text{IVW}} = 4.92\text{E-}02$ ,  $P_{\text{Meta}} = 1.17\text{E-}02$ ) and Genus *Odoribacter* ( $P_{\text{IVW}} =$

385  $1.20\text{E-}04$ ,  $P_{\text{Meta}} = 5.54\text{E-}05$ ) were negatively associated with

386 neck/shoulder pain.

387 **Abdominal Pain:** The abundances of Class *Gammaproteobacteria* ( $P_{\text{IVW}}$

388  $= 3.10\text{E-}02$ ,  $P_{\text{Meta}} = 1.95\text{E-}02$ ) and Species *Eubacterium eligens* ( $P_{\text{IVW}} =$

389  $3.72\text{E-}02$ ,  $P_{\text{Meta}} = 1.18\text{E-}02$ ) were positively associated with abdominal

390 pain, while that of Genus *Alistipes* ( $P_{IVW} = 3.46E-02$ ,  $P_{Meta} = 3.71E-02$ )  
391 was negatively associated with abdominal pain.

392 **Back Pain:** The abundance of Order *Bifidobacteriales* ( $P_{IVW} = 3.99E-02$ ,  
393  $P_{Meta} = 4.83E-02$ ) was positively associated with back pain.

394 **Pain All Over the Body:** The abundance of Genus *Ruminococcus2* ( $P_{IVW}$   
395  $= 1.46E-03$ ,  $P_{Meta} = 2.81E-03$ ) was positively associated with pain all over  
396 the body, while Genus *Desulfovibrio* ( $P_{IVW} = 7.01E-03$ ,  $P_{Meta} = 1.49E-02$ )  
397 was negatively associated with pain all over the body.

398 In this exploratory study, we expanded the P-value threshold for the  
399 meta-analysis to 0.1. The following associations were observed:

400 **Back Pain:** The abundance of Family *Prevotellaceae* ( $P_{IVW} = 1.15E-02$ ,  
401  $P_{Meta} = 5.20E-02$ ) was negatively associated with back pain.

402 **Hip Pain:** The abundance of Genus *Subdoligranulum* ( $P_{IVW} = 4.09E-02$ ,  
403  $P_{Meta} = 8.41E-02$ ) was negatively associated with hip pain.

404 **Knee Pain:** The abundance of Genus *Dialister* ( $P_{IVW} = 3.94E-02$ ,  $P_{Meta} =$   
405  $7.69E-02$ ) was negatively associated with knee pain.

406

407 5.3 Results of BWMR and coloc analysis: GM on MCP and eight pain  
408 phenotypes

409 To further strengthen the causal inference between the identified GM  
410 features and chronic pain phenotypes, we employed both BWMR and  
411 colocalization analyses. 13 positive GMs were still causally related to

412 MCP and eight pain phenotypes in BWMR, except for Class  
413 *Alphaproteobacteria* on neck/shoulder pain ( $P_{\text{BWMR}} = 5.73\text{E-}02$ ) (see  
414 Table 2).

415 The PP.H4.abf values of the 13 positive GMs ranged from 0.001691934  
416 to 0.055804256. No data were found in the target region for the  
417 remaining three positive GMs. Colocalization analysis findings further  
418 strengthened the causal relationship between positive GM and MCP and  
419 eight pain phenotypes (See Table 2 and 3, Figure 3 and 4).

420

421 5.4 Results of MR: GM on BID phenotypes and human cerebral cortex

422 5.4.1 GM on BID Phenotypes (see Supplementary 10)

423 5.4.1.1 Data 1

424 **Genus *Desulfovibrio***: Its abundance was positively associated with the  
425 rostral middle frontal area in the right hemisphere ( $P_{\text{IVW}} = 3.79\text{E-}02$ ) and  
426 negatively associated with rfMRI connectivity (ICA100 edge 1064) ( $P_{\text{IVW}}$   
427  $= 3.47\text{E-}02$ ), for which detailed information was not found.

428 **Genus *Ruminococcus2***: Its abundance was positively associated with the  
429 putamen volume in the right hemisphere ( $P_{\text{IVW}} = 2.94\text{E-}02$ ), insula  
430 volume in the left ( $P_{\text{IVW}} = 3.19\text{E-}02$ ) and right hemispheres ( $P_{\text{IVW}} =$   
431  $4.72\text{E-}02$ ), and G+S-occipital-inf area in the right hemisphere ( $P_{\text{IVW}} =$   
432  $2.17\text{E-}02$ ).

433 5.4.1.2 Data 2

434 **Class *Gammaproteobacteria***: Its abundance was positively associated  
435 with the medial geniculate nucleus (MGN) volume in the right  
436 hemisphere ( $P_{IVW} = 1.03E-02$ ) and negatively associated with the  
437 S-intrapariet+P-trans volume in the left hemisphere ( $P_{IVW} = 4.87E-02$ ), as  
438 well as positively associated with connectivity ICA100 edge 819 ( $P_{IVW} =$   
439  $4.90E-02$ ) and negatively associated with connectivity ICA100 edge 1063  
440 ( $P_{IVW} = 2.89E-02$ ), for which detailed information was not found.

441 **Family *Prevotellaceae***: Its abundance was positively associated with the  
442 weighted mean L1 in trace left posterior thalamic radiation ( $P_{IVW} =$   
443  $1.67E-02$ ).

444 5.4.1.3 Data 3

445 **Genus *Odoribacter***: Its abundance was positively associated with mean  
446 OD in the Fornix crescent+stria terminalis (left) ( $P_{IVW} = 1.49E-04$ ).

447 **Genus *Subdoligranulum***: Its abundance was positively associated with  
448 the weighted mean L2 in trace right cingulate gyrus part cingulum ( $P_{IVW} =$   
449  $3.00E-02$ ).

450 **Genus *Dialister***: Its abundance was negatively associated with the mean  
451 TH of G-pariet-inf-Supramar in the left hemisphere ( $P_{IVW} = 4.79E-02$ ).

452 **Order *Bifidobacteriales***: Its abundance was negatively associated with  
453 the hippocampal tail volume in the right hemisphere ( $P_{IVW} = 3.11E-03$ ).

454 5.4.1.4 Data 4

455 **Genus *Alistipes***: Its abundance was positively associated with the

456 weighted mean diffusion tensor mode (MO) in the left superior  
457 longitudinal fasciculus ( $P_{IVW} = 3.01E-02$ ) and mean OD in the Fornix  
458 crescent+stria terminalis (right) on fractional anisotropy (FA) skeleton  
459 ( $P_{IVW} = 4.94E-02$ ) and negatively associated with the mean TH of the  
460 posterior cingulate in the left hemisphere ( $P_{IVW} = 1.49E-02$ ), mean MO in  
461 the inferior cerebellar peduncle (left) on FA skeleton ( $P_{IVW} = 4.72E-02$ ),  
462 corticoamygdaloid transition volume in the right hemisphere ( $P_{IVW} =$   
463  $1.12E-03$ ), and medial orbitofrontal cortex volume in the left hemisphere  
464 ( $P_{IVW} = 4.02E-03$ ).

465 **Genus *Bifidobacterium***: Its abundance was positively associated with  
466 connectivity (ICA100 edge 405) ( $P_{IVW} = 2.31E-02$ ), for which detailed  
467 information was not found, and negatively associated with the mean TH  
468 of the parstriangularis ( $P_{IVW} = 1.69E-03$ ) and S-circular-insula-sup ( $P_{IVW}$   
469  $= 4.09E-03$ ) in the left hemisphere; mean TH of the G-insular-short in the  
470 right hemisphere ( $P_{IVW} = 3.36E-03$ ); mean OD in the body of the corpus  
471 callosum ( $P_{IVW} = 3.06E-02$ ) and Fornix crescent+stria terminalis (right)  
472 on the FA skeleton ( $P_{IVW} = 4.47E-02$ ); HATA volume ( $P_{IVW} = 5.89E-03$ )  
473 and area of isthmus cingulate ( $P_{IVW} = 2.66E-03$ ) in the left hemisphere;  
474 G-front-middle volume ( $P_{IVW} = 4.58E-02$ ), S-circular-insula-inf volume  
475 ( $P_{IVW} = 4.85E-02$ ), and area of superior temporal ( $P_{IVW} = 2.95E-02$ ) in the  
476 right hemisphere; and rfMRI amplitudes (ICA100 node 27) ( $P_{IVW} =$   
477  $5.89E-03$ ), for which detailed information was not found.

478

479 5.4.2 GM on the Human Cerebral Cortex (see Supplementary 11)

480 5.4.2.1 Data 1

481 **Genus *Desulfovibrio***: Its abundance was positively associated with mean  
482 SA of the paracentral ( $P_{IVW} = 4.57E-02$ ) and mean TH of the frontal pole  
483 ( $P_{IVW} = 2.60E-02$ ) and negatively associated with mean SA of the  
484 superior parietal ( $P_{IVW} = 3.48E-02$ ).

485 **Genus *Ruminococcus2***: Its abundance was positively associated with  
486 mean SA of the bankssts ( $P_{IVW} = 3.83E-02$ ) and fusiform ( $P_{IVW} =$   
487  $1.61E-02$ ).

488 **Phylum *Verrucomicrobia***: Its abundance was negatively associated with  
489 mean SA of the lateral orbitofrontal ( $P_{IVW} = 3.04E-02$ ).

490 5.4.2.2 Data 2

491 **Class *Gammaproteobacteria***: Its abundance was positively associated  
492 with mean SA of the bankssts ( $P_{IVW} = 4.80E-02$ ), paracentral ( $P_{IVW} =$   
493  $4.47E-02$ ), posterior cingulate ( $P_{IVW} = 1.97E-03$ ), and precentral ( $P_{IVW} =$   
494  $2.27E-02$ ) and negatively associated with the mean TH of the isthmus  
495 cingulate ( $P_{IVW} = 4.04E-02$ ).

496 **Family *Prevotellaceae***: Its abundance was negatively associated with  
497 mean TH of the inferior parietal ( $P_{IVW} = 2.33E-03$ ).

498 5.4.2.3 Data 3

499 **Genus *Odoribacter***: Its abundance was positively associated with the



500 mean TH of lateral occipital ( $P_{IVW} = 3.22E-02$ ) and negatively associated  
501 with the mean TH of superior frontal ( $P_{IVW} = 3.46E-02$ ).

502 **Genus *Subdoligranulum***: Its abundance was negatively associated with  
503 the mean TH of the rostral middle frontal cortex ( $P_{IVW} = 4.19E-02$ ).

504 **Genus *Dialister***: Its abundance was positively associated with the mean  
505 TH of middle temporal ( $P_{IVW} = 4.16E-02$ ) and negatively associated with  
506 the mean SA of inferior parietal ( $P_{IVW} = 4.91E-02$ ) and precentral ( $P_{IVW} =$   
507  $4.46E-02$ ).

508 **Species *E. eligens***: Its abundance was positively associated with the  
509 mean SA of posterior cingulate ( $P_{IVW} = 3.02E-02$ ).

510 **Phylum *Verrucomicrobia***: Its abundance was positively associated with  
511 global full SA ( $P_{IVW} = 4.83E-02$ ) and the mean SA of caudal middle  
512 frontal ( $P_{IVW} = 3.77E-02$ ), insula ( $P_{IVW} = 8.68E-03$ ), superior temporal  
513 ( $P_{IVW} = 3.40E-02$ ), and TH of postcentral ( $P_{IVW} = 2.87E-02$ ) and rostral  
514 anterior cingulate ( $P_{IVW} = 2.91E-02$ ) and negatively associated with the  
515 mean SA of pericalcarine ( $P_{IVW} = 3.32E-02$ ).

516 **Genus *Adlercreutzia***: Its abundance was positively associated with the  
517 mean SA of lateral occipital ( $P_{IVW} = 3.39E-02$ ).

518 5.4.2.4 Data 4

519 **Genus *Alistipes***: Its abundance was positively associated with the mean  
520 SA of lateral occipital ( $P_{IVW} = 2.61E-02$ ) and negatively associated with  
521 the mean SA of fusiform ( $P_{IVW} = 1.66E-03$ ) and postcentral ( $P_{IVW} =$

522 4.62E-02).

523 **Genus *Bifidobacterium***: Its abundance was positively associated with the  
524 mean TH of posterior cingulate ( $P_{IVW} = 4.32E-02$ ) and negatively  
525 associated with the mean SA of supramarginal ( $P_{IVW} = 1.83E-03$ ) and  
526 transverse temporal ( $P_{IVW} = 7.67E-03$ ).

527 5.4.2 GM on 83 Brain Regions (see Supplementary 12)

528 **Class *Gammaproteobacteria***: Its abundance was negatively associated  
529 with the left superior parietal volume ( $P_{IVW} = 3.07E-02$ ).

530 **Genus *Bifidobacterium***: Its abundance was negatively associated with  
531 the right caudal middle frontal volume ( $P_{IVW} = 1.97E-02$ ). No causal  
532 effects were observed for the other 13 genetic predispositions on 83 brain  
533 regions because their  $P_{IVW}$ s were  $>0.05$ .

534

535 5.5 Results of mediation analysis

536 5.5.1 GM on MCP and eight pain phenotypes (See Table 4, Fig 5,  
537 Supplementary 13)

538 Finally, we conducted a mediation analysis to explore the primary  
539 mediating GBA model of MCP and eight pain phenotypes based on  
540 Sections 5.2 and 5.3. Our findings indicate that the causal effect between  
541 Genus *Odoribacter* and neck/shoulder pain could be mediated by mean  
542 OD in Fornix cres + Stria terminalis (left) (Table 4). For Genus  
543 *Odoribacter* - mean OD in Fornix cres+Stria terminalis (left) -

544 neck/shoulder pain, TE = -0.020, IE = -0.003, DE = -0.017 (P = 0.027),  
545 IE\_div\_TE = 0.140 (0.013-0.267) (see Figure 5).

546

547 6. Discussion

548 6.1. GM and pain phenotypes

549 This study is the first to analyze the causal association of GM with MCP  
550 and eight pain phenotypes by MR, incorporating human brain structures.

551 Furthermore, we were able to establish a GBA model linking Genus  
552 *Odoribacter* to neck/shoulder pain. We identified 13 potential relevant

553 GM. Importantly, different pain phenotypes were causally associated with  
554 specific GM. Seven positive and eight negative causal associations were

555 found, among which Genus *Odoribacter* as a protective GM for  
556 neck/shoulder pain needs to be emphasized.

557 Previous MR studies did not identify GM overlapping with those within  
558 our study, except for Family *Prevotellaceae*. This discrepancy may stem

559 from previous studies predominantly focusing on specific pain-related  
560 diseases as outcomes, while our study examined pain phenotypes.

561 Notably, our study suggests that Family *Prevotellaceae* provides  
562 protection against back pain, whereas previous MR studies reported it

563 increases the risk of low back pain [23,78]. This difference could be  
564 attributed to variations in study outcomes and methodologies; previous

565 studies often utilized single GM databases, whereas we incorporated four

566 different GM databases and conducted a meta-analysis.

567 Meanwhile, our results suggest Phylum *Verrucomicrobia* and Genus  
568 *Dialister* are protective factors for CP, while Genus *Adlercreutzia* is risk  
569 factor, consistent with previous observational studies [18,23,30,40-41,85].  
570 Despite variations in associated pain sites, this reinforces the potential  
571 role of these GMs in pain pathogenesis. Conversely, previous  
572 observational studies involving Genus *Desulfovibrio*, Genus  
573 *Subdoligranulum*, and Genus *Odoribacter* have yielded inconsistent  
574 results [17,23,86-88]. Our study's findings may be more compelling due  
575 to its ability to establish causation, which observational studies cannot  
576 confirm definitively as they often have small sample sizes.

577 Interestingly, despite its probiotic properties in inhibiting pain behaviors  
578 [55], Genus *Bifidobacterium* was found to increase the risk of facial pain  
579 in our study, aligning with previous inconsistent findings [23,54,59].  
580 Similarly, Genus *Adlercreutzia*, recognized for its health benefits [10],  
581 has been associated with back pain [18] and identified as a risk factor for  
582 MCP in our study. A recent attempt to use *Bifidobacterium* in treating  
583 neuropathic pain was unsuccessful [28], suggesting that the effects of  
584 symbionts may be complicated through interactions with pathobionts that  
585 are associated with pain conditions. The role of GM in CP is complex,  
586 possibly involving differential effects within microbial networks [10].  
587 Future research may benefit from constructing gut microbial networks

588 based on key GMs to elucidate CP mechanisms.

589

590 6.2. The gut-brain axis

591 Pain is a dynamic interplay between sensory, emotional, and cognitive

592 factors [48] processed within the pain matrix-a network of interconnected

593 brain regions [15], especially CP. Emerging research suggests a potential

594 influence of GM in modulating pain perception [45]. Since changes in

595 brain structure can significantly affect its function [57], we investigated

596 the potential connection between GM and brain regions involved in pain

597 processing using brain imaging data. In general, except for Family

598 *Prevotellaceae*, Genus *Subdoligranulum*, Order *Bifidobacteriales*, and

599 Species *E. eligens*, the remaining positive GMs have been potentially

600 causally linked to the brain regions primarily involved in sensory,

601 emotional, and cognitive functions, which may help us partly understand

602 how GM affect CP.

603 Firstly, we found that multiple positive GM could affect the area of

604 pain-related cerebral cortex. In our study, the abundance of Phylum

605 *Verrucomicrobia*, a protective factor against MCP and headache, was not

606 only positively associated with the entire cortical area, but also positively

607 correlated with the area of caudal middle frontal and insula. This finding

608 extends the results of a recent study on CP utilizing the UK Biobank data

609 [5]. Other studies suggest that the anterior insula plays a more important

610 role in anticipating pain and its emotional features, while the posterior  
611 insula is more active during the physical sensations of pain [55, 58, 68].  
612 The observed protective effect of Phylum *Verrucomicrobia* on these  
613 regions aligns with the possibility that these bacteria might help in  
614 maintaining normal brain function related to pain perception. This finding  
615 offers a potential target for future research on chronic pain management  
616 strategies.

617 Furthermore, our study revealed that Genus *Desulfovibrio* was not only  
618 positively correlated with the area of rostral middle frontal cortex which  
619 are crucial for emotional and cognitive processing, but also positively  
620 correlated with the paracentral area and negatively with the  
621 superiorparietal area belonging sensorimotor cortices. As a protective  
622 factor for chronic multisite pain, the interaction between these affected  
623 brain areas deserves further exploration.

624 Secondly, we found that multiple positive GM could affect the thickness  
625 and volume of pain-related cerebral cortex. CP patients often show  
626 reduced gray matter volume in several brain regions, including areas  
627 involved in processing pain, managing emotions, and controlling  
628 movement [3-4,6,20,32,35,46-47,51-52,64,70-71,73,91]. Certain GM  
629 may have either positive or negative effects on the volume of these brain  
630 regions. For example, Phylum *Verrucomicrobia* abundance was  
631 associated with thicker gray matter in the rostral-anterior-cingulate and

632 postcentral regions, further supporting its protective role against CP.  
633 Additionally, multiple GM were found to significantly influence one  
634 brain region, such as the frontal lobe. This finding suggests that the  
635 observed decrease in gray matter volume in CP patients may result from  
636 the combined effects of multiple GM.

637 Thirdly, this study reveals that GM may influence chronic pain by  
638 affecting the integrity and direction of axonal fiber dispersion in white  
639 matter. CP patients often exhibit changes in the microstructure of white  
640 matter, like superior longitudinal fasciculus, corpus callosum, and  
641 cingulum bundle, which play crucial roles in pain severity, resilience and  
642 emotional response to pain [52,69,81,89]. Our results indicate that certain  
643 positive GM can positively (Genus *Subdoligranulum*-cingulum bundle  
644 (rh)) or negatively (Genus *Bifidobacterium*-corpus callosum) influence  
645 white matter in specific locations. Observational studies have also linked  
646 reduced white matter integrity in the splenium of the corpus callosum to  
647 chronic low back pain disability [12]. Our study found that Family  
648 *Prevotellaceae* abundance positively affected posterior-thalamic-radiation  
649 (lh), supporting its role as a protective factor against back pain.

650 Morphological changes in the limbic system are closely linked to  
651 persistent pain. Particularly, the Fornix cres+Stria terminalis region needs  
652 to be emphasized, which is positively affected by Genus *Odoribacter* and  
653 Genus *Alistipes* and negative affected by Genus *Bifidobacterium*. Notably,

654 our findings suggest that the causal relationship between Genus  
655 *Odoribacter* abundance and neck/shoulder pain may be mediated by  
656 mean OD in the Fornix cres+Stria terminalis (left).

657 The fornix, crucial for normal cognitive function [80], has also been  
658 associated with pain abnormalities [43]. Similarly, the stria terminalis is  
659 integral to the limbic system, connecting the amygdala to the  
660 hypothalamus. Although the fornix and stria terminalis are not directly  
661 connected, they create an indirect anatomical pathway between the  
662 hippocampus and the amygdala. Through shared connections to structures  
663 like the hypothalamus and septal nuclei, these regions can influence each  
664 other, forming a corticolimbic system critical in the initiation, persistence,  
665 and amplification of chronic pain states [1,83], and influencing the  
666 transition from acute to chronic pain [91]. Continued activation of  
667 corticolimbic circuits results in functional and anatomical changes in the  
668 cortex, contributing to prolonged pain states [91].

669 Our study identified new avenues for investigating the GBA in chronic  
670 pain and pain phenotypes. The Fornix cres+Stria terminalis is highlighted  
671 as a new factor in the GBA and a novel key area for CP (Genus  
672 *Odoribacter* to neck/shoulder pain). Targeted therapies focusing on these  
673 areas may offer innovative approaches to pain management and  
674 treatment.

675 There are some contradictions in the results: Genus *Alistipes* appears to



676 exert contrasting influences in abdominal and facial pain. Class  
677 *Gammaproteobacteria* abundance was positively correlated with the  
678 paracentral and precentral areas but acted as a risk factor for abdominal  
679 pain, and Genus *Dialister* abundance was negatively associated with the  
680 precentral area but served as a protective factor for knee pain. Various  
681 internal brain networks and regulatory systems collaboratively contribute  
682 to the experience and persistence of chronic pain [16,19,46]. Future  
683 research using multimodal fMRI to investigate how GM influences these  
684 brain network changes may provide insights into these findings.

685

686 Limitations and strengths

687 Our study has some advantages. First, we employed a comprehensive set  
688 of sensitivity analyses, including meta-analyses and colocalization  
689 analyses. These analyses provide strong evidence that our findings are  
690 robust. Second, we addressed potential biases by applying methods like  
691 MR-Egger and MR-PRESSO to assess pleiotropy (where a genetic  
692 variant influences multiple traits) and identify outliers. Those steps  
693 helped to ensure the reliability of our MR results. Finally, the analysis  
694 utilized powerful IVs (F-statistics > 10), minimizing the influence of  
695 weak instruments that could bias the MR results.

696 However, our study also has certain limitations. Firstly, the data  
697 originated from participants of European ancestry. Secondly, we did not

698 conduct reverse MR analyses or MR analyses directly analyzing the  
699 relationship between pain phenotypes and brain structure, which will be  
700 explored in future studies. Thirdly, to ensure a sufficient number of IVs  
701 for GM, we employed a significance threshold of  $P < 1 \times 10^{-5}$ , which is less  
702 stringent than the genome-wide significance level ( $P < 5 \times 10^{-8}$ ).

703

## 704 Conclusions

705 Among European ancestry, we identified 13 GM that were causally  
706 related to chronic pain; 8 GM decreased risk towards MCP and pain  
707 phenotypes, and 7 GM increased risk. Core GM may influence CP by  
708 affecting complex brain networks associated with emotional, cognitive,  
709 and motor functions. Specifically, we constructed a basic GBA model for  
710 neck/shoulder pain with Genus *Odoribacter* - Fornix cres+Stria  
711 terminalis (left) interactions playing a key role in neck/shoulder pain. Our  
712 study contributes to novel insights into the relationships between specific  
713 GM and pain phenotypes, supporting that GBA play a key role in the  
714 pathogenesis of CP. Consequently, the GBA is a new drug target to treat  
715 CP through neuroregulatory therapies and targeted treatments with  
716 protective symbionts.

717

## 718 Reference

719 [1] Apkarian A.V., Baliki M.N., Geha P.Y.,2009. Towards a theory of chronic pain.Prog

- 720 Neurobiol 87(2):81-97. doi: 10.1016/j.pneurobio.2008.09.018.
- 721 [2] Apkarian A.V., Bushnell M.C., Treede R.D., Zubieta J.K., 2005. Human brain mechanisms  
722 of pain perception and regulation in health and disease. Eur J Pain 9(4):463-84. doi:  
723 10.1016/j.ejpain.2004.11.001.
- 724 [3] Apkarian A.V., Sosa Y., Sonty S., Levy R.M., Harden R.N., Parrish T.B., Gitelman  
725 D.R.,2004.Chronic Back Pain Is Associated with Decreased Prefrontal and Thalamic Gray  
726 Matter Density. J Neurosci 24(46):10410-5. doi: 10.1523/JNEUROSCI.2541-04.2004.
- 727 [4] Bhatt R.R., Gupta A., Mayer E.A., Zeltzer L.K., 2020. Chronic pain in children: structural  
728 and resting-state functional brain imaging within a developmental perspective. Pediatr Res  
729 88(6):840-849. doi: 10.1038/s41390-019-0689-9. Epub 2019 Dec 2.
- 730 [5] Bhatt R.R., Haddad E., Zhu A.H., Thompson P.M., Gupta A., Mayer E.A., Jahanshad N.,  
731 2024. Mapping Brain Structure Variability in Chronic Pain: The Role of Widespreadness and  
732 Pain Type and its Mediating Relationship with Suicide Attempt. Biol Psychiatry  
733 95(5):473-481. doi: 10.1016/j.biopsych.2023.07.016.
- 734 [6] Borsook D., Erpelding N., Becerra L., 2013. Losses and gains: chronic pain and altered  
735 brain morphology. Expert Rev Neurother 13(11):1221-34. doi:  
736 10.1586/14737175.2013.846218.
- 737 [7] Bowden J., Davey Smith G., Burgess S., 2015. Mendelian randomization with invalid  
738 instruments: effect estimation and bias detection through Egger regression. Int. J. Epidemiol.  
739 44, 512–525.
- 740 [8] Bowden J., Davey Smith G., Haycock P.C., Burgess S., 2016. Consistent estimation in  
741 Mendelian randomization with some invalid instruments using a weighted median estimator.

- 742 Genet. Epidemiol. 40, 304–314.
- 743 [9] Bowden J., Fabiola Del Greco M., Minelli G., Smith G.D., Sheehan N., Thompson J.,  
744 2017. A framework for the investigation of pleiotropy in two-sample summary data  
745 Mendelian randomization. Stat. Med. 36, 1783–1802.
- 746 [10] Brandon-Mong G.J., Shaw G.T.W., Chen W.H., Chen C.C., Wang D., 2020. A network  
747 approach to investigating the key microbes and stability of gut microbial communities in a  
748 mouse neuropathic pain model. BMC Microbiol 20(1):295. doi: 10.1186/s12866-020-01981-7.
- 749 [11] Brion M.J., Shakhbazov K., Visscher P.M., 2013. Calculating statistical power in  
750 Mendelian randomization studies. Int. J. Epidemiol. 42, 1497–1501.
- 751 [12] Buckalew N., Haut M.W., Aizenstein H., Rosano C., Edelman K.D., Perera S., Marrow  
752 L., Tadic S., Venkatraman V., Weiner D., 2013. White matter hyperintensity burden and  
753 disability in older adults: is chronic pain a contributor? PM R 5(6):471-80; quiz 480. doi:  
754 10.1016/j.pmrj.2013.03.004.
- 755 [13] Burgess S., Butterworth A., Thompson S.G., 2013. Mendelian randomization analysis  
756 with multiple genetic variants using summarized data. Genet. Epidemiol. 37, 658–665.
- 757 [14] Burgess S., Foley C.N., Allara E., Staley J.R., Howson J.M.M., 2020. A robust and  
758 efficient method for Mendelian randomization with hundreds of genetic variants. Nat  
759 Commun 11(1):376. doi: 10.1038/s41467-019-14156-4.
- 760 [15] Bushnell M.C., Ceko M., Low L.A., 2013. Cognitive and emotional control of pain and  
761 its disruption in chronic pain. Nat Rev Neurosci 14(7):502-511. doi: 10.1038/nrn3516.
- 762 [16] Canavero S., Bonicalzi V., 2015. Pain myths and the genesis of central pain. Pain Med  
763 16(2):240-248. doi: 10.1111/pme.12509.

- 764 [17] Chriswell M.E., Lefferts A.R., Clay M.R., Hsu A.R., Seifert J., Feser M.L., Rims C.,  
765 Bloom M.S., Bemis E.A., Liu S., Maerz M.D., Frank D.N., Demoruelle M.K., Deane K.D.,  
766 James E.A., Buckner J.H., Robinson W.H., Holers V.M., Kuhn K.A., 2022. Clonal IgA and  
767 IgG autoantibodies from individuals at risk for rheumatoid arthritis identify an arthritogenic  
768 strain of Subdoligranulum. *Sci Transl Med* 14(668):eabn5166. doi:  
769 10.1126/scitranslmed.abn5166.
- 770 [18] Dekker Nitert M., Mousa A., Barrett H. L., Naderpoor N., de Courten B., 2020. Altered  
771 gut microbiota composition is associated with Back pain in overweight and obese individuals.  
772 *Front. Endocrinol.* 11:605. doi: 10.3389/fendo.2020.00605.
- 773 [19] Fitzcharles M.A., Cohen S.P., Clauw D.J., Littlejohn G., Usui C., Häuser W., 2021.  
774 Nociceptive pain: towards an understanding of prevalent pain conditions. *Lancet*  
775 397(10289):2098-2110. doi: 10.1016/S0140-6736(21)00392-5.
- 776 [20] Fritz J.H., Wittfeld K., Hegenscheid K., Schmidt C.O., Langner S., Lotze  
777 M., 2016. Chronic Back Pain Is Associated With Decreased Prefrontal and Anterior Insular  
778 Gray Matter: Results From a Population-Based Cohort Study. *J Pain* 17(1):111-8. doi:  
779 10.1016/j.jpain.2015.10.003.
- 780 [21] Fürtjes A.E., Arathimos R., Coleman J.R.I., Cole J.H., Cox S.R., Deary I.J., de la Fuente  
781 J., Madole J.W., Tucker-Drob E.M., Ritchie S.J., 2023. General dimensions of human brain  
782 morphometry inferred from genome-wide association data. *Hum Brain Mapp* 44(8):3311-3323.  
783 doi: 10.1002/hbm.26283.
- 784 [22] Geng Z.M., Wang J., Chen G.D., Liu J.C., Lan J., Zhang Z.P., Miao J., 2023. Gut  
785 microbiota and intervertebral disc degeneration: a bidirectional two-sample Mendelian

- 786 randomization study. *J Orthop Surg Res* 18(1):601. doi: 10.1186/s13018-023-04081-0.
- 787 [23] Goudman L., Demuyser T., Pilitsis J.G., Billot M., Roulaud M., Rigoard P., Moens M.,  
788 2024. Gut dysbiosis in patients with chronic pain: a systematic review and meta-analysis.  
789 *Front Immunol* 15:1342833. doi: 10.3389/fimmu.2024.1342833.
- 790 [24] Grasby K.L., Jahanshad N., Painter J.N., Colodro-Conde L., Bralten J., Hibar D.P., Lind  
791 P.A., et al., Genetics through Meta-Analysis Consortium - Genetics working group, 2020. The  
792 genetic architecture of the human cerebral cortex. *Science* 367(6484):eaay6690. doi:  
793 10.1126/science.aay6690.
- 794 [25] Grundy L., Erickson A., Brierley S.M., 2019. Visceral pain. *Annu Rev Physiol* 81:  
795 261-284. doi: 10.1146/annurev-physiol-020518-114525.
- 796 [26] Hartwig F.P., Smith G.D., Bowden J., 2017. Robust inference in summary data  
797 Mendelian randomization via the zero modal pleiotropy assumption. *Int. J. Epidemiol.* 46,  
798 1985–1998.
- 799 [27] Heiss C.N., Olofsson L.E., 2019. The role of the gut microbiota in development, function  
800 and disorders of the central nervous system and the enteric nervous system. *J*  
801 *Neuroendocrinol* *J Neuroendocrinol* 31(5):e12684. doi: 10.1111/jne.12684.
- 802 [28] Huang J., Zhang C., Wang J., Guo Q., Zou W., 2019. Oral *Lactobacillus reuteri* LR06 or  
803 *Bifidobacterium* BL5b supplement do not produce analgesic effects on neuropathic and  
804 inflammatory pain in rats. *Brain Behav* 9(4):e01260. doi: 10.1002/brb3.1260.
- 805 [29] Hui J.N., Chen Y.J., Li C.E., Gou Y.F., Liu Y., Zhou R.X., Kang M.J., Liu C., Wang B.Y.,  
806 Shi P.X., Cheng S.Q., Yang X.N., Pan C.Y., Jia Y.M., Cheng B.L., Liu H., Wen Y., Zhang F.,  
807 2023. Insight into the Causal Relationship between Gut Microbiota and Back Pain: A Two

808 Sample Bidirectional Mendelian Randomization Study. *Adv Genet (Hoboken)* 4(4):2300192.  
809 doi: 10.1002/ggn2.202300192.

810 [30] Ivashkin V., Shifrin O., Maslennikov R., Poluektova E., Korolev A., Kudryavtseva A.,  
811 Krasnov G., Benuni N., Barbara G., 2023. Eubiotic effect of rifaximin is associated with  
812 decreasing abdominal pain in symptomatic uncomplicated diverticular disease: results from  
813 an observational cohort study. *BMC Gastroenterol* 23(1):82. doi:  
814 10.1186/s12876-023-02690-x.

815 [31] Johnston K.J.A., Ward J., Ray P.R., Adams M.J., McIntosh A.M., Smith B.H.,  
816 Strawbridge R.J., Price T.J., Smith D.J., Nicholl B.I., Bailey M.E.S., 2021. Sex-stratified  
817 genome-wide association study of multisite chronic pain in UK Biobank. *PLoS Genet*  
818 17(4):e1009428. doi:10.1371/journal.pgen.1009428.

819 [32] Kang D., McAuley J.H., Kassem M.S., Gatt J.M., Gustin S.M., 2019. What does the grey  
820 matter decrease in the medial prefrontal cortex reflect in people with chronic pain? *Eur J Pain*  
821 23(2):203-219. doi: 10.1002/ejp.1304.

822 [33] Karczewski J., Troost F.J., Konings I., Dekker J., Kleerebezem M., Brummer R.J.M.,  
823 Wells J.M., 2010. Regulation of human epithelial tight junction proteins by *Lactobacillus*  
824 *plantarum* in vivo and protective effects on the epithelial barrier. *Am J Physiol Gastrointest*  
825 *Liver Physiol* 298(6):G851-9. doi: 10.1152/ajpgi.00327.2009.

826 [34] Kozak-Szkopek E., Broczek K., Slusarczyk P., Wieczorowska-Tobis K., Klich-Raczka A.,  
827 Szybalska A., Mossakowska M., 2017. Prevalence of chronic pain in the elderly polish  
828 population - results of the polsenior study. *Arch Med Sci* 13(5):1197-1206. doi: 10.5114/  
829 aoms.2015.55270.

- 830 [35] Kuchinad A., Schweinhardt P., Seminowicz D.A., Wood P.B., Chizh B.A., Bushnell  
831 M.C.,2007. Accelerated Brain Gray Matter Loss in Fibromyalgia Patients: Premature Aging  
832 of the Brain? *J Neurosci* 27(15):4004-7. doi: 10.1523/JNEUROSCI.0098-07.2007.
- 833 [36] Kurilshikov A., Medina-Gomez C., Bacigalupe R., et al., 2021. Large-scale association  
834 analyses identify host factors influencing human gut microbiome composition. *Nat Genet*  
835 53(2): 156-165. doi:10.1038/s41588-020-00763-1.
- 836 [37] Lawlor D.A., Harbord R.M., Sterne J.A.C., Timpson N., Smith G.D., 2008. Mendelian  
837 randomization: using genes as instruments for making causal inferences in  
838 epidemiology.*Stat Med* 27(8):1133-1163. doi: 10.1002/sim.3034.
- 839 [38] Lee Y.H., Song G.G., 2021. The Gut Microbiome and Osteoarthritis: A Two-Sample  
840 Mendelian Randomization Study.*J Rheum Dis* 28(2):94-100. doi: 10.4078/jrd.2021.28.2.94.
- 841 [39] Li H.F., Sheng D.H., Jin C.D., Zhao G.P., Zhang L., 2023. Identifying and ranking causal  
842 microbial biomarkers for colorectal cancer at different cancer subsites and stages: a  
843 Mendelian randomization study. *Front Oncol* 13:1224705. doi: 10.3389/fonc.2023.1224705.
- 844 [40] Li J.S., Su S.L., Xu Z., Zhao L.H., Fan R.Y., Guo J.M., Qian D.W., Duan J.A., 2022.  
845 Potential roles of gut microbiota and microbial metabolites in chronic inflammatory pain and  
846 the mechanisms of therapy drugs. *Ther Adv Chronic Dis.* 28:13:20406223221091177. doi:  
847 10.1177/20406223221091177.
- 848 [41] Li Y., Zhang S.X., Yin X.F., Zhang M.X., Qiao J., Xin X.H., Chang M.J., Gao C., Li Y.F.,  
849 Li X.F., 2021. The Gut Microbiota and Its Relevance to Peripheral Lymphocyte  
850 Subpopulations and Cytokines in Patients with Rheumatoid Arthritis. *J Immunol Res*  
851 2021:6665563. doi: 10.1155/2021/6665563.



- 852 [42] Liu B., Ye D., Yang H., Song J., Sun X.H., He Z.X., Mao Y.Y., Hao G.F., 2023. Assessing  
853 the relationship between GM and irritable bowel syndrome: a two-sample Mendelian  
854 randomization analysis. *BMC Gastroenterology* 23(1):150. doi: 10.1186/s12876-023-02791-7.
- 855 [43] Liu J., Zhu J., Yuan F., Zhang X., Zhang Q., 2018. Abnormal brain white matter in  
856 patients with right trigeminal neuralgia: a diffusion tensor imaging study. *J Headache Pain*  
857 19(1):46. doi: 10.1186/s10194-018-0871-1.
- 858 [44] Lopera-Maya E.A., Kurilshikov A., van der Graaf A., Hu S.X., Andreu-Sánchez S., Chen  
859 L.M., Vila A.V., Gacesa R., Sinha T., Collij V., Klaassen M.A.Y., Bolte L.A., Gois M.F.B.,  
860 Neerincx P.B.T., Swertz M.A., LifeLines Cohort Study, Harmsen H.J.M., Wijmenga C., Fu  
861 J.Y., Weersma R.K., Zhernakova A., Sanna S., 2022. Effect of host genetics on the gut  
862 microbiome in 7,738 participants of the Dutch microbiome project. *Nat Genet* 54(2):143-151.  
863 doi: 10.1038/s41588-021-00992-y.
- 864 [45] Luczynski P., Tramullas M., Viola M., Shanahan F., Clarke G., O'Mahony S., Dinan T.G.,  
865 Cryan J.F., 2017. Microbiota regulates visceral pain in the mouse. *Elife* 6:e25887. doi:  
866 10.7554/eLife.25887.
- 867 [46] Martucci K.T., MacKey S.C., 2018. Neuroimaging of Pain: Human Evidence and  
868 Clinical Relevance of Central Nervous System Processes and Modulation. *Anesthesiology*  
869 128(6):1241-1254. doi: 10.1097/ALN.0000000000002137.
- 870 [47] Mayer E.A., Gupta A., Kilpatrick L.A., Hong J.Y., 2015. Imaging brain mechanisms in  
871 chronic visceral pain. *Pain* 156 Suppl 1(0 1):S50-S63. doi:  
872 10.1097/j.pain.000000000000106.
- 873 [48] Melzack R., 2001. Pain and the neuromatrix in the brain. *J Dent Educ* 65(12):1378-1382.

- 874 [49] Meng W., Adams M.J., Reel P., Rajendrakumar A., Huang Y., Deary I.J., Palmer C.N.A.,  
875 McIntosh A.M., Smith B.H.,2020. Genetic correlations between pain phenotypes and  
876 depression and neuroticism. *Eur J Hum Genet* 28(3):358-366. doi:  
877 10.1038/s41431-019-0530-2.
- 878 [50] Minerbi A., Shen S., 2022. Gut microbiome in anesthesiology and pain medicine.  
879 *Anesthesiology* 137(1):93-108. doi:10.1097/ALN.0000000000004204.
- 880 [51] Mutso A.A., Radzicki D., Baliki M.N., Huang L., Banisadr G., Centeno M.V., Radulovic  
881 J., Martina M., Miller R.J., Apkarian A.V.,2012. Abnormalities in hippocampal functioning  
882 with persistent pain.*J Neurosci* 32(17):5747-56. doi: 10.1523/JNEUROSCI.0587-12.2012.
- 883 [52] Ng S.K., Urquhart D.M., Fitzgerald P.B., Cicuttini F.M., Hussain S.M., Fitzgibbon  
884 B.M.,2018.The Relationship Between Structural and Functional Brain Changes and Altered  
885 Emotion and Cognition in Chronic Low Back Pain Brain Changes A Systematic Review of  
886 MRI and fMRI Studies. *Clin J Pain* 34(3):237-261. doi: 10.1097/AJP.0000000000000534.
- 887 [53] O'Mahony S.M., Dinan T.G., Cryan J.F.,2017. The gut microbiota as a key regulator of  
888 visceral pain. *Pain* 158 Suppl 1:S19-S28. doi: 10.1097/j.pain.0000000000000779.
- 889 [54] Oh D.K., Na H.S., Jhun J.Y. Lee J.S., Um I.G., Lee S.Y., Park M.S., Cho M.L., Park  
890 S.H.,2023. Bifidobacterium longum BORI inhibits pain behavior and chondrocyte death, and  
891 attenuates osteoarthritis progression. *PLoS One* 18(6):e0286456. doi:  
892 10.1371/journal.pone.0286456.
- 893 [55] Ostrowsky K., Magnin M., Rylvlin P., Isnard J., Guenot M., Mauguiere F.,  
894 2002.Representation of pain and somatic sensation in the human insula: A study of responses  
895 to direct electrical cortical stimulation. *Cereb Cortex* 12(4):376-85. doi:

- 896 10.1093/cercor/12.4.376.
- 897 [56] Palmer T.M., Sterne J.A.C., Harbord R.M., Lawlor D.A., Sheehan N.A., Meng S.,  
898 Granel R., Smith G.D., Didelez V., 2011. Instrumental variable estimation of causal risk  
899 ratios and causal odds ratios in Mendelian randomization analyses. *Am. J. Epidemiol.* 173,  
900 1392-1403.
- 901 [57] Pang J.C., Aquino K.M., Oldehinkel M., Robinson P.A., Fulcher B.D., Breakspear M.,  
902 Fornito A., 2023. Geometric constraints on human brain function. *Nature* 618(7965):566-574.  
903 doi: 10.1038/s41586-023-06098-1.
- 904 [58] Ploghaus A., Tracey I., Gati J.S., Clare S., Menon R.S., Matthews P.M., Rawlins J.N.,  
905 1999. Dissociating pain from its anticipation in the human brain. *Science* 284(5422):1979-81.  
906 doi: 10.1126/science.284.5422.1979.
- 907 [59] Pratt C., Campbell M.D., 2020. The Effect of Bifidobacterium on Reducing Symptomatic  
908 Abdominal Pain in Patients with Irritable Bowel Syndrome: A Systematic Review. *Probiotics*  
909 *Antimicrob Proteins* 12(3):834-839. doi: 10.1007/s12602-019-09609-7.
- 910 [60] Qin Y.W., Havulinna A.S., Liu Y., Jousilahti P., Ritchie S.C., Tokolyi A., Sanders J.G.,  
911 Valsta L., Brożyńska M., Zhu Q.Y., Tripathi A., Vázquez-Baeza Y., Loomba R., Cheng S.S.,  
912 Jain M., Niiranen T., Lahti L., Knight R., Salomaa V., Inouye M., Méric G., 2022. Combined  
913 effects of host genetics and diet on human gut microbiota and incident disease in a single  
914 population cohort. *Nat Genet* 54(2):134-142. doi: 10.1038/s41588-021-00991-z.
- 915 [61] Ramakrishna C., Corleto J., Ruegger P.M., Logan G.D., Peacock B.B., Mendonca S.,  
916 Yamaki S., Adamson T., Ermel R., McKemy D., Borneman J., Cantin E.M., 2019. Dominant  
917 role of the gut microbiota in chemotherapy induced neuropathic pain. *Sci Rep* 9(1):20324. doi:

- 918 10.1038/s41598-019-56832-x.
- 919 [62] Ran Guo, Li-Hua Chen, Chungen Xing, Tong Liu, 2019. Pain regulation by gut  
920 microbiota: molecular mechanisms and therapeutic potential. *Br J Anaesth* 123 (5): 637-654.  
921 doi: 10.1016/j.bja.2019.07.026.
- 922 [63] Ren M., Lotfipour S., 2020. The role of the gut microbiome in opioid use, *Behav*  
923 *Pharmacol* 31(2&3):113-121. doi: 10.1097/FBP.0000000000000538.
- 924 [64] Rodriguez-Raecke R., Niemeier A., Ihle K., Ruether W., May A., 2009. Brain Gray  
925 Matter Decrease in Chronic Pain Is the Consequence and Not the Cause of Pain. *J Neurosci*  
926 29(44):13746-50. doi: 10.1523/JNEUROSCI.3687-09.2009
- 927 [65] Rühlemann M.C., Hermes B.M., Bang C., Doms S., Moitinho-Silva L., Thingholm L.B.,  
928 Frost F., Degenhardt F., Wittig M., Kässens J., Weiss F.U., Peters A., Neuhaus K., Völker  
929 U., Völzke H., Homuth G., Weiss S., Grallert H., Laudes M., Lieb W., Haller D.,  
930 Lerch M.M., Baines J.F., Franke A., 2021. Genome-wide association study in 8,956  
931 German individuals identifies influence of ABO histo-blood groups on gut microbiome. *Nat*  
932 *Genet* 53(2):147-155. doi: 10.1038/s41588-020-00747-1.
- 933 [66] Russo R., Cristiano C., Avagliano C., Caro C.D., Rana G.L., Raso G.M., Canani R.B.,  
934 Meli R., Calignano A., 2018. Gut-brain axis: role of lipids in the regulation of inflammation,  
935 pain and CNS diseases. *Curr Med Chem* 25(32):3930-3952. doi:  
936 10.2174/0929867324666170216113756.
- 937 [67] Sanderson E., 2021. Multivariable Mendelian randomization and mediation. *Cold Spring*  
938 *Harb Perspect Med* 11(2):a038984. <https://doi.org/10.1101/cshperspect.a038984>.
- 939 [68] Sawamoto N., Honda M., Okada T., Hanakawa T., Kanda M., Fukuyama H., Konishi J.,

- 940 Shibusaki H.,2000. Expectation of painenhances responses to nonpainful somatosensory  
941 stimulation in the anterior cingulate cortex and parietal operculum/posterior insula: An  
942 event-related functional magnetic resonance imaging study. *J Neurosci* 20(19):7438-45. doi:  
943 10.1523/JNEUROSCI.20-19-07438.2000.
- 944 [69] Schermuly I., Fellgiebel A., Wagner S., Yakushev I., Stoeter P., Schmitt R., Knickenberg  
945 R.J., Bleichner F., Beutel M.E., 2010. Association between cingulum bundle structure and  
946 cognitive performance: an observational study in major depression.*Eur Psychiatry*  
947 25(6):355-60. doi: 10.1016/j.eurpsy.2010.05.001.
- 948 [70] Schmidt-Wilcke T., Ganssbauer S., Neuner T., Bogdahn U., May A.,2008. Subtle grey  
949 matter changes between migraine patients and healthy controls. *Cephalalgia* 28(1):1-4. doi:  
950 10.1111/j.1468-2982.2007.01428.x.
- 951 [71] Seminowicz D.A., Labus J.S., Bueller J.A., Tillisch K., Naliboff B.D., Bushnell M.C.,  
952 Mayer E.A.,2010. Regional Gray Matter Density Changes in Brains of Patients With Irritable  
953 Bowel Syndrome. *Gastroenterology* 139(1):48-57.e2. doi: 10.1053/j.gastro.2010.03.049.
- 954 [72] Seminowicz D.A., Moayed M.,2017. The Dorsolateral Prefrontal Cortex in Acute and  
955 Chronic Pain. *J Pain* 18(9):1027-1035. doi: 10.1016/j.jpain.2017.03.008.
- 956 [73] Shiers S., Price T.J.,2020.Molecular, circuit, and anatomical changes in the prefrontal  
957 cortex in chronic pain. *Pain*. 161(8):1726-1729. doi: 10.1097/j.pain.000000000000189745.
- 958 [74] Silvestre M.P., Rodrigues A.M., Canhão H., Marques C., Teixeira D., Calhau C., Branco  
959 J., 2020. Cross-talk between diet-associated dysbiosis and hand osteoarthritis. *Nutrients*  
960 12(11):3469. doi: 10.3390/nu12113469.
- 961 [75] Smith S.M., Douaud G., Chen W., Hanayik T., AlfaroAlmagro F., Sharp K., Elliott L.T.,

- 962 2021. An expanded set of genome-wide association studies of brain imaging phenotypes in  
963 UK Biobank. *Nat Neurosci* 24(5):737-745. doi: 10.1038/s41593-021-00826-4.
- 964 [76] Sommer F., Bäckhed F., 2013. The gut microbiota--masters of host development and  
965 physiology. *Nat Rev Microbiol* 11(4):227-38. doi: 10.1038/nrmicro2974.
- 966 [80] Storey J.D., 2003. The positive false discovery rate: A Bayesian interpretation and the  
967 q-value. *Ann. Stat.* 31(6):2013–2035. DOI: 10.1214/aos/1074290335.
- 968 [77] Su M.C., Tang Y.D., Kong W.S., Zhang S.Y., Zhu T, 2023. Genetically supported  
969 causality between gut microbiota, gut metabolites and low back pain: a two-sample  
970 Mendelian randomization study. *Front Microbiol* 14:1157451. doi:  
971 10.3389/fmicb.2023.1157451.
- 972 [78] Theodorou V., Ait Belgnaoui A., Agostini S., Eutamene H., 2014. Effect of commensals  
973 and probiotics on visceral sensitivity and pain in irritable bowel syndrome. *Gut Microbe*  
974 5(3):430-436. doi: 10.4161/gmic.29796.
- 975 [79] Thomas A.G., Koumellis P., Dineen R.A., 2011. The Fornix in Health and Disease: An  
976 Imaging Review. *Radiographics*. 31(4):1107-21. doi: 10.1148/rg.314105729.
- 977 [80] Timmers I., Biggs E.E., Bruckert L., Tremblay-McGaw A.G., Zhang H., Borsook D.,  
978 Simons L.E., 2024. Probing white matter microstructure in youth with chronic pain and its  
979 relation to catastrophizing using neurite orientation dispersion and density imaging. *Pain* 8.  
980 doi: 10.1097/j.pain.0000000000003269.
- 981 [81] Treede R.D, Rief W., Barke A., Aziz Q., Bennett M.I., Benoliel R., Cohen M., Evers S.,  
982 [82] Finnerup N.B., First M.B., Giamberardino M.A., Kaasa S., Kosek E., Lavand'homme P.,  
983 Nicholas M., Perrot S., Scholz J., Schug S., Smith B.H., Svensson P., Vlaeyen J.W.S., Wang

- 984 Shuu-Jiun, 2015. A classification of chronic pain for ICD-11. *Pain* 156(6):1003-1007. doi:  
985 10.1097/j.pain.000000000000160.
- 986 [83] Vachon-Presseau E., Centeno M.V., Ren W., Berger S.E., Tetreault P., Ghantous M.,  
987 Baria A., Farmer M., Baliki M.N., Schnitzer T.J., Apkarian A.V., 2016. The Emotional Brain  
988 as a Predictor and Amplifier of Chronic Pain. *J Dent Res* 95(6):605-12. doi:  
989 10.1177/0022034516638027.
- 990 [84] Verbanck M., Chen C.Y., Neale B., D R., 2018. Detection of widespread horizontal  
991 pleiotropy in causal relationships inferred from Mendelian randomization between complex  
992 traits and diseases. *Nat Genet.* 50 (5), 693–698.
- 993 [85] Wang S., Zang M., Yang X., Lv L., Chen L., Cui J., Liu Y., Xia Y., Zhou N., Yang Z., Li  
994 Y., Shi B., 2023. Gut microbiome in men with chronic prostatitis/chronic pelvic pain  
995 syndrome: profiling and its predictive significance. *World J Urol* 41(11):3019-3026. doi:  
996 10.1007/s00345-023-04587-6.
- 997 [86] Wang X., Wu Y., Liu Y., Chen F., Chen S., Zhang F., Li S., Wang C., Gong Y., Huang R.,  
998 Hu M., Ning Y., Zhao H., Guo X., 2023. Altered gut microbiome profile in patients with  
999 knee osteoarthritis. *Front Microbiol* 14:1153424. doi: 10.3389/fmicb.2023.1153424.
- 1000 [87] Wu R., Wang D., Cheng L., Su R., Li B., Fan C., Gao C., Wang C., 2024. Impaired  
1001 immune tolerance mediated by reduced Tfr cells in rheumatoid arthritis linked to gut  
1002 microbiota dysbiosis and altered metabolites. *Arthritis Res Ther* 26(1):21. doi:  
1003 10.1186/s13075-023-03260-y.
- 1004 [88] Wu Z., Liu H., Yan E., Zhang X., Wang Y., Huang C., He T., Miao L., Yang L., Jiang R.,  
1005 Qi C., Liu C., Wang D., Yang C., 2023. *Desulfovibrio* confers resilience to the comorbidity of

- 1006 pain and anxiety in a mouse model of chronic inflammatory pain. *Psychopharmacology (Berl)*  
1007 240(1):87-100. doi: 10.1007/s00213-022-06277-4.
- 1008 [89] Xiao X., Ding M., Zhang Y.Q.,2021. Role of the Anterior Cingulate Cortex in  
1009 Translational Pain Research.*Neurosci Bull* 37(3):405-422. doi: 10.1007/s12264-020-00615-2.
- 1010 [90] Yang M.Y., Wan X.J., Zheng H.S., Xu K., Xie J.L., Yu H., Wang J.C., Xu P., 2023. No  
1011 Evidence of a Genetic Causal Relationship between Ankylosing Spondylitis and Gut  
1012 Microbiota: A Two-Sample Mendelian Randomization Study.*Nutrients* 15(4):1057. doi:  
1013 10.3390/nu15041057.
- 1014 [91] Yang S., Chang M.C., 2019.Chronic Pain: Structural and Functional Changes in Brain  
1015 Structures and Associated Negative Affective State.*Int J Mol Sci* ,20(13):3130. doi:  
1016 10.3390/ijms20133130.
- 1017 [92] Ye T., Shao J., Kang H., 2021. Debiased Inverse-Variance Weighted Estimator in  
1018 Two-Sample Summary-Data Mendelian Randomization. *The Annals of Statistics*, 49(4),  
1019 2079-2100. <https://arxiv.org/abs/1911.09802>.
- 1020 [93] Yin Q.Y., Zhu L., 2024. Does co-localization analysis reinforce the results of Mendelian  
1021 randomization? *Brain* 147(1):e7-e8. doi: 10.1093/brain/awad295.
- 1022 [94] Yu X.H., Yang Y.Q., Cao R.R., Bo L., Lei S.F., 2021. The causal role of gut microbiota in  
1023 development of osteoarthritis.*Osteoarthritis Cartilage* 29(12):1741-1750. doi:  
1024 10.1016/j.joca.2021.08.003.
- 1025 [95] Zhao J., Ming J., Hu X.H., Chen G., Liu J., Yang C., 2020. Bayesian weighted Mendelian  
1026 randomization for causal inference based on summary statistics. *Bioinformatics*  
1027 36(5):1501–1508. <https://doi.org/10.1093/bioinformatics/btz749>.



1028 [96] Zhao Q., Wang J., Hemani G., Bowden J., Small D.S., 2020. Statistical inference in  
1029 two-sample summary-data Mendelian randomization using robust adjusted profile score. Ann  
1030 Statist 48(3):1742-1769.<https://arxiv.org/abs/1801.09652>.

1031 [97] Zhou R., Zhang L., Sun Y., Yan J., Jiang H., 2023. Causal Associations between Dietary  
1032 Habits and Chronic Pain: A Two-Sample Mendelian Randomization Study. Nutrients  
1033 15(17):3709. doi: 10.3390/nu15173709.

1034

1035

1036

1037

1038

1039

1040

1041

1042

1043

1044

1045

1046

1047

1048

1049

1050

1051

1052

1053

1054

1055

1056

1057

1058

1059

Table 1 Description of GWAS summary statistics used for each phenotype.

| Phenotype | First author (year) | Consortium | Sample size          | Population |
|-----------|---------------------|------------|----------------------|------------|
| MCP       | Johnston (2019)     | UK Biobank | 387,649 participants | European   |
| Headache  | Meng (2020)         | UK Biobank | 74,761 cases and     | European   |

|                                  |                                    |                    |                                   |          |
|----------------------------------|------------------------------------|--------------------|-----------------------------------|----------|
|                                  |                                    |                    | 149,312 controls                  |          |
| Facial pain                      |                                    |                    | 2,610 cases and 149,312 controls  | European |
| Neck/shoulder pain               |                                    |                    | 53,994 cases and 149,312 controls | European |
| Abdominal pain                   |                                    |                    | 8,217 cases and 149,312 controls  | European |
| Back pain                        |                                    |                    | 4,3991 cases and 149,312 controls | European |
| Hip pain                         |                                    |                    | 10,116 cases and 149,312 controls | European |
| Knee pain                        |                                    |                    | 22,204 cases and 149,312 controls | European |
| Pain all over body               |                                    |                    | 5,670 cases and 149,312 controls  | European |
| Gut microbiota                   | Esteban A. Lopera-Maya (2022)      | NA                 | 7,738 participants                | European |
|                                  | Youwen Qin ( 2022 )                | FINRISK 2002 study | 5,959 participants                | European |
|                                  | Malte Christoph Rühlemann ( 2021 ) | NA                 | 8,956 participants                | European |
|                                  | Alexander Kurilshikov ( 2021 )     | NA                 | 13,266 participants               | European |
| Brain imaging-derived phenotypes | Stephen M Smith ( 2021 )           | UK Biobank         | 39,691 participants               | European |
| Human cerebral cortex            | Katrina L. Grasby (2020)           | ENIGMA             | 51,665 participants               | European |
| 83 brain-wide volumes            | Fürtjes, A. E. (2023)              | UK Biobank         | 36,778 participants               | European |

1060 Abbreviation: MCP: multi-site chronic pain; ENIGMA: Enhancing NeuroImaging

1061 Genetics through Meta-Analysis Consortium.

Table 2: Mendelian randomization results of positive gut microbiota abundance based on Meta analysis on MCP and 8 pain phenotypes

| Scoure                              | outcome             | exposure                      | method                                    | n SNP       | pval        | or          | or_lci95    | or_uci95    | Heterogeneity (Q_pval) | Pleiotropy (pval) | MR-Presso (pval) | Global Test (pval) | pval-Meta (after meta analysis for IVW) |  |
|-------------------------------------|---------------------|-------------------------------|-------------------------------------------|-------------|-------------|-------------|-------------|-------------|------------------------|-------------------|------------------|--------------------|-----------------------------------------|--|
| Data3: Esteban A. Lopera-Maya(2022) | MCP                 | Phylum Verrucomicrobia        | Inverse variance weighted                 | 15          | 0.01896235  | 0.982081572 | 0.967359461 | 0.997027737 | 0.320706194            | 0.996488375       | 0.034205687      | 0.356              | 0.011212335                             |  |
|                                     |                     |                               | MR Egger                                  | 15          | 0.705456547 | 0.981876022 | 0.894877276 | 1.077332667 | 0.255626493            |                   |                  |                    |                                         |  |
|                                     |                     |                               | Weighted median                           | 15          | 0.057206847 | 0.981224799 | 0.962243091 | 1.00058095  |                        |                   |                  |                    |                                         |  |
|                                     |                     |                               | Weighted mode                             | 15          | 0.239122587 | 0.979740585 | 0.948291179 | 1.012232988 |                        |                   |                  |                    |                                         |  |
|                                     |                     |                               | Contamination mixture method              | 15          | 0.025678249 | 0.979175831 | 0.964597802 | 0.993974179 |                        |                   |                  |                    |                                         |  |
|                                     |                     |                               | Robust adjusted profile score (RAPS)      | 15          | 0.013364658 | 0.98072196  | 0.965712745 | 0.99596445  |                        |                   |                  |                    |                                         |  |
|                                     |                     |                               | Debiased inverse-variance weighted method | 15          | 0.015269901 | 0.98123824  | 0.966337206 | 0.996369049 |                        |                   |                  |                    |                                         |  |
|                                     |                     |                               | Constrained maximum likelihood            | 15          | 0.066550807 | 0.982169094 | 0.963471499 | 1.001229543 |                        |                   |                  |                    |                                         |  |
|                                     |                     |                               | Bayesian Weighted Mendelian Randomization | 15          | 0.022821328 | 0.981130186 | 0.965168726 | 0.997355609 |                        |                   |                  |                    |                                         |  |
|                                     | Genus Adlercreutzia | Inverse variance weighted     | 7                                         | 0.037093537 | 1.017400871 | 1.001032702 | 1.034036681 | 0.715183867 | 0.401707082            | 0.038058782       | 0.7226667        | 0.022358123        |                                         |  |
|                                     |                     | MR Egger                      | 7                                         | 0.192938083 | 1.041980755 | 0.987605133 | 1.099350192 | 0.71909744  |                        |                   |                  |                    |                                         |  |
|                                     |                     | Weighted median               | 7                                         | 0.058954708 | 1.020411518 | 0.999235622 | 1.042036176 |             |                        |                   |                  |                    |                                         |  |
|                                     |                     | Weighted mode                 | 7                                         | 0.189889788 | 1.025196018 | 0.991917237 | 1.0595913   |             |                        |                   |                  |                    |                                         |  |
|                                     |                     | Contamination mixture method  | 7                                         | 0.054339369 | 1.023329817 | 1.003066529 | 1.04400245  |             |                        |                   |                  |                    |                                         |  |
|                                     |                     | Robust adjusted profile score | 7                                         | 0.053479635 | 1.017814924 | 0.9997351   | 1.036221714 |             |                        |                   |                  |                    |                                         |  |

|                                      |            |                        |                                           |    |             |             |             |             |             |             |             |           |             |  |
|--------------------------------------|------------|------------------------|-------------------------------------------|----|-------------|-------------|-------------|-------------|-------------|-------------|-------------|-----------|-------------|--|
|                                      |            |                        | (RAPS)                                    |    |             |             |             |             |             |             |             |           |             |  |
|                                      |            |                        | Debiased inverse-variance weighted method | 7  | 0.040380183 | 1.018270112 | 1.000793815 | 1.036051587 |             |             |             |           |             |  |
|                                      |            |                        | Constrained maximum likelihood            | 7  | 0.057065151 | 1.017608502 | 0.999475524 | 1.036070457 |             |             |             |           |             |  |
|                                      |            |                        | Bayesian Weighted Mendelian Randomization | 7  | 0.045085083 | 1.017709777 | 1.000384307 | 1.035335303 |             |             |             |           |             |  |
| Data1:Alexander Kurilshikov ( 2021 ) | headache   | Phylum Verrucomicrobia | Inverse variance weighted                 | 12 | 0.02014992  | 0.985462476 | 0.973363963 | 0.99771137  | 0.58688606  | 0.561706706 | 0.028666522 | 0.6193333 | 0.023188736 |  |
|                                      |            |                        | MR Egger                                  | 12 | 0.785329636 | 0.995130931 | 0.961681908 | 1.029743371 | 0.530259011 |             |             |           |             |  |
|                                      |            |                        | Weighted median                           | 12 | 0.106858612 | 0.985795464 | 0.968800933 | 1.00308811  |             |             |             |           |             |  |
|                                      |            |                        | Weighted mode                             | 12 | 0.219111487 | 0.983304873 | 0.958719669 | 1.008520535 |             |             |             |           |             |  |
|                                      |            |                        | Contamination mixture method              | 12 | 0.008827096 | 0.980101247 | 0.970349076 | 0.989951428 |             |             |             |           |             |  |
|                                      |            |                        | Robust adjusted profile score (RAPS)      | 12 | 0.015016258 | 0.983264178 | 0.969980401 | 0.996729875 |             |             |             |           |             |  |
|                                      |            |                        | Debiased inverse-variance weighted method | 12 | 0.02170849  | 0.984773151 | 0.971955041 | 0.997760305 |             |             |             |           |             |  |
|                                      |            |                        | Constrained maximum likelihood            | 12 | 0.045058541 | 0.984113094 | 0.968819988 | 0.999647607 |             |             |             |           |             |  |
|                                      |            |                        | Bayesian Weighted Mendelian Randomization | 12 | 0.019146516 | 0.984285304 | 0.971327448 | 0.997416023 |             |             |             |           |             |  |
| Data4:Youwen Qin ( 2022 )            | facialpain | Genus Alistipes        | Inverse variance weighted                 | 17 | 0.011651233 | 1.004199247 | 1.000934924 | 1.007474215 | 0.474966723 | 0.538356301 | 0.021510576 | 0.5016667 | 0.046806403 |  |
|                                      |            |                        | MR Egger                                  | 17 | 0.537663714 | 1.0022328   | 0.995311407 | 1.009202324 | 0.431189248 |             |             |           |             |  |
|                                      |            |                        | Weighted median                           | 17 | 0.189311535 | 1.003137479 | 0.998456215 | 1.00784069  |             |             |             |           |             |  |
|                                      |            |                        | Weighted mode                             | 17 | 0.80601021  | 1.000789299 | 0.994610039 | 1.007006948 |             |             |             |           |             |  |

|                     |                 |                     |                                           |    |             |             |             |             |             |             |            |       |             |  |
|---------------------|-----------------|---------------------|-------------------------------------------|----|-------------|-------------|-------------|-------------|-------------|-------------|------------|-------|-------------|--|
|                     |                 |                     | Contamination mixture method              | 17 | 1           | 1.005532274 | 1.005532274 | 1.005532274 |             |             |            |       |             |  |
|                     |                 |                     | Robust adjusted profile score (RAPS)      | 17 | 0.024136725 | 1.004095569 | 1.000534747 | 1.007669063 |             |             |            |       |             |  |
|                     |                 |                     | Debiased inverse-variance weighted method | 17 | 0.012698904 | 1.004400835 | 1.000938026 | 1.007875624 |             |             |            |       |             |  |
|                     |                 |                     | Constrained maximum likelihood            | 17 | 0.039775642 | 1.004207257 | 1.000196194 | 1.008234405 |             |             |            |       |             |  |
|                     |                 |                     | Bayesian Weighted Mendelian Randomization | 17 | 0.014207917 | 1.00447811  | 1.000896887 | 1.008072146 |             |             |            |       |             |  |
|                     | Genus           |                     |                                           |    |             |             |             |             |             |             |            |       |             |  |
|                     | Bifidobacterium |                     | Inverse variance weighted                 | 16 | 0.014300484 | 1.004167659 | 1.000831637 | 1.007514802 | 0.626808686 | 0.772838386 | 0.01768728 | 0.668 | 0.044816124 |  |
|                     |                 |                     | MR Egger                                  | 16 | 0.455993731 | 1.003090012 | 0.995209617 | 1.011032806 | 0.558563741 |             |            |       |             |  |
|                     |                 |                     | Weighted median                           | 16 | 0.152348849 | 1.003594074 | 0.998675608 | 1.008536764 |             |             |            |       |             |  |
|                     |                 |                     | Weighted mode                             | 16 | 0.552709661 | 1.002031766 | 0.99548966  | 1.008616865 |             |             |            |       |             |  |
|                     |                 |                     | Contamination mixture method              | 16 | 0.127246974 | 1.008339777 | 1.003310661 | 1.013394101 |             |             |            |       |             |  |
|                     |                 |                     | Robust adjusted profile score (RAPS)      | 16 | 0.023488461 | 1.004226444 | 1.000568722 | 1.007897536 |             |             |            |       |             |  |
|                     |                 |                     | Debiased inverse-variance weighted method | 16 | 0.015670281 | 1.00437376  | 1.000824792 | 1.007935313 |             |             |            |       |             |  |
|                     |                 |                     | Constrained maximum likelihood            | 16 | 0.02392076  | 1.004198498 | 1.000553734 | 1.007856539 |             |             |            |       |             |  |
|                     |                 |                     | Bayesian Weighted Mendelian Randomization | 16 | 0.017127221 | 1.004392469 | 1.000779751 | 1.008018227 |             |             |            |       |             |  |
| Data2:Malte         |                 |                     |                                           |    |             |             |             |             |             |             |            |       |             |  |
| Christoph Rühlemann | neckshoulderpa  | Class               |                                           |    |             |             |             |             |             |             |            |       |             |  |
| ( 2021 )            | in              | Alphaproteobacteria | Inverse variance weighted                 | 9  | 0.049427264 | 0.992671151 | 0.985414044 | 0.999981703 | 0.664447486 | 0.484943501 | 0.05058963 | 0.679 | 0.011661252 |  |

|                                     |                   |                   |                                           |    |             |             |             |             |             |             |            |           |          |
|-------------------------------------|-------------------|-------------------|-------------------------------------------|----|-------------|-------------|-------------|-------------|-------------|-------------|------------|-----------|----------|
|                                     |                   |                   | MR Egger                                  | 9  | 0.28445787  | 0.980833171 | 0.949252346 | 1.013464662 | 0.62307216  |             |            |           |          |
|                                     |                   |                   | Weighted median                           | 9  | 0.023221186 | 0.98882251  | 0.979271083 | 0.998467098 |             |             |            |           |          |
|                                     |                   |                   | Weighted mode                             | 9  | 0.161788776 | 0.987787362 | 0.972473302 | 1.003342582 |             |             |            |           |          |
|                                     |                   |                   | Contamination mixture method              | 9  | 0.025093216 | 0.98983035  | 0.984893551 | 0.994791896 |             |             |            |           |          |
|                                     |                   |                   | Robust adjusted profile score (RAPS)      | 9  | 0.063302791 | 0.992397015 | 0.984435271 | 1.000423151 |             |             |            |           |          |
|                                     |                   |                   | Debiased inverse-variance weighted method | 9  | 0.052076005 | 0.992315926 | 0.98462249  | 1.000069476 |             |             |            |           |          |
|                                     |                   |                   | Constrained maximum likelihood            | 9  | 0.077646356 | 0.992485038 | 0.984203677 | 1.000836082 |             |             |            |           |          |
|                                     |                   |                   | Bayesian Weighted Mendelian Randomization | 9  | 0.057327506 | 0.992487255 | 0.984799649 | 1.000234872 |             |             |            |           |          |
| Data3: Esteban A. Lopera-Maya(2022) | neckshoulderpa in | Genus Odoribacter | Inverse variance weighted                 | 11 | 0.000120392 | 0.980127005 | 0.970149998 | 0.990206616 | 0.393943934 | 0.555697627 | 0.00323682 | 0.4533333 | 5.54E-05 |
|                                     |                   |                   | MR Egger                                  | 11 | 0.162045887 | 0.967679887 | 0.927623131 | 1.009466379 | 0.340467459 |             |            |           |          |
|                                     |                   |                   | Weighted median                           | 11 | 0.053994863 | 0.98629622  | 0.972549527 | 1.000237219 |             |             |            |           |          |
|                                     |                   |                   | Weighted mode                             | 11 | 0.300401396 | 0.98699109  | 0.964066825 | 1.010460464 |             |             |            |           |          |
|                                     |                   |                   | Contamination mixture method              | 11 | 0.007229237 | 0.97100033  | 0.956544019 | 0.985675121 |             |             |            |           |          |
|                                     |                   |                   | Robust adjusted profile score (RAPS)      | 11 | 0.000230236 | 0.979284948 | 0.968437306 | 0.990254097 |             |             |            |           |          |
|                                     |                   |                   | Debiased inverse-variance weighted method | 11 | 0.000140566 | 0.979169955 | 0.968616033 | 0.989838871 |             |             |            |           |          |
|                                     |                   |                   | Constrained maximum likelihood            | 11 | 0.000765214 | 0.980860944 | 0.969882614 | 0.99196354  |             |             |            |           |          |
|                                     |                   |                   | Bayesian Weighted Mendelian Randomization | 11 | 0.000227424 | 0.979176678 | 0.96828247  | 0.990193458 |             |             |            |           |          |

|                                              |               |                                              |                           |    |             |             |             |             |             |             |             |           |             |             |             |             |             |             |            |  |
|----------------------------------------------|---------------|----------------------------------------------|---------------------------|----|-------------|-------------|-------------|-------------|-------------|-------------|-------------|-----------|-------------|-------------|-------------|-------------|-------------|-------------|------------|--|
| Data2:Malte                                  |               |                                              |                           |    |             |             |             |             |             |             |             |           |             |             |             |             |             |             |            |  |
| Christoph Rühlmann<br>( 2021 )               | abdominalpain | Class                                        | Inverse variance weighted | 12 | 0.030973525 | 1.005120662 | 1.000467477 | 1.00979549  | 0.257858001 | 0.104285968 | 0.053022345 | 0.4586667 | 0.019528997 |             |             |             |             |             |            |  |
|                                              |               | Gammaproteobacteria                          |                           |    |             |             |             |             |             |             |             |           |             |             |             |             |             |             |            |  |
|                                              |               | MR Egger                                     |                           |    |             |             |             |             |             |             |             |           |             | 12          | 0.038938744 | 1.020021487 | 1.003470424 | 1.036845541 | 0.41590708 |  |
|                                              |               | Weighted median                              |                           |    |             |             |             |             |             |             |             |           |             | 12          | 0.070074263 | 1.006186368 | 0.999494298 | 1.012923244 |            |  |
|                                              |               | Weighted mode                                |                           |    |             |             |             |             |             |             |             |           |             | 12          | 0.183251476 | 1.009335192 | 0.99647498  | 1.022361375 |            |  |
|                                              |               | Contamination mixture method                 |                           |    |             |             |             |             |             |             |             |           |             | 12          | 0.057007608 | 1.006511955 | 1.001491956 | 1.011557117 |            |  |
|                                              |               | Robust adjusted profile score<br>(RAPS)      |                           |    |             |             |             |             |             |             |             |           |             | 12          | 0.035110906 | 1.005738824 | 1.000399513 | 1.011106631 |            |  |
|                                              |               | Debiased inverse-variance<br>weighted method |                           |    |             |             |             |             |             |             |             |           |             | 12          | 0.033133464 | 1.00538201  | 1.000429562 | 1.010358973 |            |  |
|                                              |               | Constrained maximum<br>likelihood            |                           |    |             |             |             |             |             |             |             |           |             | 12          | 0.079473129 | 1.005133531 | 0.999398    | 1.010901978 |            |  |
|                                              |               | Bayesian Weighted Mendelian<br>Randomization |                           |    |             |             |             |             |             |             |             |           |             | 12          | 0.038580029 | 1.00536023  | 1.00028079  | 1.010465463 |            |  |
| Data3: Esteban A.<br>Lopera-Maya(2022)       | abdominalpain | Specie                                       | Inverse variance weighted | 14 | 0.037170702 | 1.005438062 | 1.000322462 | 1.010579824 | 0.502554055 | 0.221626957 | 0.051738488 | 0.515     | 0.011809517 |             |             |             |             |             |            |  |
| Eubacterium_eligens                          |               |                                              |                           |    |             |             |             |             |             |             |             |           |             |             |             |             |             |             |            |  |
| MR Egger                                     |               | 14                                           |                           |    |             |             |             |             |             |             |             |           |             | 0.10869721  | 1.019849581 | 0.997428279 | 1.042774893 | 0.5594664   |            |  |
| Weighted median                              |               | 14                                           |                           |    |             |             |             |             |             |             |             |           |             | 0.505238304 | 1.002367504 | 0.995418862 | 1.009364651 |             |            |  |
| Weighted mode                                |               | 14                                           |                           |    |             |             |             |             |             |             |             |           |             | 0.837825764 | 1.001287055 | 0.98927152  | 1.013448529 |             |            |  |
| Contamination mixture method                 |               | 14                                           |                           |    |             |             |             |             |             |             |             |           |             | 1           | 1.000623339 | 0.99066697  | 1.01067977  |             |            |  |
| Robust adjusted profile score<br>(RAPS)      |               | 14                                           |                           |    |             |             |             |             |             |             |             |           |             | 0.051240949 | 1.005532469 | 0.999970161 | 1.011125717 |             |            |  |
| Debiased inverse-variance<br>weighted method |               | 14                                           |                           |    |             |             |             |             |             |             |             |           |             | 0.038767366 | 1.00570398  | 1.000293556 | 1.011143669 |             |            |  |
| Constrained maximum                          |               | 14                                           |                           |    |             |             |             |             |             |             |             |           |             | 0.093423765 | 1.005277789 | 0.999114315 | 1.011479285 |             |            |  |

|                                            |               |                       |                                              |    |             |             |             |             |             |             |             |           |             |
|--------------------------------------------|---------------|-----------------------|----------------------------------------------|----|-------------|-------------|-------------|-------------|-------------|-------------|-------------|-----------|-------------|
|                                            |               |                       | likelihood                                   |    |             |             |             |             |             |             |             |           |             |
|                                            |               |                       | Bayesian Weighted Mendelian                  | 14 | 0.040918523 | 1.005642054 | 1.000232176 | 1.011081192 |             |             |             |           |             |
|                                            |               |                       | Randomization                                |    |             |             |             |             |             |             |             |           |             |
| Data4:Youwen Qin<br>( 2022 )               | abdominalpain | Genus Alistipes       | Inverse variance weighted                    | 17 | 0.034563673 | 0.994119526 | 0.988696879 | 0.999571914 | 0.595696913 | 0.491111695 | 0.038413382 | 0.574     | 0.037071944 |
|                                            |               |                       | MR Egger                                     | 17 | 0.708480803 | 0.997760439 | 0.98632101  | 1.009332543 | 0.560486256 |             |             |           |             |
|                                            |               |                       | Weighted median                              | 17 | 0.048097332 | 0.992333679 | 0.984789425 | 0.999935728 |             |             |             |           |             |
|                                            |               |                       | Weighted mode                                | 17 | 0.127483607 | 0.990001778 | 0.977946691 | 1.002205467 |             |             |             |           |             |
|                                            |               |                       | Contamination mixture method                 | 17 | 0.034975212 | 0.991745545 | 0.986799194 | 0.99671669  |             |             |             |           |             |
|                                            |               |                       | Robust adjusted profile score<br>(RAPS)      | 17 | 0.044606378 | 0.993596395 | 0.987386484 | 0.999845361 |             |             |             |           |             |
|                                            |               |                       | Debiased inverse-variance<br>weighted method | 17 | 0.03613241  | 0.993838748 | 0.988110081 | 0.999600628 |             |             |             |           |             |
|                                            |               |                       | Constrained maximum<br>likelihood            | 17 | 0.121487814 | 0.994274893 | 0.987075638 | 1.001526656 |             |             |             |           |             |
|                                            |               |                       | Bayesian Weighted Mendelian<br>Randomization | 17 | 0.032859932 | 0.993535441 | 0.98763423  | 0.999471912 |             |             |             |           |             |
| Data2:Malte<br>Christoph Rühle<br>( 2021 ) | backpain      | Family Prevotellaceae | Inverse variance weighted                    | 10 | 0.011517883 | 0.987829799 | 0.978490852 | 0.997257879 | 0.891323316 | 0.530430988 | 0.005238675 | 0.8936667 | 0.051986091 |
|                                            |               |                       | MR Egger                                     | 10 | 0.297118662 | 0.971426794 | 0.923174937 | 1.022200644 | 0.869537076 |             |             |           |             |
|                                            |               |                       | Weighted median                              | 10 | 0.029422081 | 0.98696447  | 0.975377877 | 0.9986887   |             |             |             |           |             |
|                                            |               |                       | Weighted mode                                | 10 | 0.378620097 | 0.990542242 | 0.970817122 | 1.010668138 |             |             |             |           |             |
|                                            |               |                       | Contamination mixture method                 | 10 | 0.020401764 | 0.980987337 | 0.971226349 | 0.990846423 |             |             |             |           |             |
|                                            |               |                       | Robust adjusted profile score<br>(RAPS)      | 10 | 0.020085431 | 0.987569712 | 0.977209839 | 0.998039415 |             |             |             |           |             |



|                                        |                                           |                            |                                           |                           |             |             |             |             |             |             |             |             |             |             |
|----------------------------------------|-------------------------------------------|----------------------------|-------------------------------------------|---------------------------|-------------|-------------|-------------|-------------|-------------|-------------|-------------|-------------|-------------|-------------|
| Data3: Esteban A.<br>Lopera-Maya(2022) | backpain                                  | Order<br>Bifidobacteriales | Debiased inverse-variance weighted method | 10                        | 0.012991938 | 0.987238155 | 0.977283441 | 0.997294269 |             |             |             |             |             |             |
|                                        |                                           |                            | Constrained maximum likelihood            | 10                        | 0.008733108 | 0.987475255 | 0.978216471 | 0.996821674 |             |             |             |             |             |             |
|                                        |                                           |                            | Bayesian Weighted Mendelian Randomization | 10                        | 0.014859254 | 0.987611206 | 0.977753888 | 0.997567903 |             |             |             |             |             |             |
|                                        |                                           |                            | Inverse variance weighted                 | 10                        | 0.024781716 | 1.012196355 | 1.001539132 | 1.022966979 | 0.526108983 | 0.63667517  | 0.041967538 | 0.5563333   | 0.048289803 |             |
|                                        |                                           |                            | MR Egger                                  | 10                        | 0.966149481 | 1.001018758 | 0.956415205 | 1.04770245  | 0.449356295 |             |             |             |             |             |
|                                        |                                           |                            | Weighted median                           | 10                        | 0.413260679 | 1.006131903 | 0.99150478  | 1.020974812 |             |             |             |             |             |             |
|                                        |                                           |                            | Weighted mode                             | 10                        | 0.802039262 | 1.002851983 | 0.981406648 | 1.024765934 |             |             |             |             |             |             |
|                                        | Contamination mixture method              | 10                         | 0.308472923                               | 1.008921833               | 0.984011464 | 1.034462811 |             |             |             |             |             |             |             |             |
|                                        | Robust adjusted profile score (RAPS)      | 10                         | 0.042078684                               | 1.012099554               | 1.000430474 | 1.023904743 |             |             |             |             |             |             |             |             |
|                                        | Debiased inverse-variance weighted method | 10                         | 0.026789964                               | 1.012802431               | 1.001463371 | 1.024269877 |             |             |             |             |             |             |             |             |
|                                        | Constrained maximum likelihood            | 10                         | 0.047783882                               | 1.012384076               | 1.000119932 | 1.024798611 |             |             |             |             |             |             |             |             |
|                                        | Bayesian Weighted Mendelian Randomization | 10                         | 0.026833505                               | 1.01280865                | 1.001460851 | 1.024285035 |             |             |             |             |             |             |             |             |
|                                        | Data3: Esteban A.<br>Lopera-Maya(2022)    | hippain                    | Genus<br>Subdoligranulum                  | Inverse variance weighted | 14          | 0.040941121 | 0.994016288 | 0.988312462 | 0.999753032 | 0.695222364 | 0.93872199  | 0.036393135 | 0.7083333   | 0.084123458 |
|                                        |                                           |                            |                                           | MR Egger                  | 14          | 0.595713927 | 0.993044007 | 0.968427048 | 1.018286718 | 0.617883741 |             |             |             |             |
| Weighted median                        |                                           |                            |                                           | 14                        | 0.133654032 | 0.994184607 | 0.986635995 | 1.001790972 |             |             |             |             |             |             |
| Weighted mode                          |                                           |                            |                                           | 14                        | 0.481602733 | 0.995351087 | 0.982882144 | 1.007978212 |             |             |             |             |             |             |
| Contamination mixture method           |                                           |                            |                                           | 14                        | 0.033443546 | 0.98834282  | 0.983413439 | 0.993296909 |             |             |             |             |             |             |

|                                           |                    |                     |                                           |             |             |             |             |             |             |             |             |           |             |  |
|-------------------------------------------|--------------------|---------------------|-------------------------------------------|-------------|-------------|-------------|-------------|-------------|-------------|-------------|-------------|-----------|-------------|--|
| Data3: Esteban A. Lopera-Maya(2022)       | kneepain           | Genus Dialister     | Robust adjusted profile score (RAPS)      | 14          | 0.039933534 | 0.993417293 | 0.987177566 | 0.99969646  |             |             |             |           |             |  |
|                                           |                    |                     | Debiased inverse-variance weighted method | 14          | 0.042583569 | 0.993725818 | 0.987698746 | 0.999789668 |             |             |             |           |             |  |
|                                           |                    |                     | Constrained maximum likelihood            | 14          | 0.072849614 | 0.993995135 | 0.987475018 | 1.000558302 |             |             |             |           |             |  |
|                                           |                    |                     | Bayesian Weighted Mendelian Randomization | 14          | 0.045143324 | 0.993833092 | 0.987836335 | 0.999866253 |             |             |             |           |             |  |
|                                           |                    |                     | Inverse variance weighted                 | 6           | 0.039429035 | 0.991862294 | 0.984179924 | 0.999604631 | 0.943919259 | 0.544618433 | 0.008596778 | 0.9403333 | 0.076926359 |  |
|                                           |                    |                     | MR Egger                                  | 6           | 0.38423355  | 0.975621289 | 0.92845471  | 1.025183984 | 0.942064135 |             |             |           |             |  |
|                                           |                    |                     | Weighted median                           | 6           | 0.048935567 | 0.990713773 | 0.981556343 | 0.999956637 |             |             |             |           |             |  |
|                                           |                    |                     | Weighted mode                             | 6           | 0.173568213 | 0.988647944 | 0.974797939 | 1.00269473  |             |             |             |           |             |  |
|                                           |                    |                     | Contamination mixture method              | 6           | 0.058228668 | 0.987208205 | 0.982284483 | 0.992156607 |             |             |             |           |             |  |
|                                           |                    |                     | Robust adjusted profile score (RAPS)      | 6           | 0.062481149 | 0.991780812 | 0.983205976 | 1.000430431 |             |             |             |           |             |  |
|                                           |                    |                     | Debiased inverse-variance weighted method | 6           | 0.04321034  | 0.991468413 | 0.983266579 | 0.999738661 |             |             |             |           |             |  |
|                                           |                    |                     | Constrained maximum likelihood            | 6           | 0.060032881 | 0.992238042 | 0.984212276 | 1.000329254 |             |             |             |           |             |  |
| Bayesian Weighted Mendelian Randomization | 6                  | 0.04728183          | 0.991746348                               | 0.983658485 | 0.99990071  |             |             |             |             |             |             |           |             |  |
| Data1:Alexander Kurilshikov ( 2021 )      | pain all over body | Genus Desulfovibrio | Inverse variance weighted                 | 10          | 0.007007636 | 0.990925643 | 0.984381459 | 0.997513334 | 0.259825515 | 0.228982182 | 0.024534683 | 0.2926667 | 0.014860797 |  |
|                                           |                    |                     | MR Egger                                  | 10          | 0.063949596 | 0.978887778 | 0.96001468  | 0.998131906 | 0.319972357 |             |             |           |             |  |
|                                           |                    |                     | Weighted median                           | 10          | 0.518084294 | 0.997200376 | 0.988757955 | 1.005714882 |             |             |             |           |             |  |

|                    |                     |                                           |    |             |             |             |             |             |             |          |           |             |
|--------------------|---------------------|-------------------------------------------|----|-------------|-------------|-------------|-------------|-------------|-------------|----------|-----------|-------------|
|                    |                     | Weighted mode                             | 10 | 0.871703393 | 0.998864675 | 0.985569477 | 1.012339223 |             |             |          |           |             |
|                    |                     | Contamination mixture method              | 10 | 0.458119132 | 0.984551043 | 0.969892988 | 0.999430627 |             |             |          |           |             |
|                    |                     | Robust adjusted profile score (RAPS)      | 10 | 0.009518935 | 0.990624166 | 0.983595075 | 0.997703489 |             |             |          |           |             |
|                    |                     | Debiased inverse-variance weighted method | 10 | 0.004553699 | 0.990478095 | 0.983952743 | 0.997046723 |             |             |          |           |             |
|                    |                     | Constrained maximum likelihood            | 10 | 0.014943969 | 0.990999745 | 0.983810341 | 0.998241688 |             |             |          |           |             |
|                    |                     | Bayesian Weighted Mendelian Randomization | 10 | 0.005742703 | 0.990060955 | 0.983068192 | 0.997103459 |             |             |          |           |             |
| pain all over body | Genus Ruminococcus2 | Inverse variance weighted                 | 15 | 0.001458371 | 1.009788338 | 1.003749387 | 1.015863622 | 0.994893032 | 0.864546703 | 3.95E-05 | 0.9946667 | 0.002812313 |
|                    |                     | MR Egger                                  | 15 | 0.204084459 | 1.011142252 | 0.994852529 | 1.027698703 | 0.990527392 |             |          |           |             |
|                    |                     | Weighted median                           | 15 | 0.008701806 | 1.010442011 | 1.002630768 | 1.018314108 |             |             |          |           |             |
|                    |                     | Weighted mode                             | 15 | 0.04276989  | 1.014346053 | 1.001716297 | 1.027135046 |             |             |          |           |             |
|                    |                     | Contamination mixture method              | 15 | 0.001937794 | 1.010483869 | 1.00544406  | 1.015548941 |             |             |          |           |             |
|                    |                     | Robust adjusted profile score (RAPS)      | 15 | 0.003823886 | 1.009934287 | 1.003191569 | 1.016722324 |             |             |          |           |             |
|                    |                     | Debiased inverse-variance weighted method | 15 | 0.001804249 | 1.010271901 | 1.003808221 | 1.016777201 |             |             |          |           |             |
|                    |                     | Constrained maximum likelihood            | 15 | 0.00446083  | 1.009941646 | 1.003078649 | 1.0168516   |             |             |          |           |             |
|                    |                     | Bayesian Weighted Mendelian Randomization | 15 | 0.002196357 | 1.010056697 | 1.003608425 | 1.0165464   |             |             |          |           |             |



Table 3: genetic colocalisation analysis results of positive gut microbiota abundance based on  
Meta analysis on MCP and 8 pain phenotypes

| Scoure                                      | outcome               | exposure                      | nsn<br>p | PP.H4.abf       |
|---------------------------------------------|-----------------------|-------------------------------|----------|-----------------|
| Data3: Esteban A.<br>Lopera-Maya(2022)      | MCP                   | Phylum<br>Verrucomicrobia     | 258      | 0.0018262<br>13 |
|                                             |                       | Genus Adlercreutzia           | 130      | 0.0016919<br>34 |
| Data1:Alexander Kurilshikov<br>( 2021 )     | headache              | Phylum<br>Verrucomicrobia     | 178      | /               |
| Data4:Youwen Qin ( 2022 )                   | facialpain            | Genus Alistipes               | 249      | 0.0422121<br>55 |
|                                             |                       | Genus Bifidobacterium         | 188      | 0.0555433<br>83 |
| Data3: Esteban A.<br>Lopera-Maya(2022)      | neckshoulder<br>pain  | Genus Odoribacter             | 225      | 0.0520624<br>98 |
| Data2:Malte Christoph Rühlemann<br>( 2021 ) | abdominalpain         | Class<br>Gammaproteobacteria  |          |                 |
| Data3: Esteban A.<br>Lopera-Maya(2022)      | abdominalpain         | Specie<br>Eubacterium_eligens | 415      | 0.0225092<br>93 |
| Data4:Youwen Qin ( 2022 )                   | abdominalpain         | Genus Alistipes               | 249      | 0.0558042<br>56 |
| Data2:Malte Christoph Rühlemann<br>( 2021 ) | backpain              | Family Prevotellaceae         |          |                 |
| Data3: Esteban A.<br>Lopera-Maya(2022)      | backpain              | Order Bifidobacteriales       | 42       | 0.0060220<br>88 |
| Data3: Esteban A.<br>Lopera-Maya(2022)      | hippain               | Genus Subdoligranulum         | 333      | 0.0144852<br>39 |
| Data3: Esteban A.<br>Lopera-Maya(2022)      | kneepain              | Genus Dialister               | 205      | 0.0173670<br>48 |
| Data1:Alexander Kurilshikov<br>( 2021 )     | pain all over<br>body | Genus Desulfovibrio           | 210      | 0.0128547<br>44 |
|                                             |                       | Genus Ruminococcus2           | 242      | 0.0188889<br>71 |

MCP : multisite chronic pain

1064  
1065  
1066  
1067

1068

1069

1070

1071

1072

1073

Table 4 Three causal effects (a, b, c') of the mediation analysis in IVW method

| Causal                        | effects: | nSNP | Value*                 | P           |
|-------------------------------|----------|------|------------------------|-------------|
| Exposure-mediating            |          |      |                        |             |
| variable-outcome              |          |      |                        |             |
| Genus Odoribacter- mean OD in |          | 11   | a=0.111738712832827    | 0.00014925  |
| Fornix cres+Stria terminalis  |          | 9    | b=-0.025127303642184   | 0.006414495 |
| (left)- neck/shoulder pain    |          | 11   | c'=-0.0200731182675427 | 0.000120392 |

1074

1075

1076

nSNP: number of SNP; \*a: exposure to mediating variable causal effects; b: mediating variable to outcome causal effects; c': exposure to outcome variable causal effects exposure-mediating variable-outcome; IVW: inverse variance weighted.



It is made available under a [CC-BY 4.0 International license](https://creativecommons.org/licenses/by/4.0/).

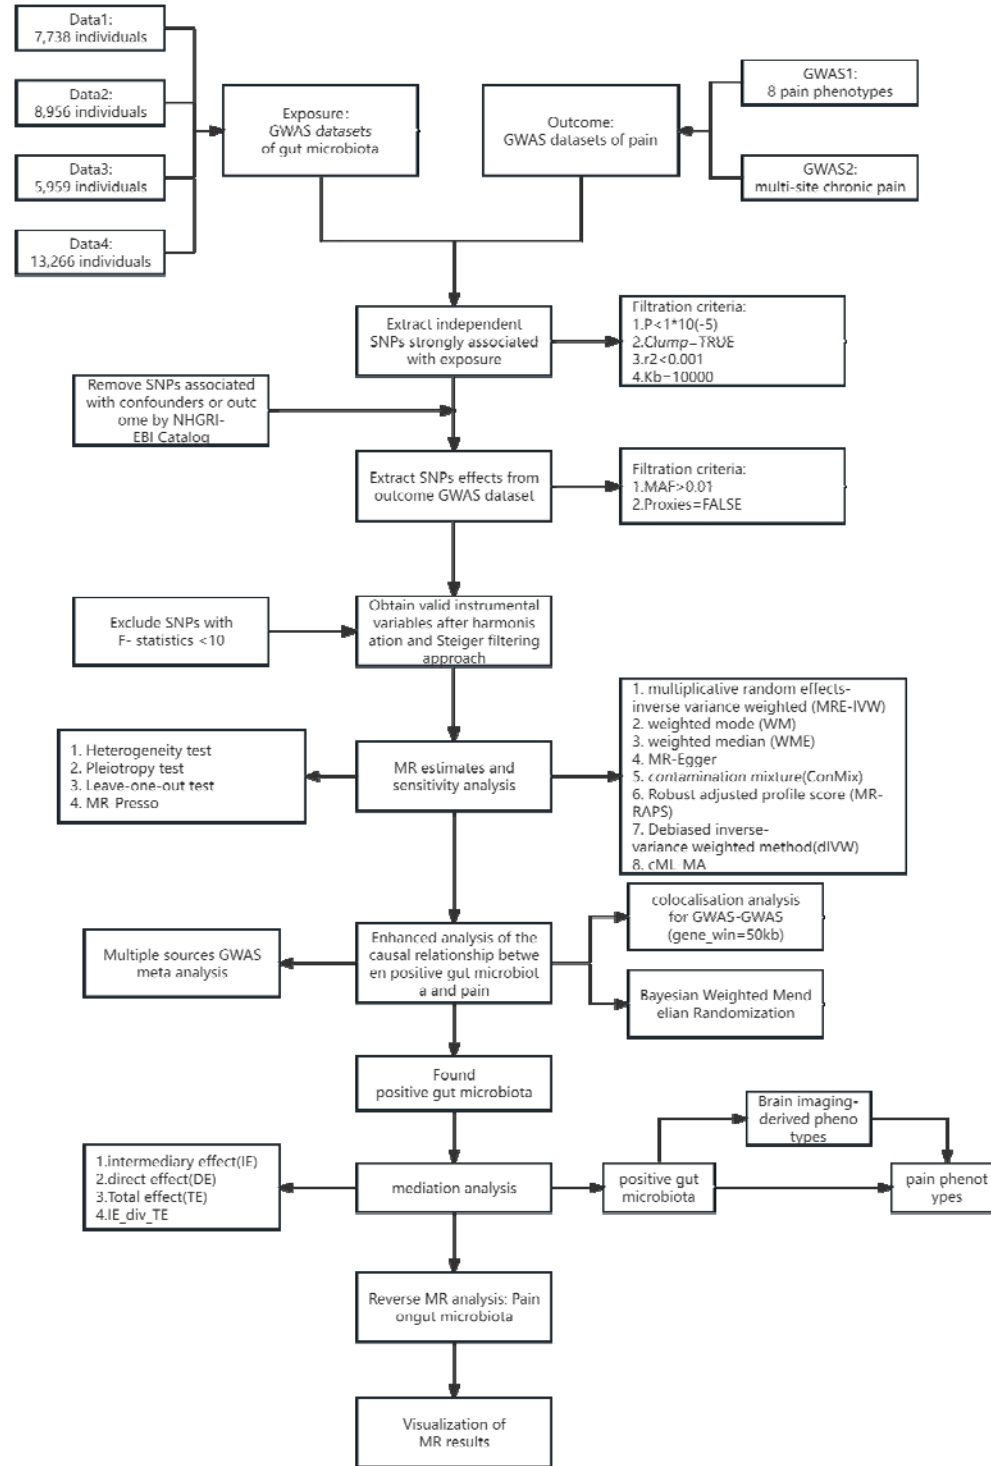

Figure 1: Flow chart of study



It is made available under a [CC-BY 4.0 International license](https://creativecommons.org/licenses/by/4.0/).

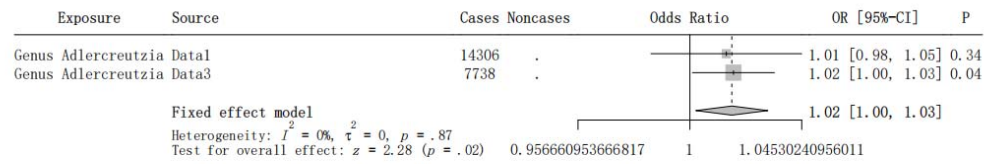

Figure 2a The Forest plots of Meta analysis of Genus Adlercreutzia on MCP

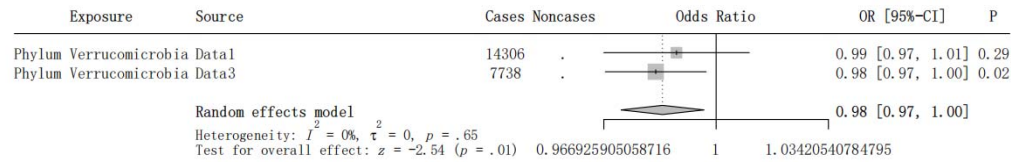

Figure 2b The Forest plots of Meta analysis of Phylum Verrucomicrobia on MCP

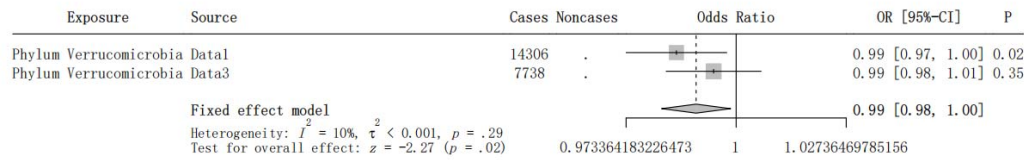

Figure 2c The Forest plots of Meta analysis of Phylum Verrucomicrobia on Headache

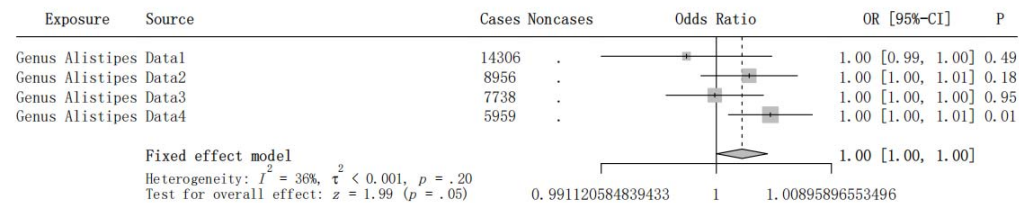

Figure 2d The Forest plots of Meta analysis of Genus Alistipes on Facialpain

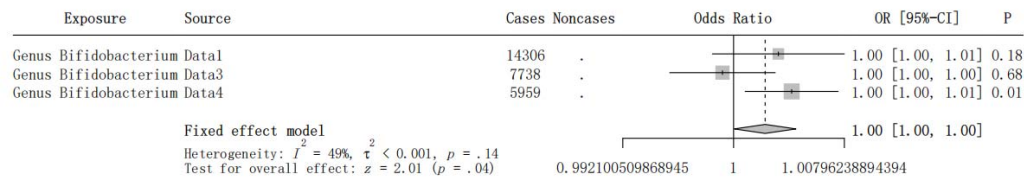

Figure 2e The Forest plots of Meta analysis of Genus Bifidobacterium on Facialpain

It is made available under a [CC-BY 4.0 International license](https://creativecommons.org/licenses/by/4.0/).

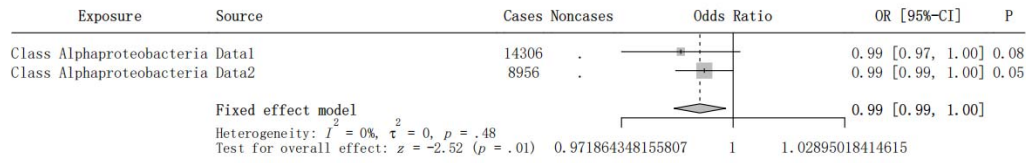

Figure 2f The Forest plots of Meta analysis of Class Alphaproteobacteria on Neckshoulderpain

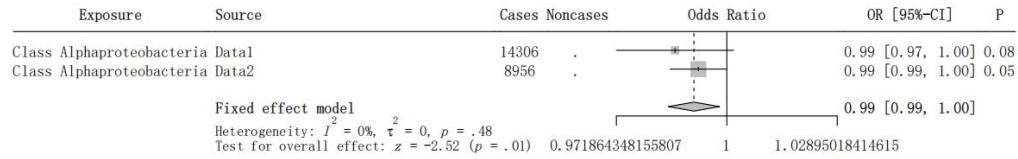

Figure 2g The Forest plots of Meta analysis of Genus Odoribacter on Neckshoulderpain

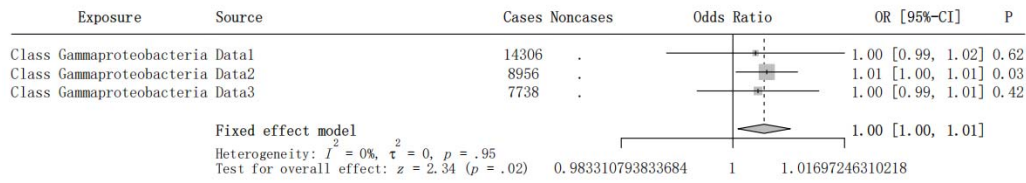

Figure 2h The Forest plots of Meta analysis of Class Gammaproteobacteria on Abdominalpain

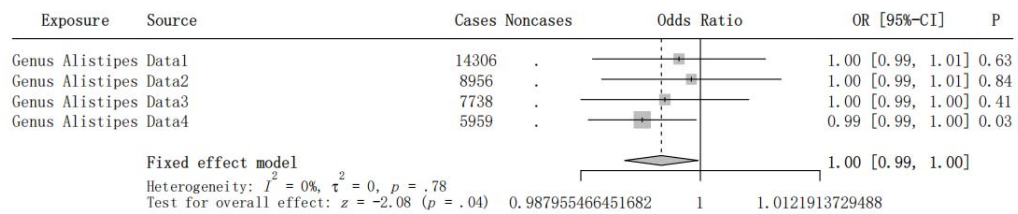

Figure 2i The Forest plots of Meta analysis of Genus Alistipes on Abdominalpain

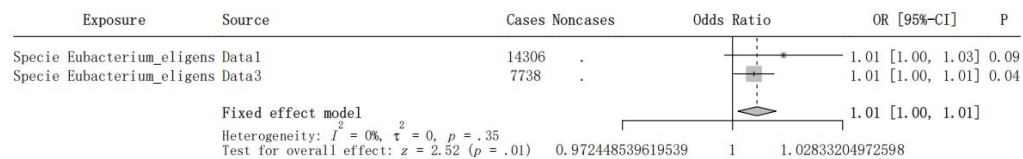

Figure 2j The Forest plots of Meta analysis of Specie Eubacterium\_eligens on Abdominalpain

It is made available under a [CC-BY 4.0 International license](https://creativecommons.org/licenses/by/4.0/).

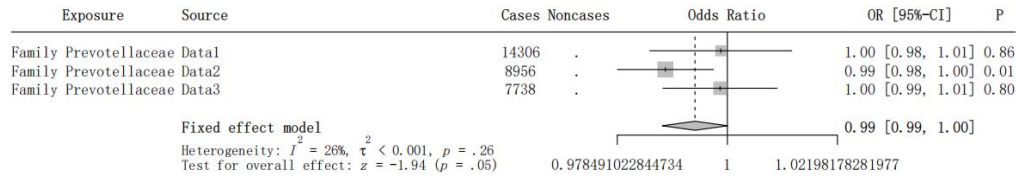

Figure 2k The Forest plots of Meta analysis of Family Prevotellaceae on Backpain

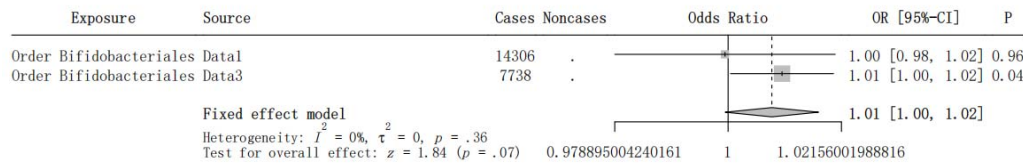

Figure 2l The Forest plots of Meta analysis of Order Bifidobacteriales on Backpain

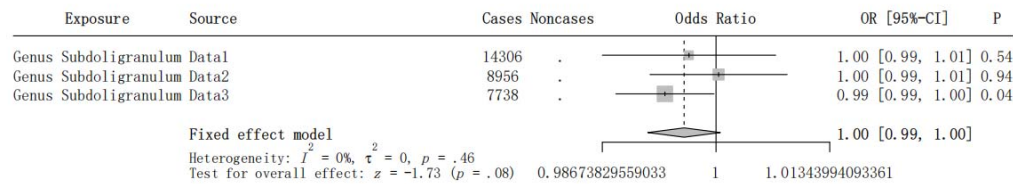

Figure 2m The Forest plots of Meta analysis of Genus Subdoligranulum on Hippain

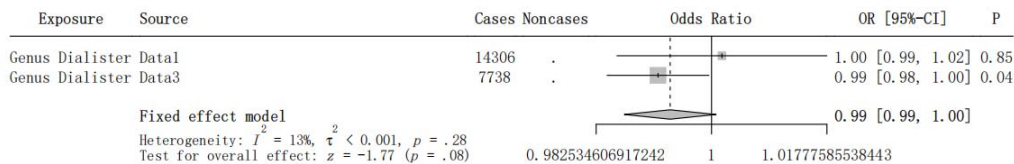

Figure 2n The Forest plots of Meta analysis of Genus Dialister on Kneepain

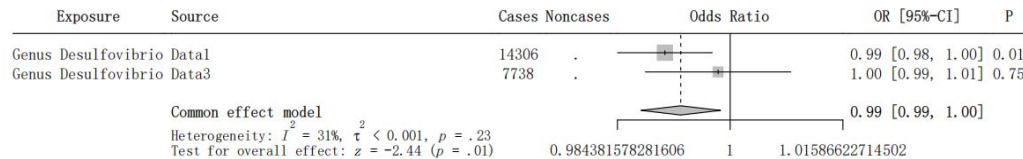

Figure 2o The Forest plots of Meta analysis of Genus Desulfovibrio on pain all over body

It is made available under a [CC-BY 4.0 International license](https://creativecommons.org/licenses/by/4.0/) .

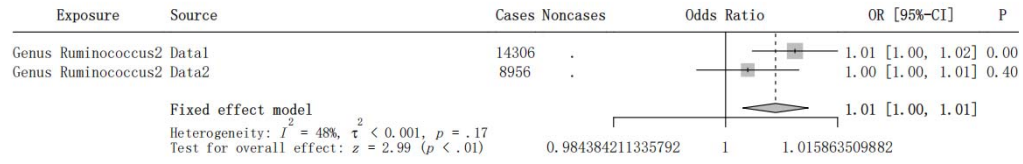

Figure 2p The Forest plots of Meta analysis of Genus Ruminococcus2 on pain all over body

It is made available under a [CC-BY 4.0 International license](https://creativecommons.org/licenses/by/4.0/).

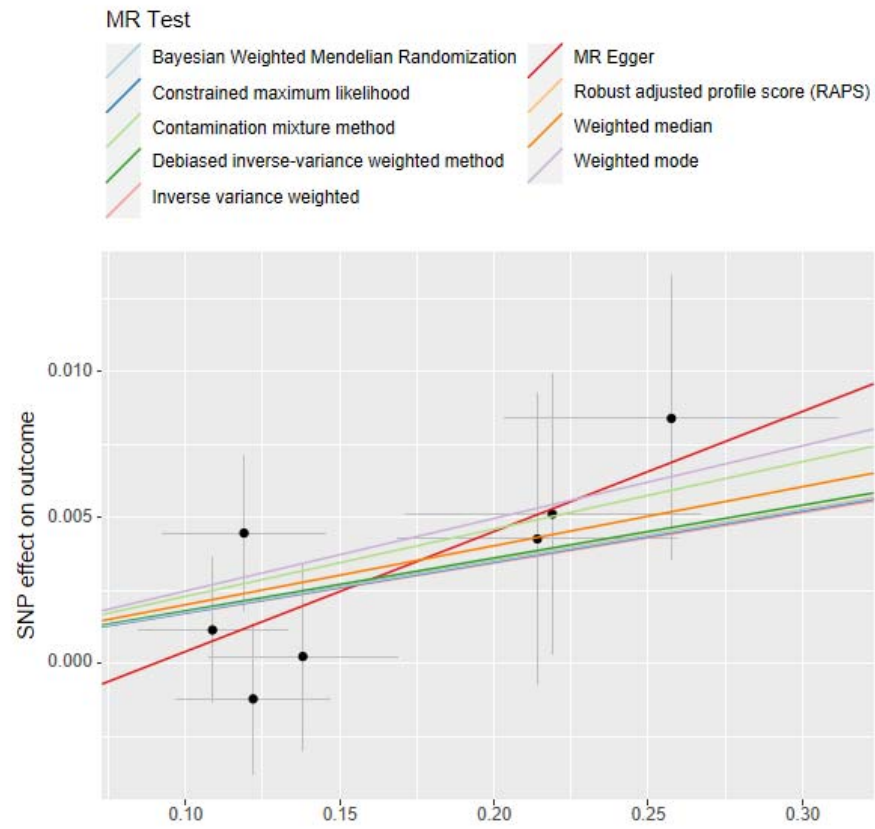

Figure 3a The scatter plots of MR: Genus Adlercreutzia on MCP

It is made available under a [CC-BY 4.0 International license](https://creativecommons.org/licenses/by/4.0/) .

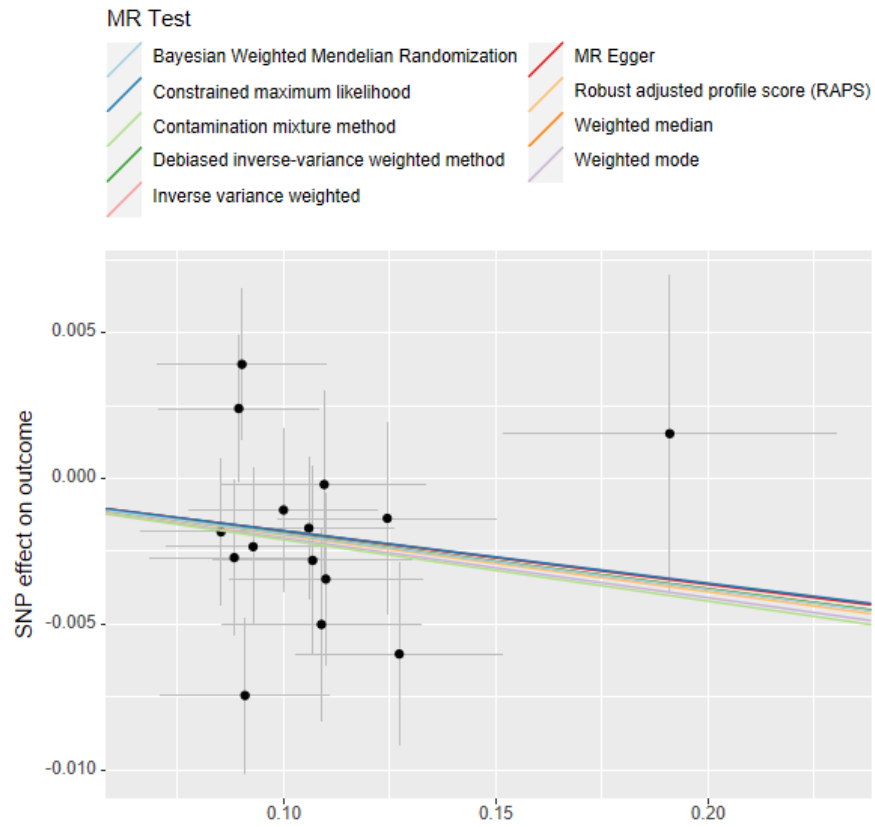

Figure 3b The scatter plots of MR: Phylum Verrucomicrobia on MCP

It is made available under a [CC-BY 4.0 International license](https://creativecommons.org/licenses/by/4.0/) .

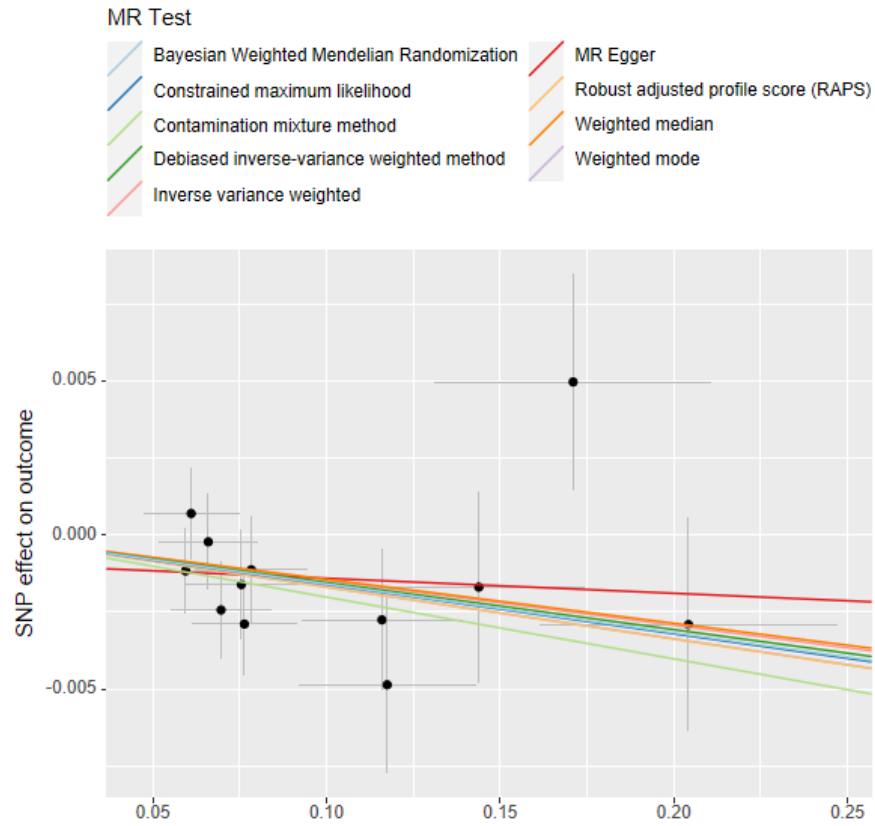

Figure 3c The scatter plots of MR: Phylum Verrucomicrobia on Headache

It is made available under a [CC-BY 4.0 International license](https://creativecommons.org/licenses/by/4.0/).

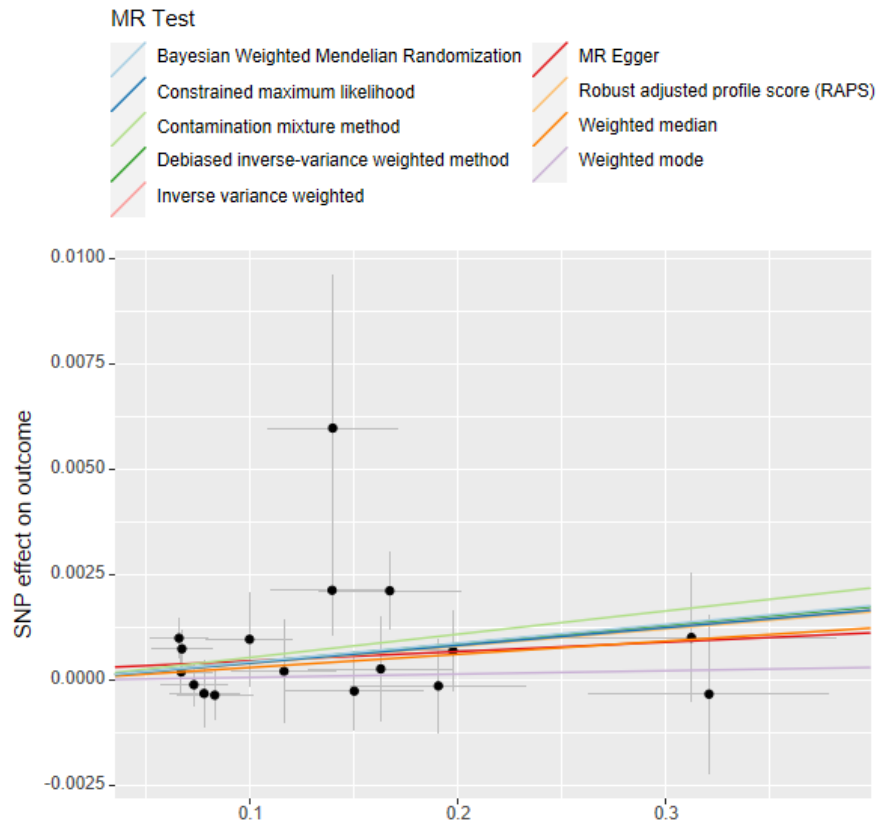

Figure 3d The scatter plots of MR: Genus Alistipes on Facialpain



It is made available under a [CC-BY 4.0 International license](https://creativecommons.org/licenses/by/4.0/).

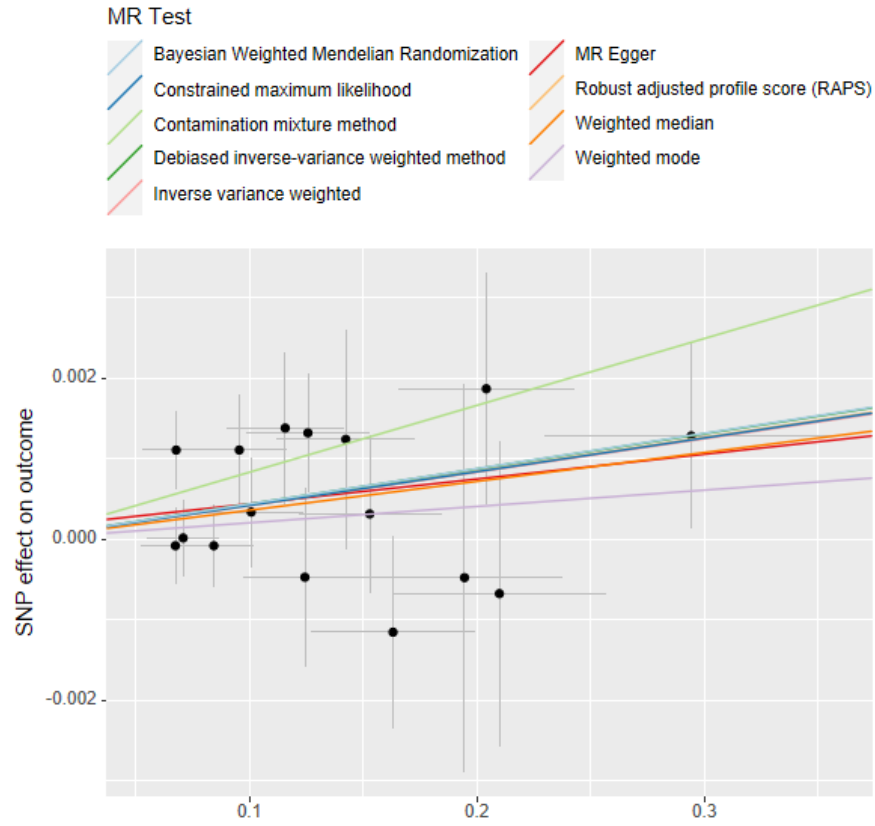

Figure 3e The scatter plots of MR: Genus Bifidobacterium on Facialpain

It is made available under a [CC-BY 4.0 International license](https://creativecommons.org/licenses/by/4.0/) .

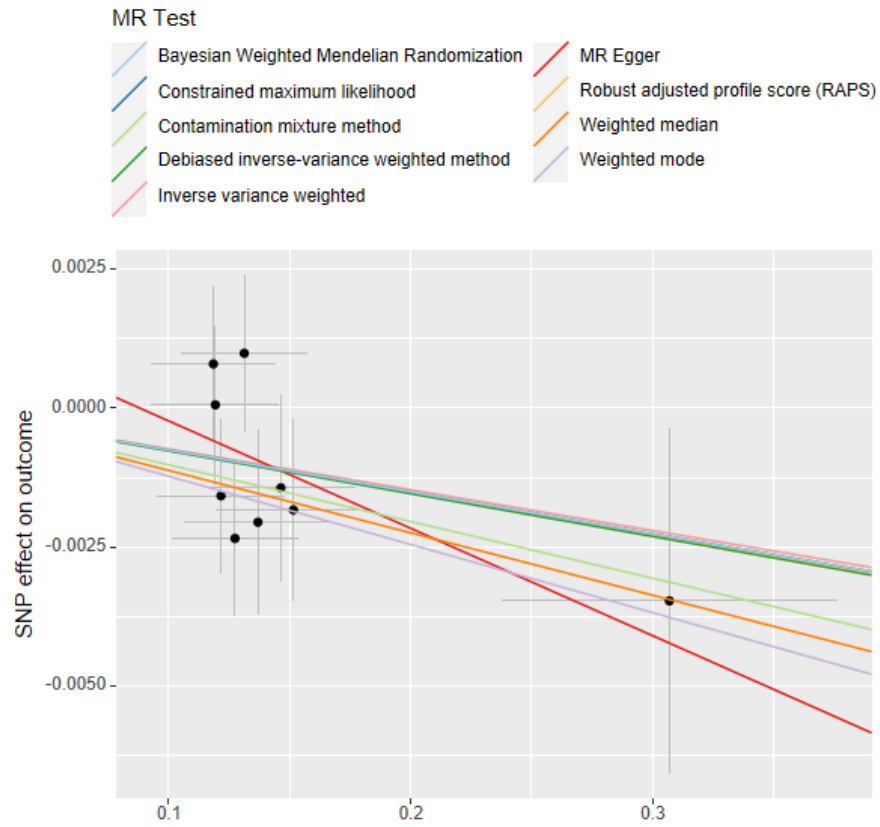

Figure 3f The scatter plots of MR: Class Alphaproteobacteria on Neckshoulderpain

It is made available under a [CC-BY 4.0 International license](https://creativecommons.org/licenses/by/4.0/).

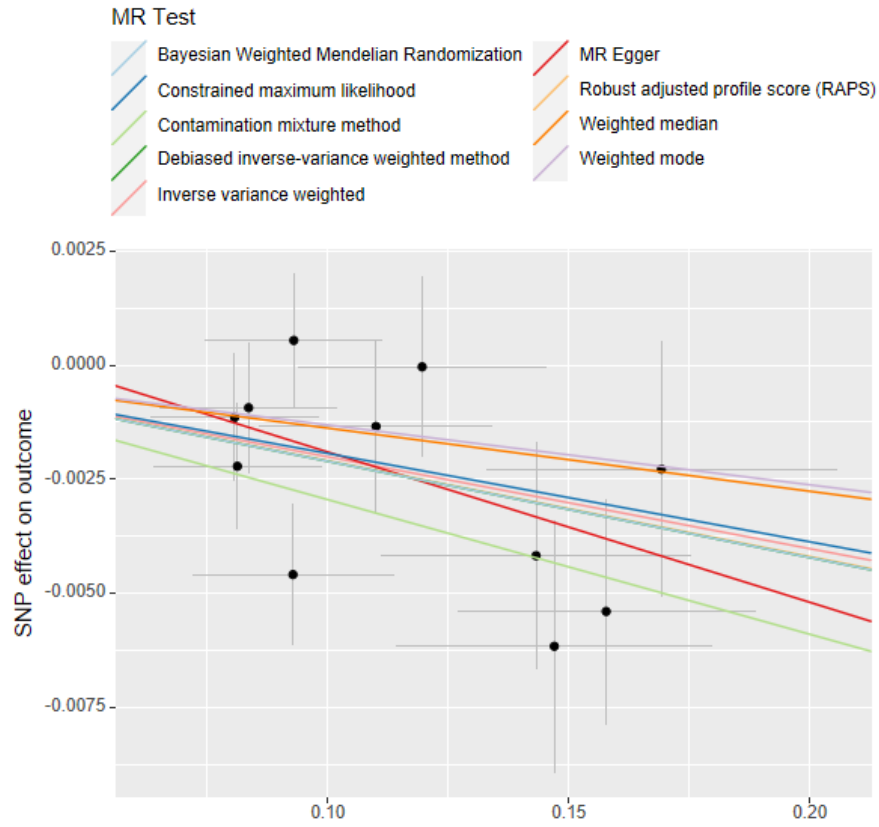

Figure 3g The scatter plots of MR: Genus Odoribacter on Neckshoulderpain

It is made available under a [CC-BY 4.0 International license](https://creativecommons.org/licenses/by/4.0/) .

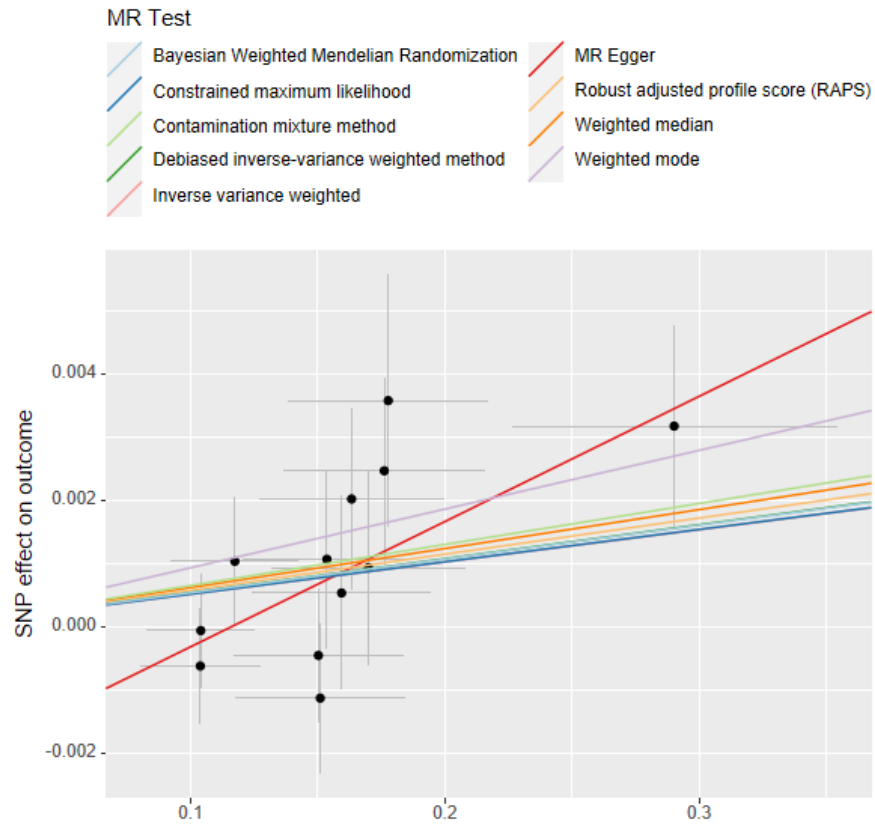

Figure 3h The scatter plots of MR: Class Gammaproteobacteria on Abdominalpain

It is made available under a [CC-BY 4.0 International license](https://creativecommons.org/licenses/by/4.0/).

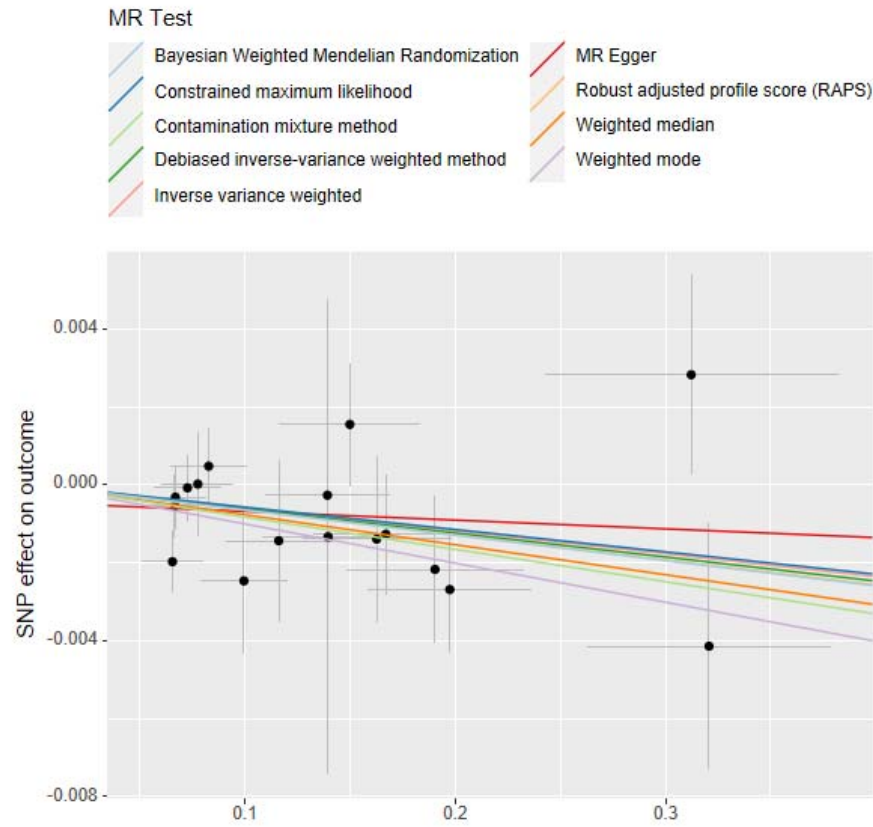

Figure 3i The scatter plots of MR: Genus Alistipes on Abdominalpain

It is made available under a [CC-BY 4.0 International license](https://creativecommons.org/licenses/by/4.0/).

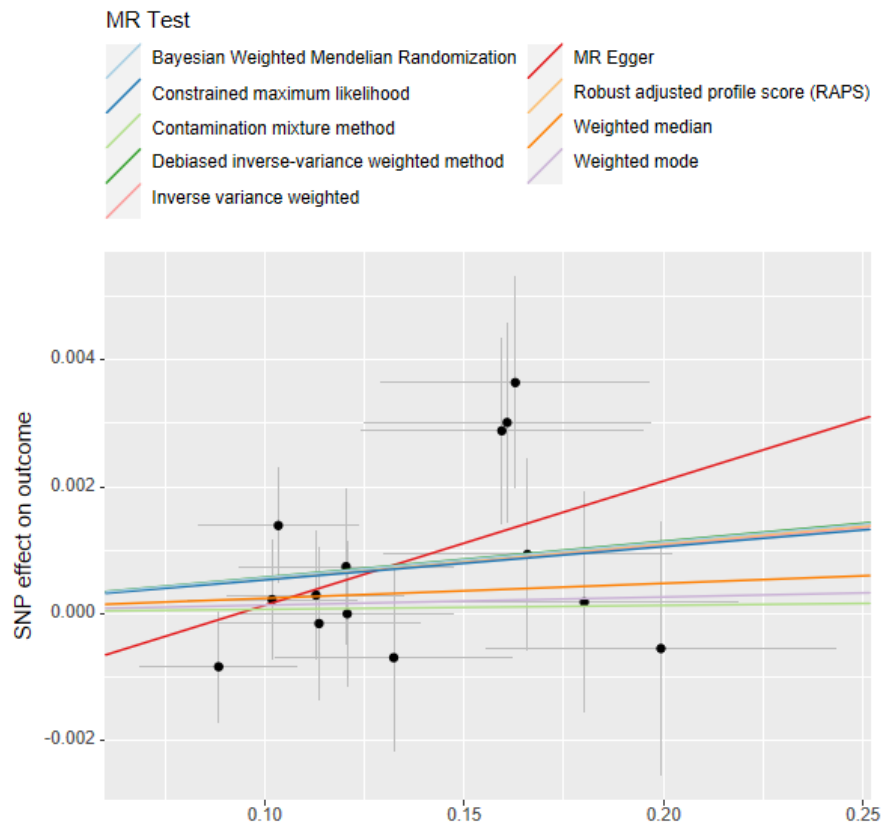

Figure 3j The scatter plots of MR: Specie Eubacterium\_eligens on Abdominalpain

It is made available under a [CC-BY 4.0 International license](https://creativecommons.org/licenses/by/4.0/).

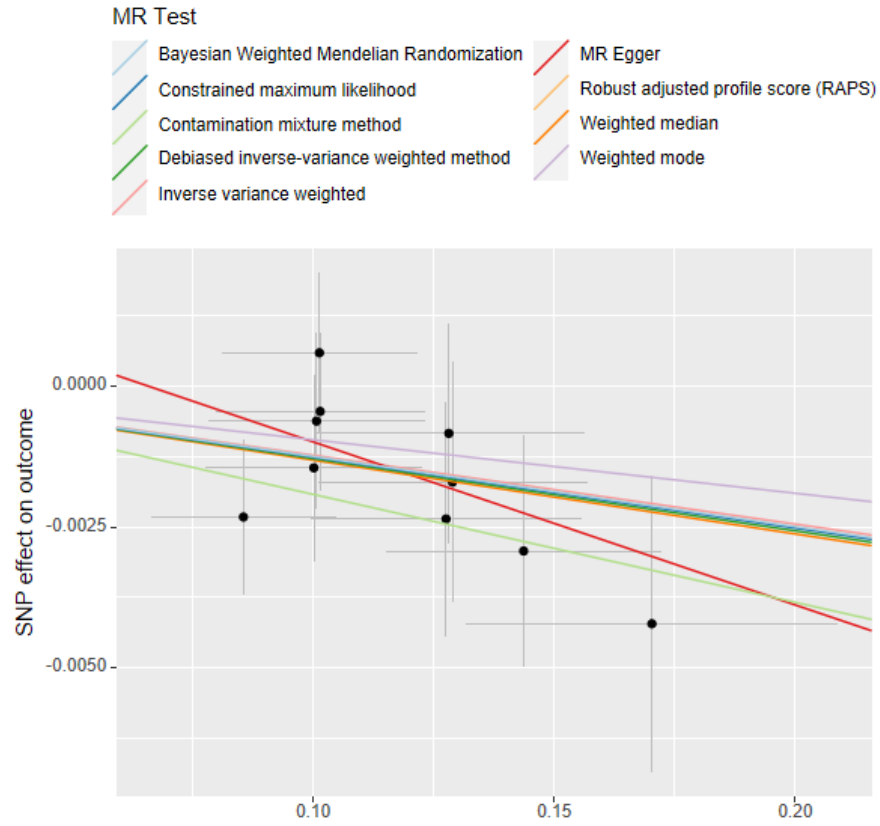

Figure 3k The scatter plots of MR: Family Prevotellaceae on Backpain

It is made available under a [CC-BY 4.0 International license](https://creativecommons.org/licenses/by/4.0/).

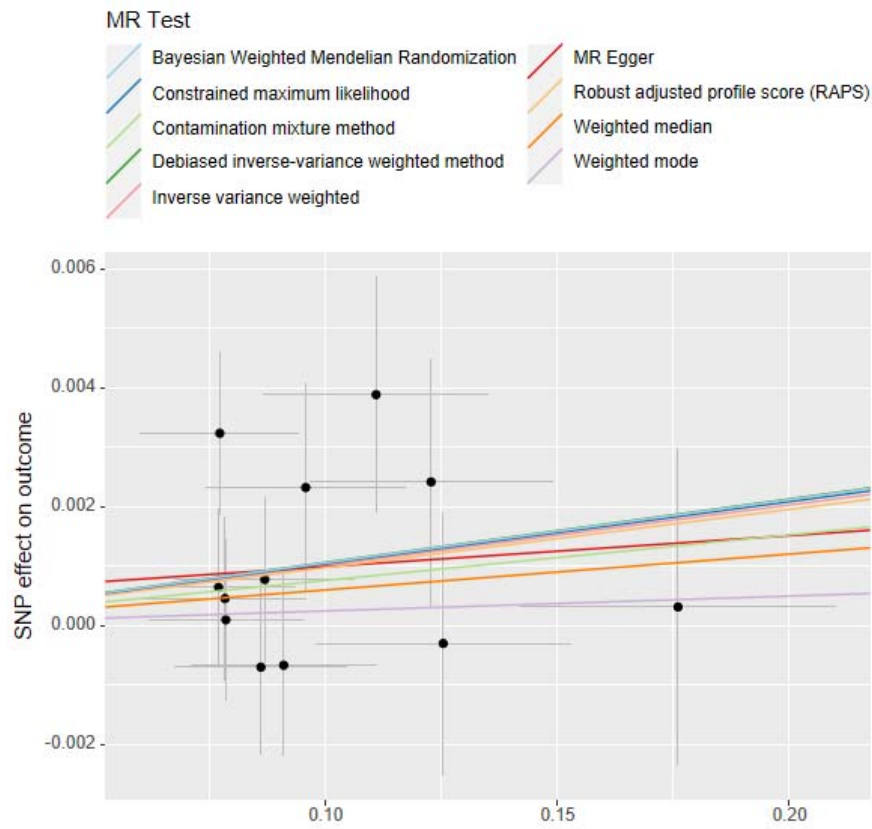

Figure 3| The scatter plots of MR: Order Bifidobacteriales on Backpain



It is made available under a [CC-BY 4.0 International license](https://creativecommons.org/licenses/by/4.0/).

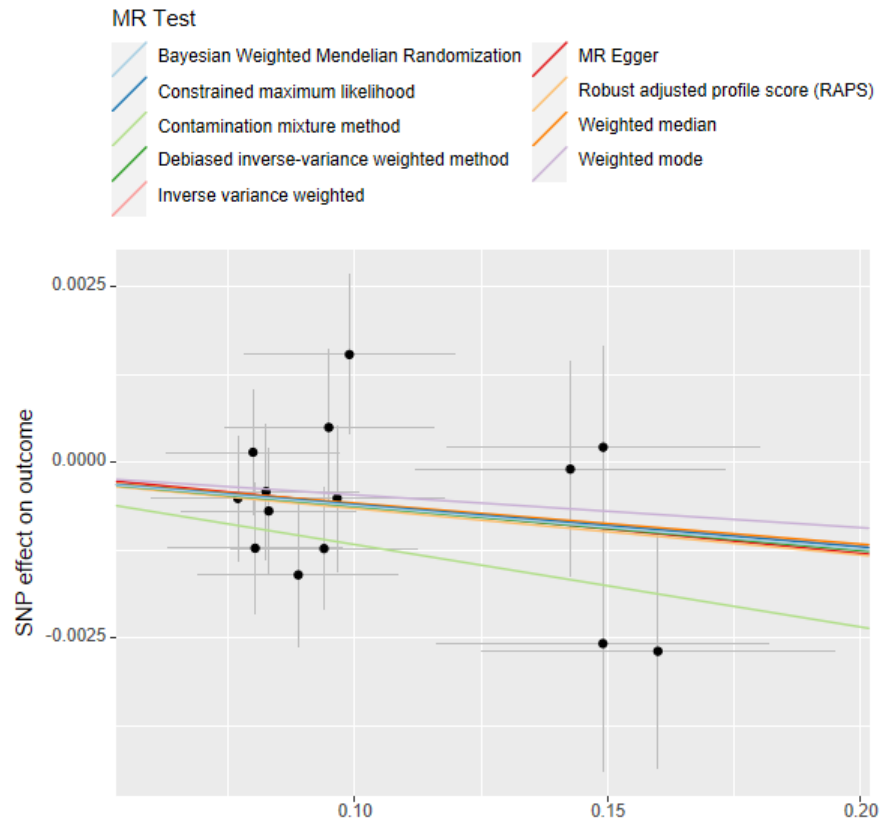

Figure 3m The scatter plots of MR: Genus Subdoligranulum on Hippain

It is made available under a [CC-BY 4.0 International license](https://creativecommons.org/licenses/by/4.0/).

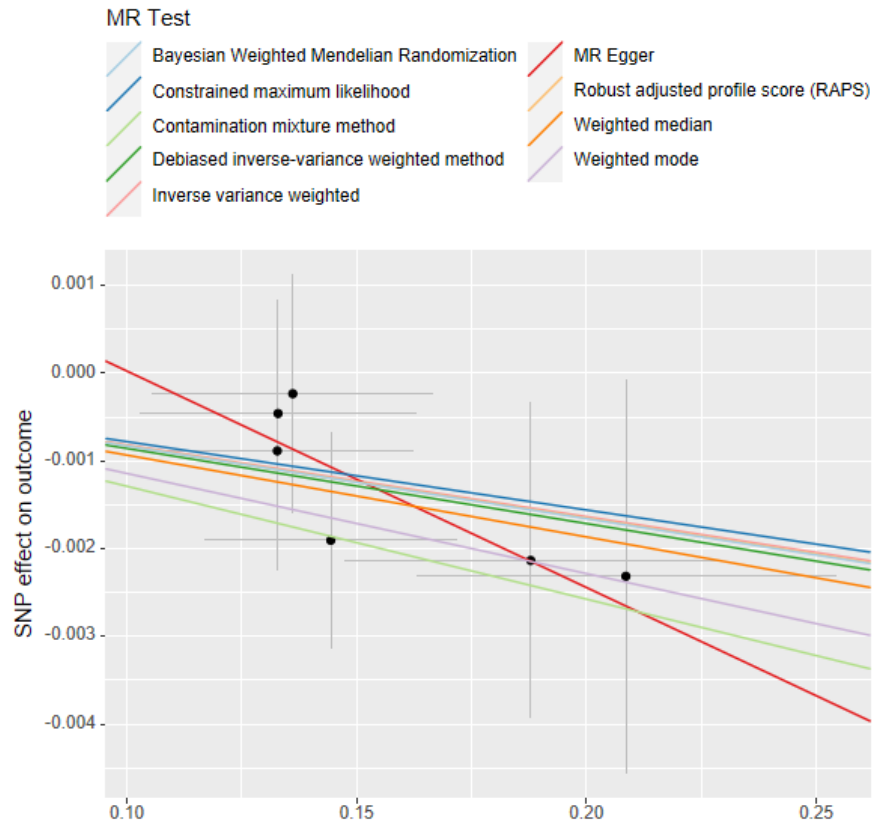

Figure 3n The scatter plots of MR: Genus Dialister on Kneepain

It is made available under a [CC-BY 4.0 International license](https://creativecommons.org/licenses/by/4.0/) .

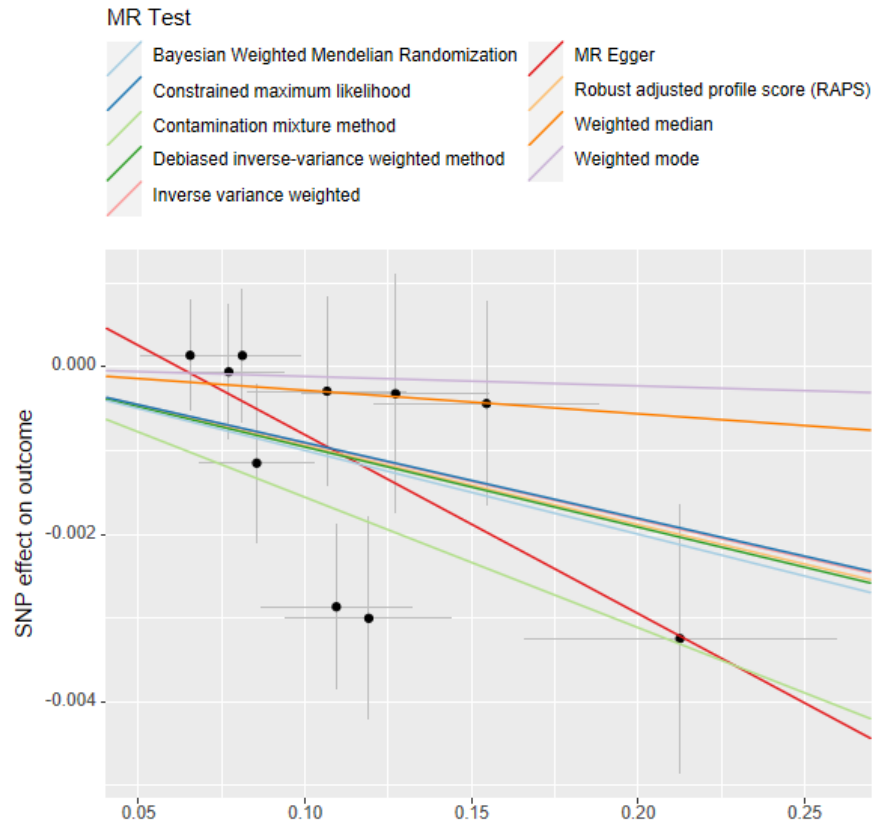

Figure 3o The scatter plots of MR: Genus Desulfovibrio on pain all over body

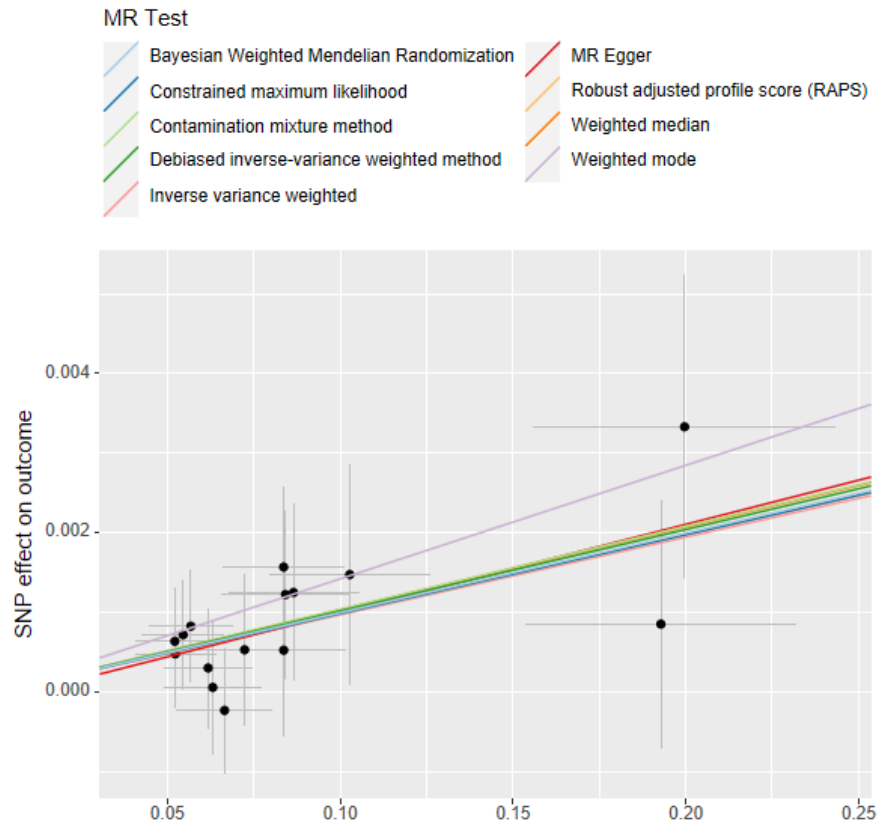

Figure 3p The scatter plots of MR: Genus Ruminococcus2 on pain all over body

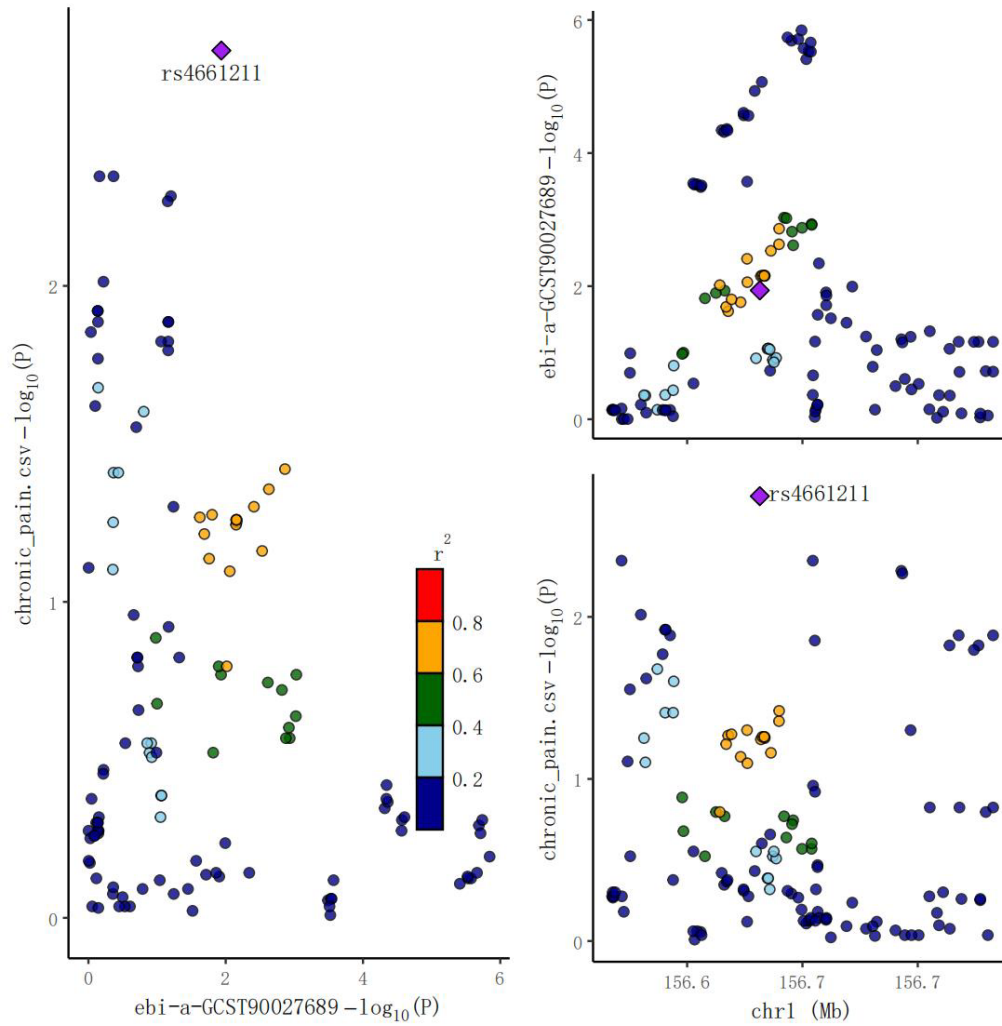

Figure 4a The locuscomparer plot of coloc analysis: Genus Adlercreutzia on MCP

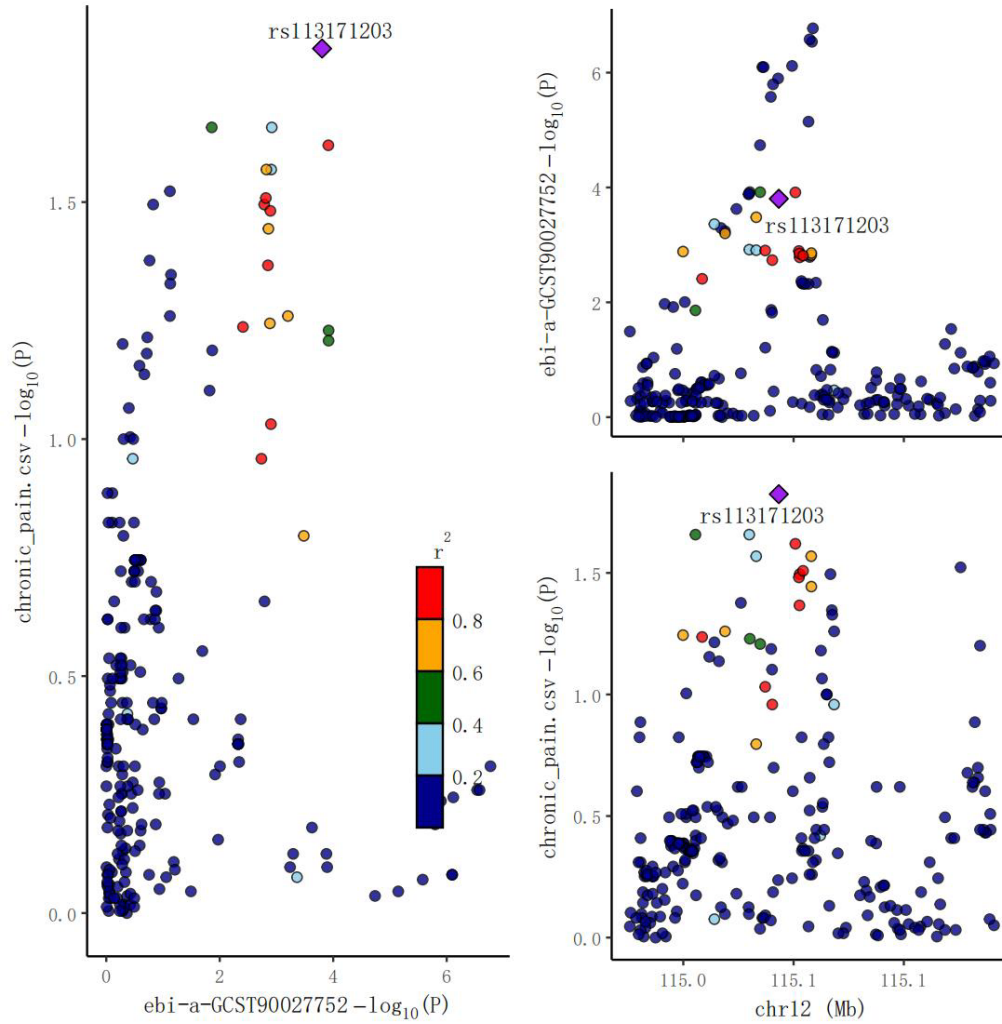

Figure 4b The locuscomparer plot of coloc analysis: Phylum Verrucomicrobia on MCP

It is made available under a [CC-BY 4.0 International license](https://creativecommons.org/licenses/by/4.0/).

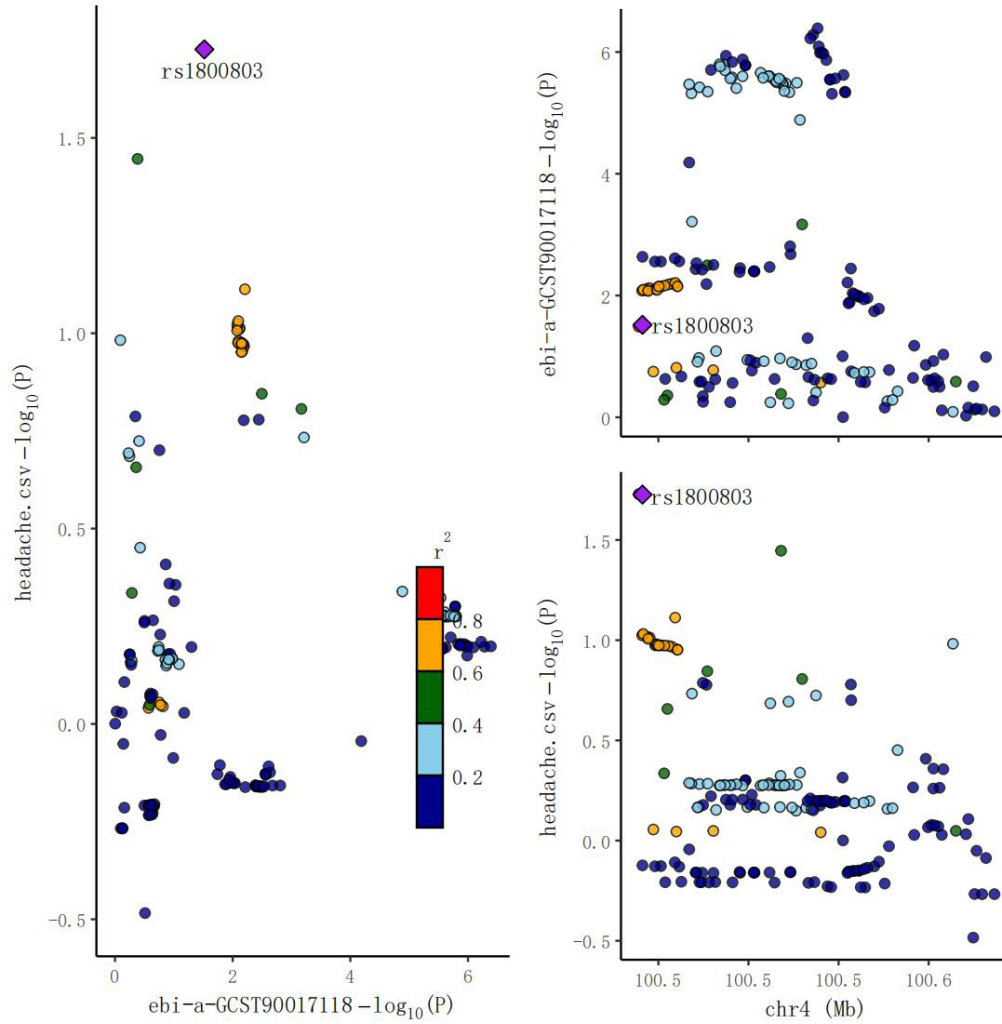

Figure 4c The locuscomparer plot of coloc analysis: Phylum Verrucomicrobia on Headache

It is made available under a [CC-BY 4.0 International license](https://creativecommons.org/licenses/by/4.0/).

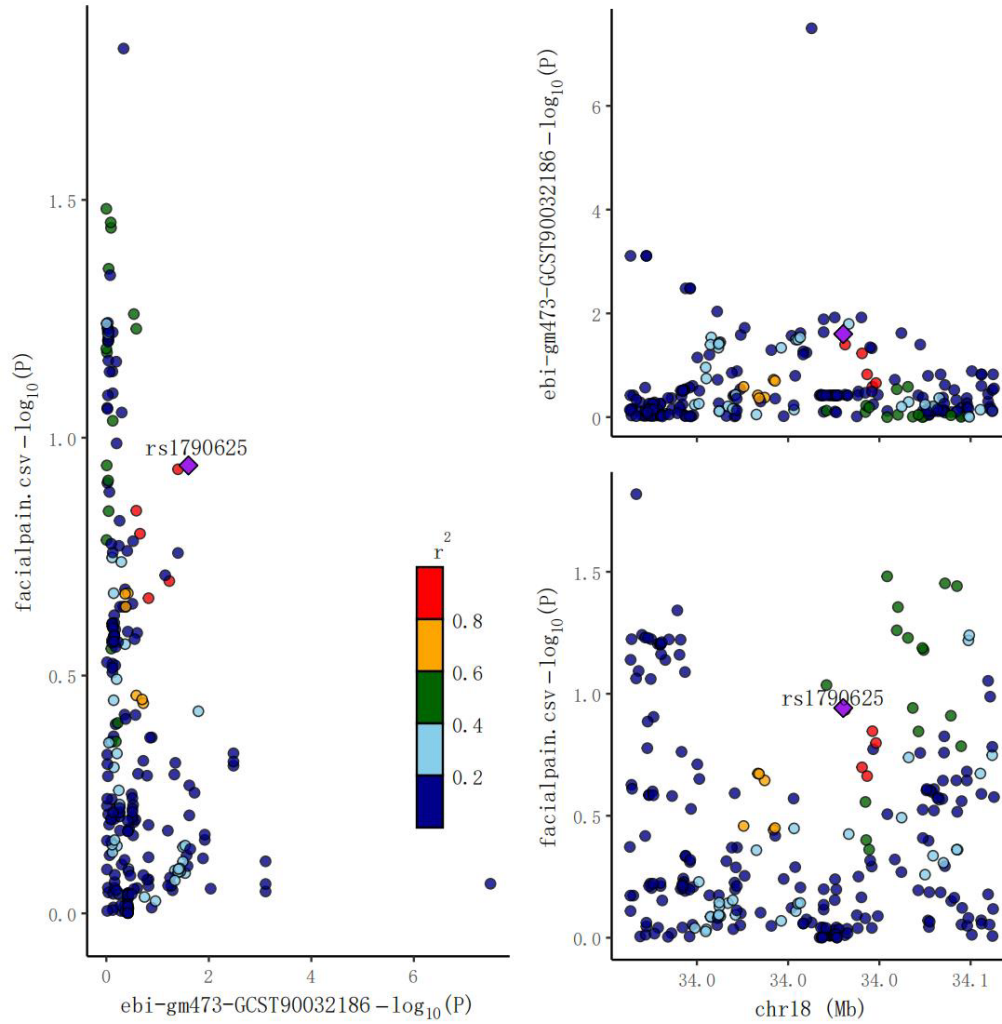

Figure 4d The locuscomparer plot of coloc analysis: Genus Alistipes on Facialpain



It is made available under a [CC-BY 4.0 International license](https://creativecommons.org/licenses/by/4.0/).

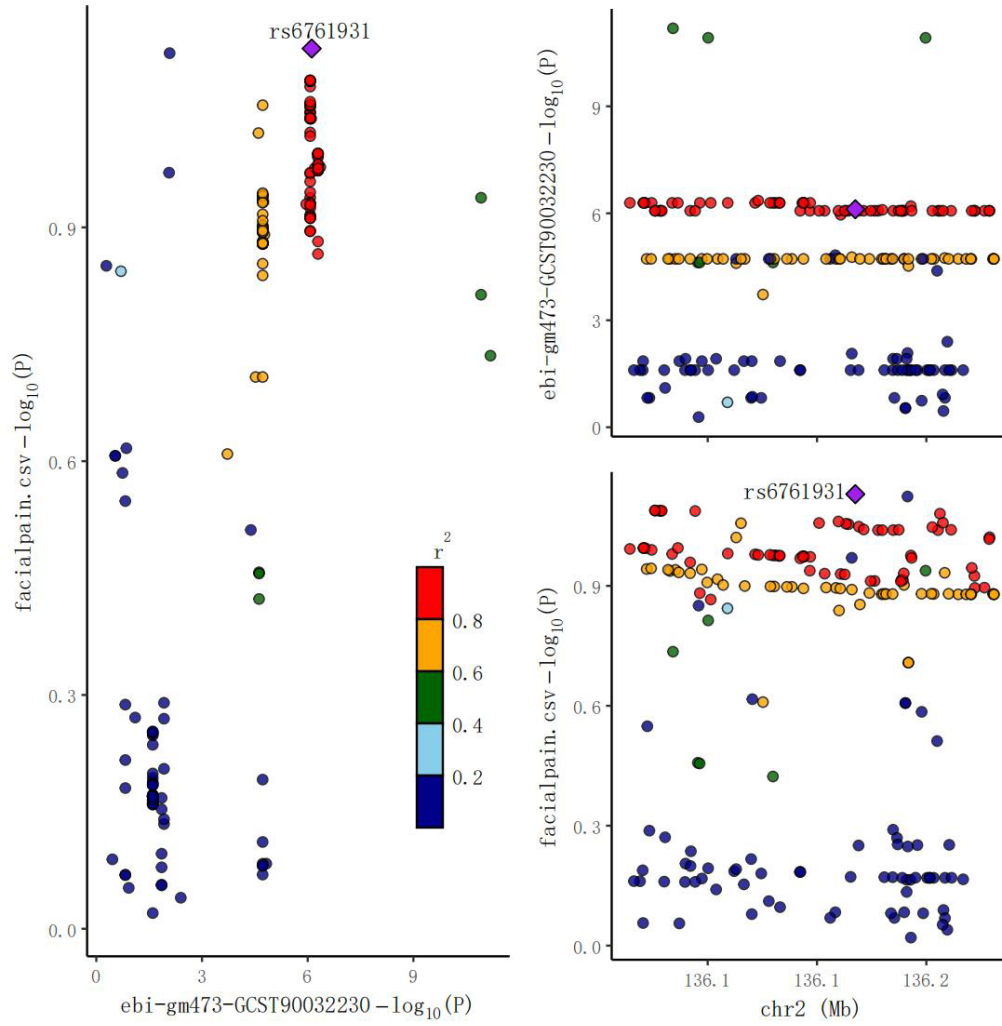

Figure 4e The locuscomparer plot of coloc analysis: Genus Bifidobacterium on Facialpain

It is made available under a [CC-BY 4.0 International license](https://creativecommons.org/licenses/by/4.0/).

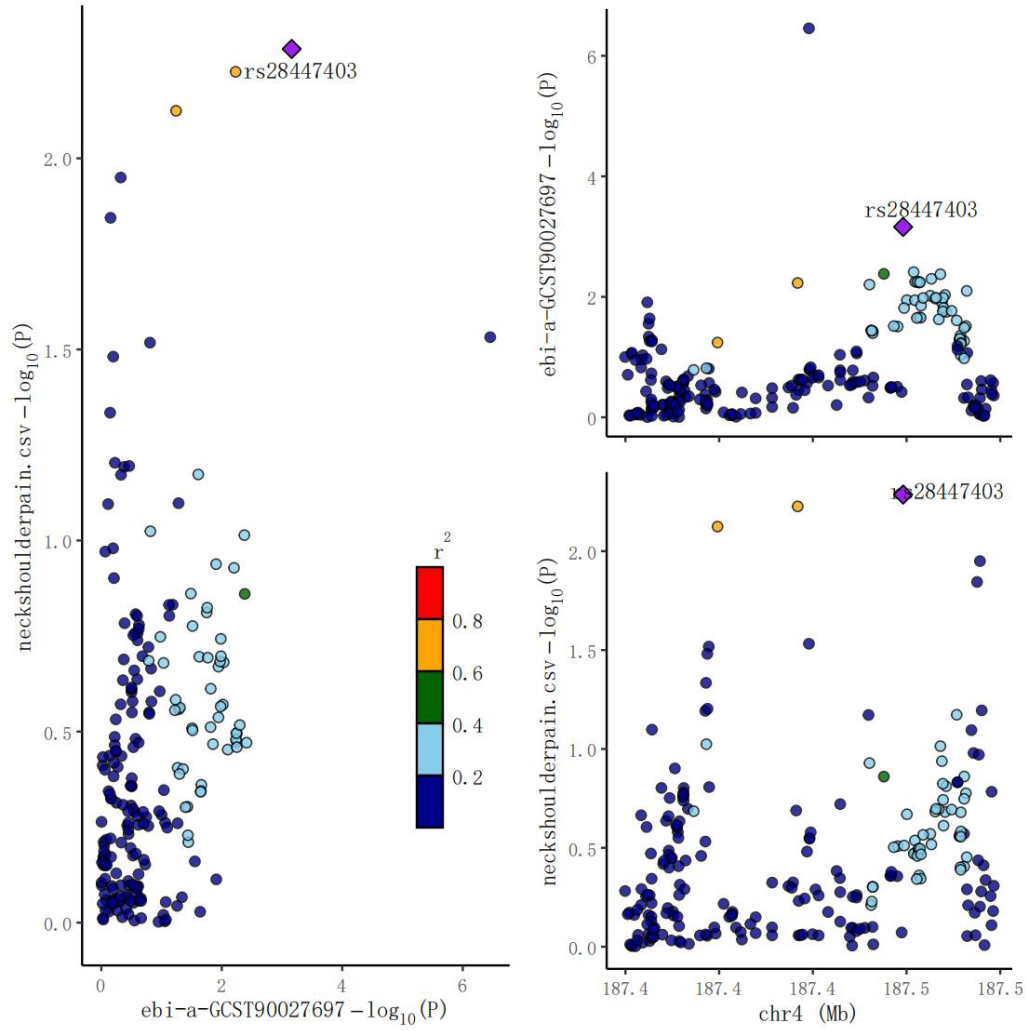

Figure 4f The locuscomparer plot of coloc analysis: Genus *Odoribacter* on Neckshoulderpain

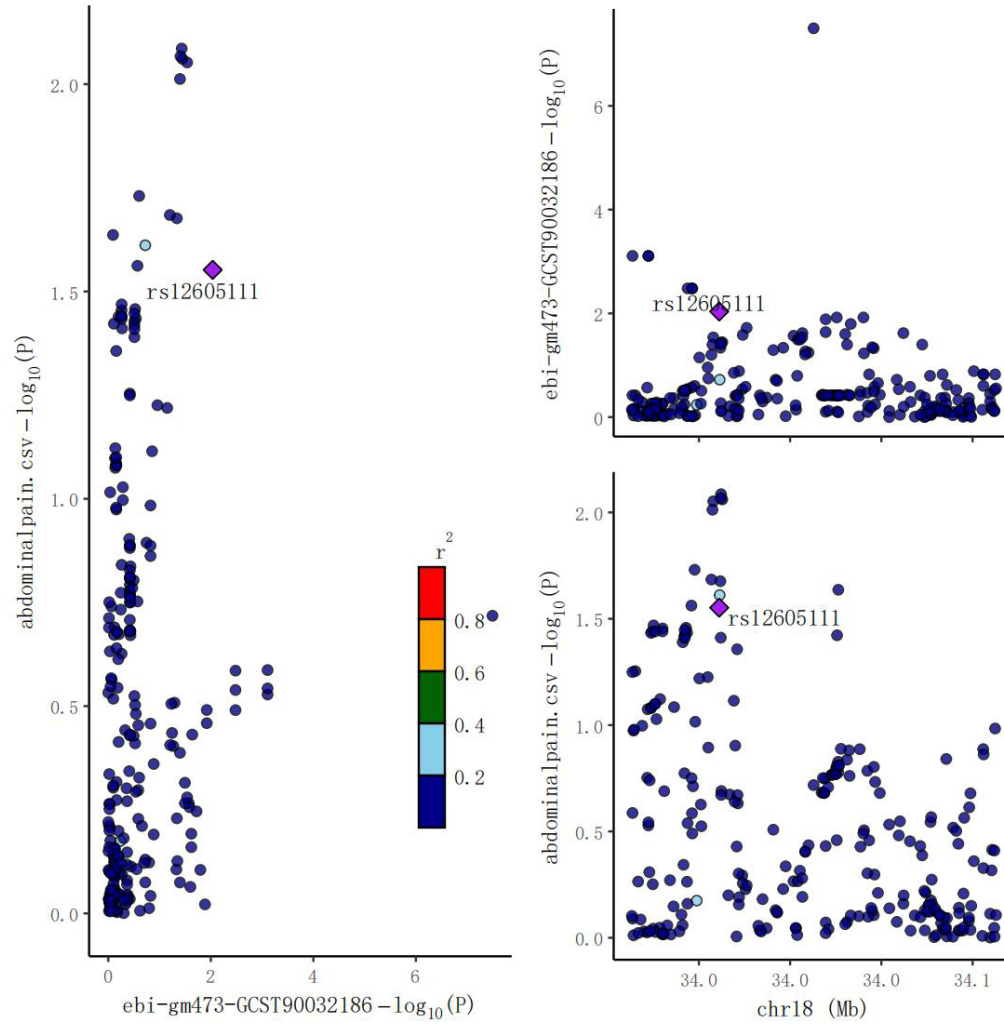

Figure 4g The locus comparison plot of colocalization analysis: Genus *Alistipes* on Abdominalpain

It is made available under a [CC-BY 4.0 International license](https://creativecommons.org/licenses/by/4.0/).

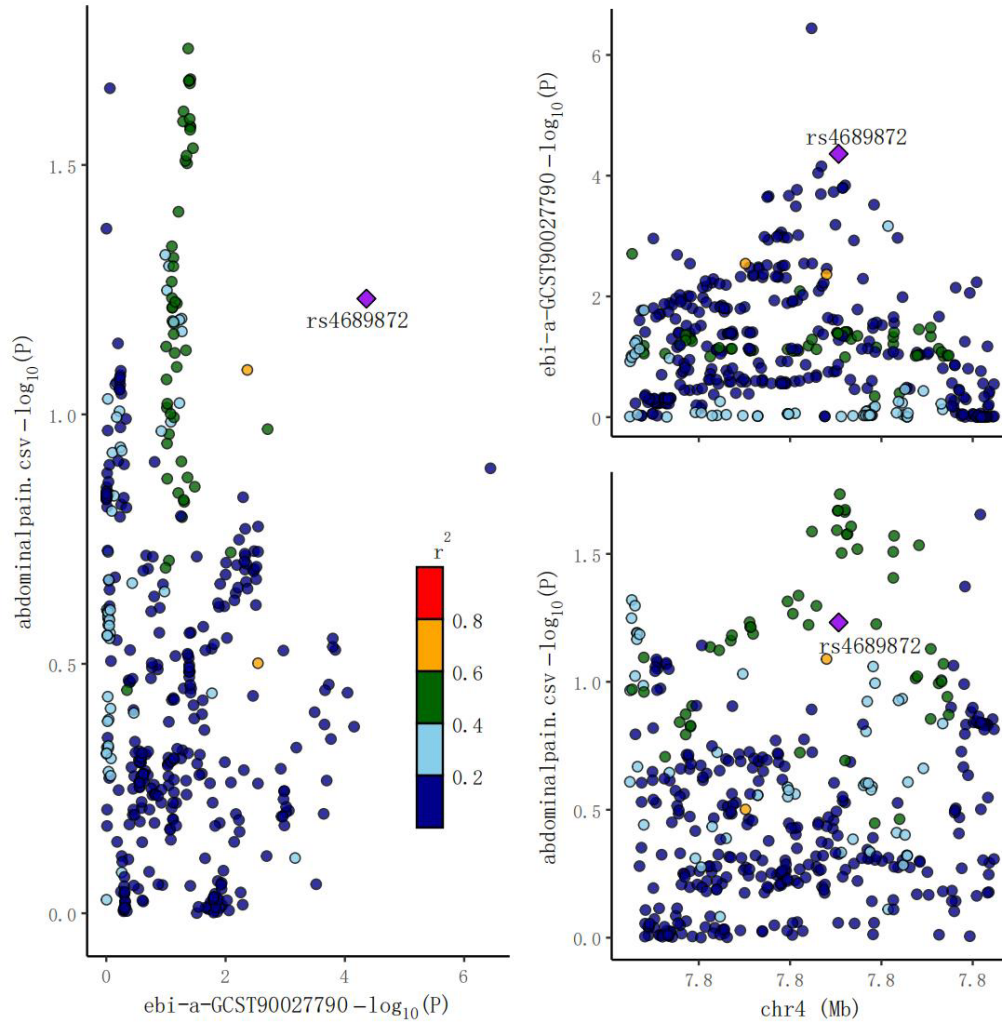

Figure 4h The locuscomparer plot of coloc analysis: Specie *Eubacterium\_eligens* on Abdominalpain

It is made available under a [CC-BY 4.0 International license](https://creativecommons.org/licenses/by/4.0/).

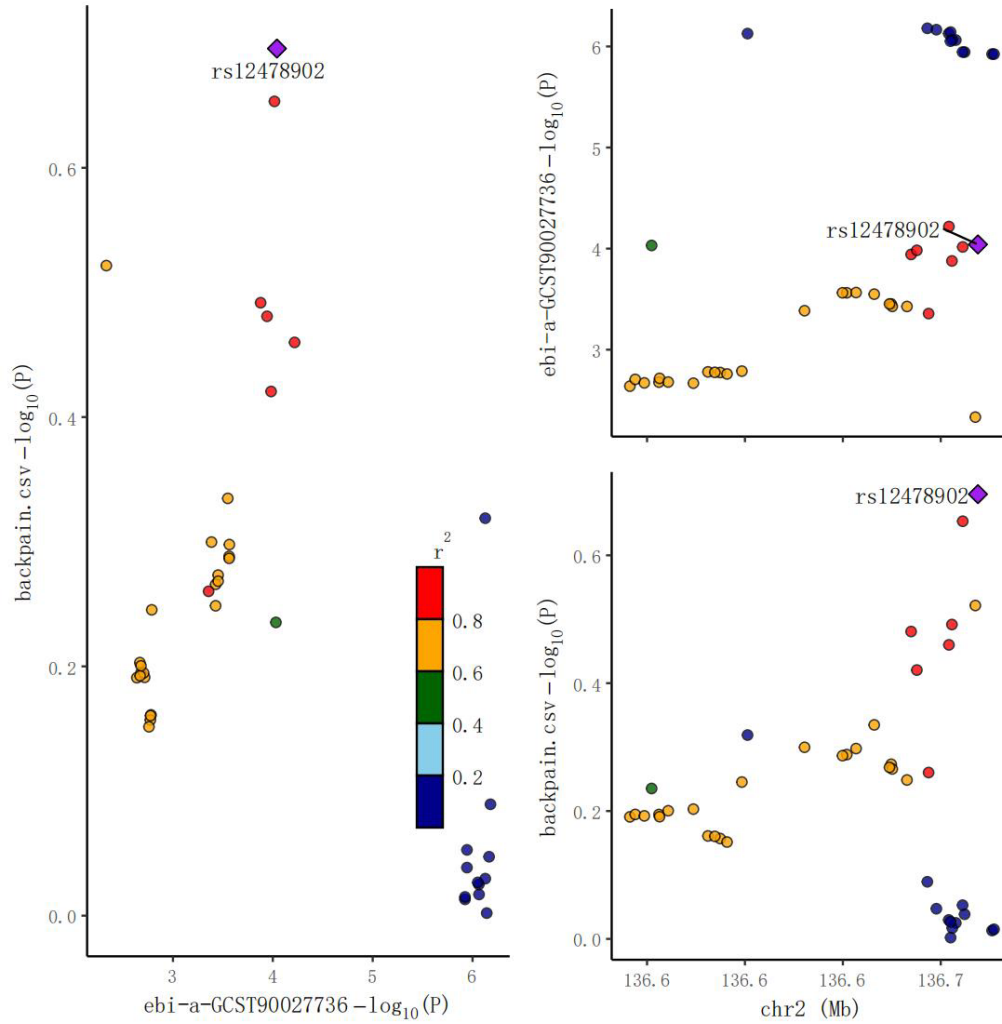

Figure 4i The locuscomparer plot of coloc analysis: Order Bifidobacteriales on Backpain

It is made available under a [CC-BY 4.0 International license](https://creativecommons.org/licenses/by/4.0/).

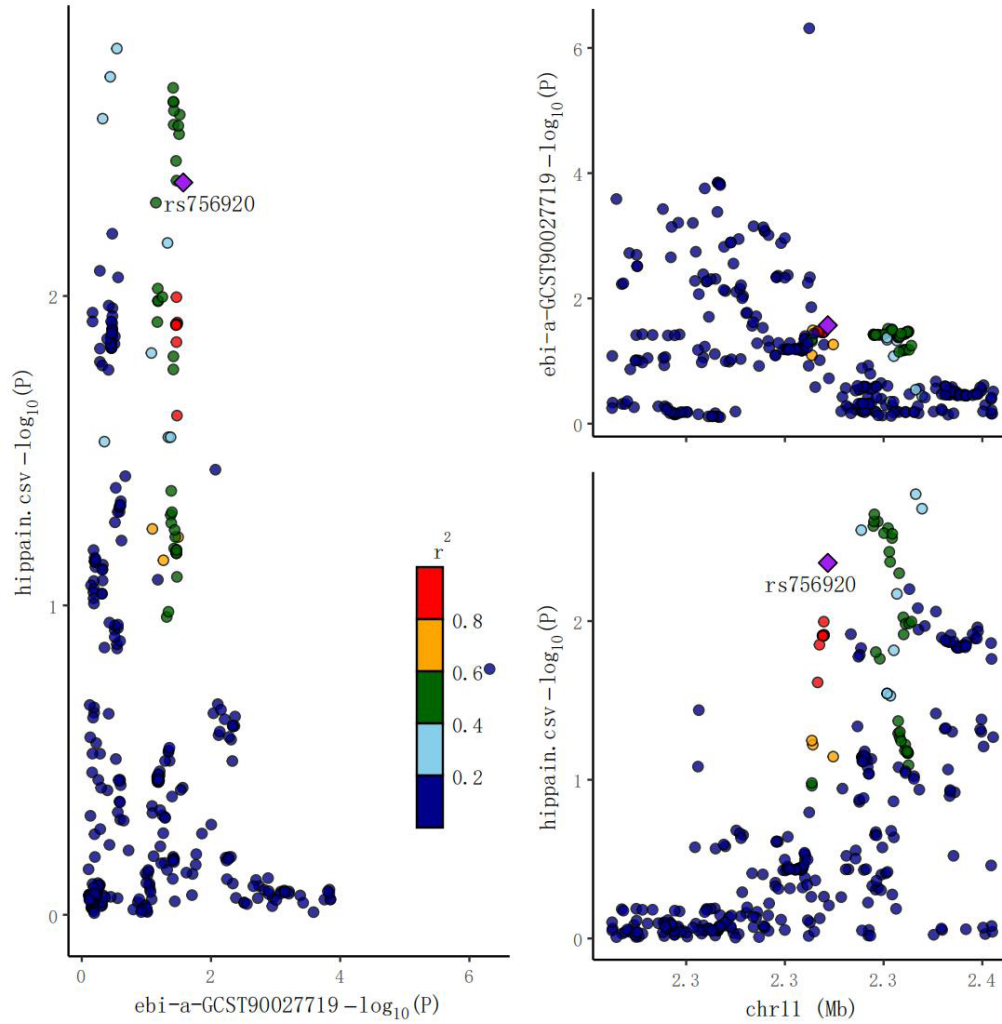

Figure 4j The locuscomparer plot of coloc analysis: Genus Subdoligranulum on Hippain

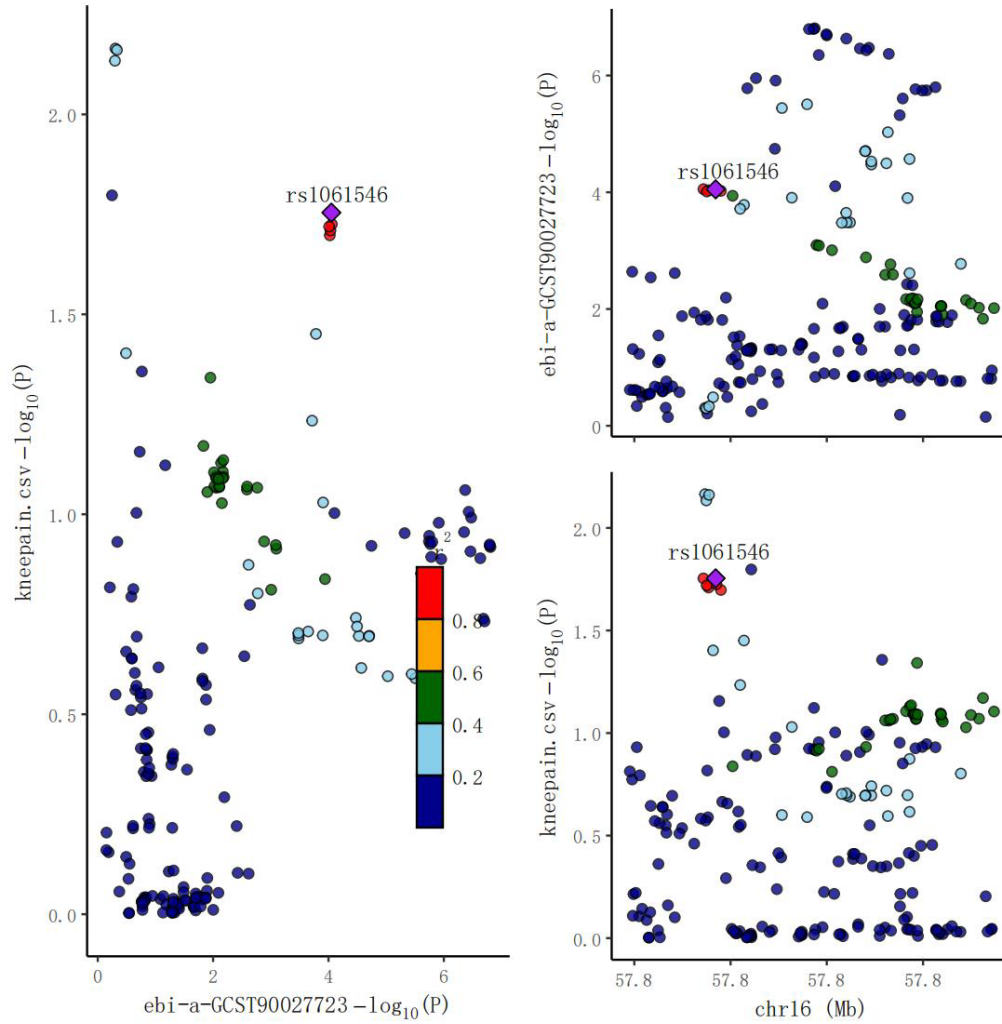

Figure 4k The locuscomparer plot of coloc analysis: Genus Dialister on Kneepain

It is made available under a [CC-BY 4.0 International license](https://creativecommons.org/licenses/by/4.0/).

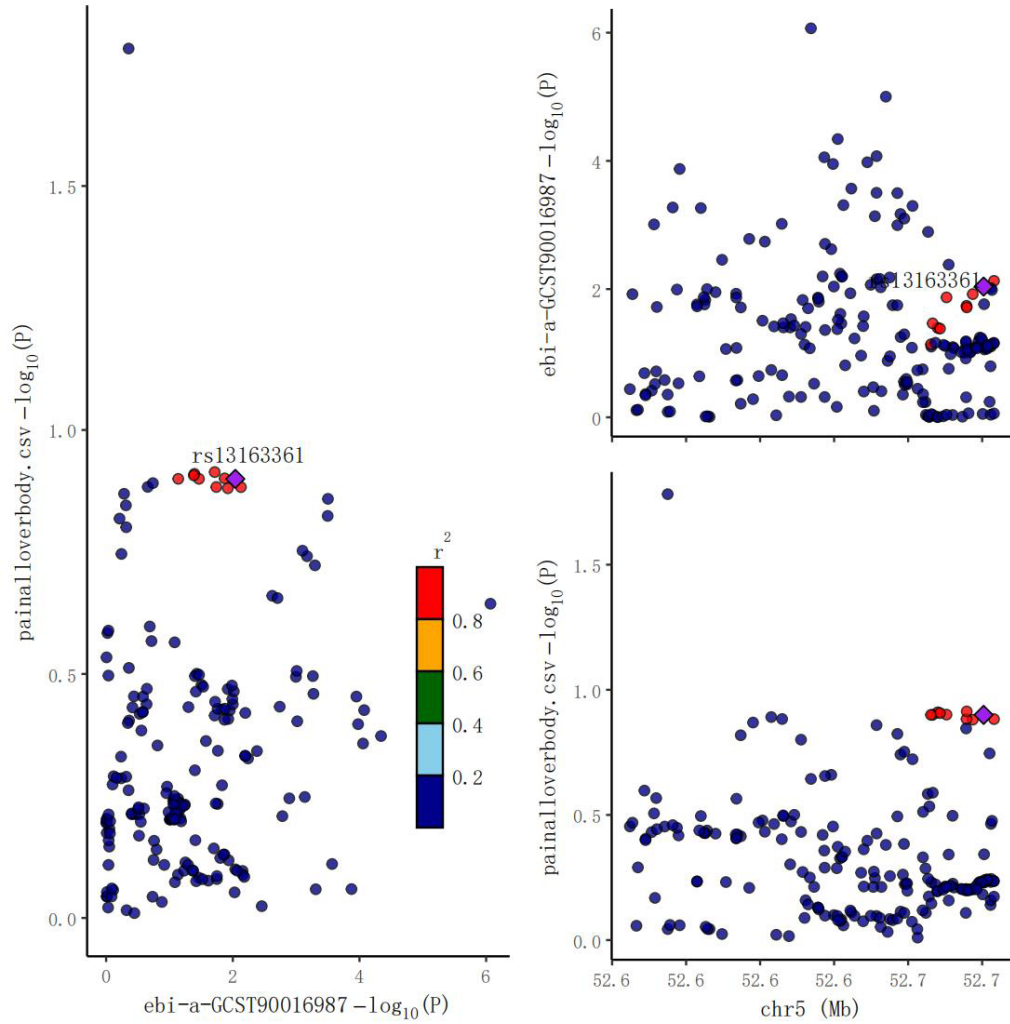

Figure 4| The locuscomparer plot of coloc analysis: Genus *Desulfovibrio* on pain all over body



It is made available under a [CC-BY 4.0 International license](https://creativecommons.org/licenses/by/4.0/).

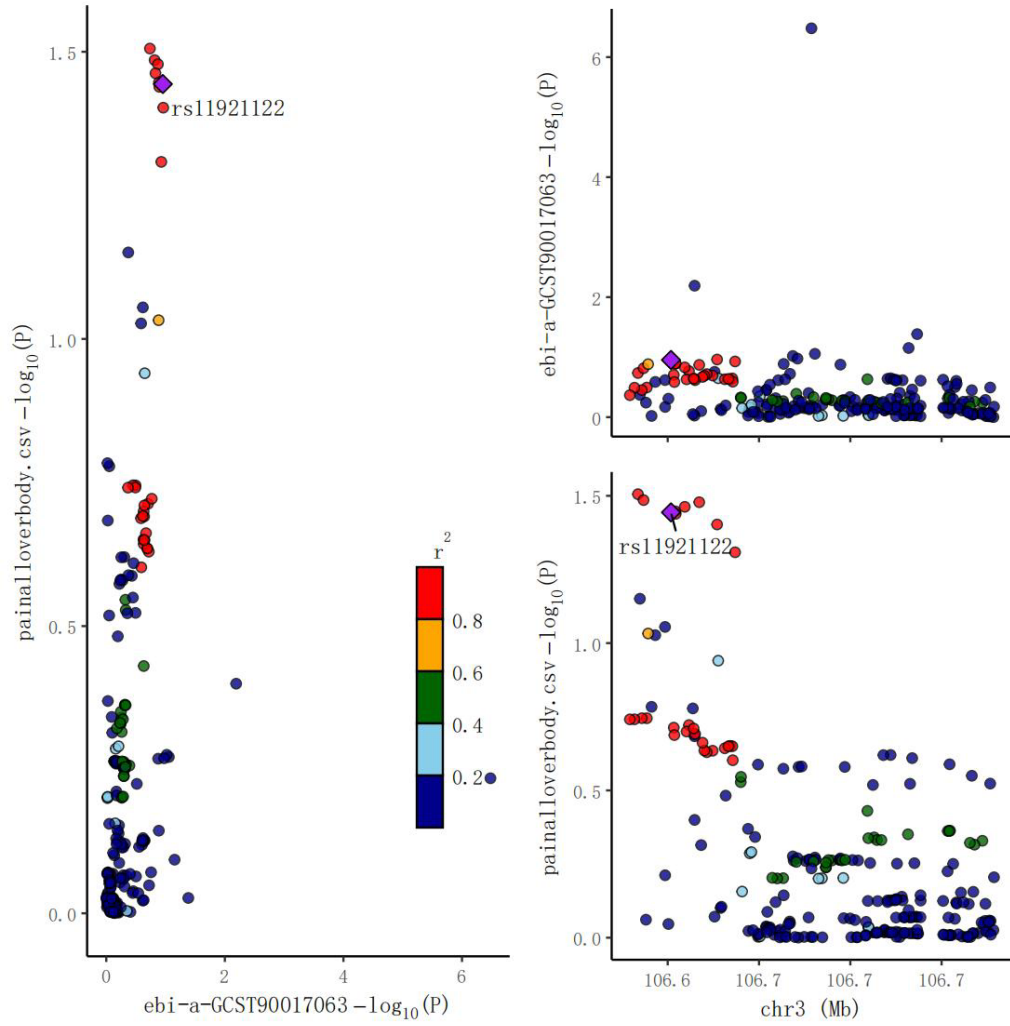

Figure 4m The locuscomparer plot of coloc analysis: Genus Ruminococcus2 on pain all over body

It is made available under a [CC-BY 4.0 International license](https://creativecommons.org/licenses/by/4.0/).

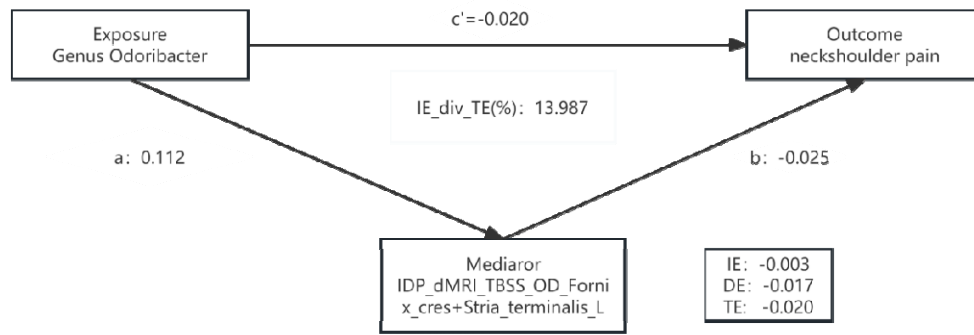

Figure 5 Mediator model: Genus Odoribacter to neck/shoulder pain
